# Supplementary material for: An isolable stannaimine and its cycloaddition/metathesis reactions with carbon dioxide
Source: Royal Society of Chemistry journal article supplement (doi:10.1039/d4cc04006f), 2024-01-01
Supplement: d4cc04006f1.pdf [file d4cc04006f1.pdf]

**ASSOCIATED CONTENT**

**SUPPORTING INFORMATION**

**An Isolable Stannamine and its Cycloaddition/Metathesis Reactions with  
Carbon Dioxide**

Matthew J. Evans, Joseph M. Parr, Dat T. Nguyen, Cameron Jones\*

*School of Chemistry, Monash University, P.O. Box 23, Melbourne, Victoria, 3800, Australia*

**ChemComm**

Chemical Communications

**Contents**

|           |                              |             |
|-----------|------------------------------|-------------|
| <b>1.</b> | <b>Syntheses and Spectra</b> | <b>S2</b>   |
| <b>2.</b> | <b>X-ray Crystallography</b> | <b>S47</b>  |
| <b>3.</b> | <b>Computational</b>         | <b>S62</b>  |
| <b>4.</b> | <b>References</b>            | <b>S106</b> |

## 1. Syntheses and Spectra

### *General Considerations*

All manipulations were carried out using standard Schlenk and glove box techniques under an atmosphere of high purity dinitrogen. Pentane and diethyl ether were distilled over Na/K alloy (50:50), while hexane, toluene and THF were distilled over molten potassium.  $^1\text{H}$ ,  $^{13}\text{C}\{^1\text{H}\}$ ,  $^{29}\text{Si}\{^1\text{H}\}$  and  $^{119}\text{Sn}\{^1\text{H}\}$  NMR spectra were recorded on either Bruker DPX300, Bruker AvanceIII 600 or Bruker AvanceIII 400 spectrometers and were referenced to the resonances of the solvent used,  $\text{SiMe}_4$  or  $\text{SnMe}_4$ . FTIR spectra were collected for solid samples or Nujol mulls on an Agilent Cary 630 attenuated total reflectance (ATR) spectrometer. LC/MS analyses were carried out at the Monash Analytical Platform (School of Chemistry, Monash University). HRMS analyses were conducted by direct injection on an Agilent 6546 LC / QTOF system (Santa Clara, CA, USA) using an APCI source. The instrument was operated in positive mode and data collected in the  $m/z$  range 100–1500. Microanalyses were carried out at by the Elemental Analysis Service at London Metropolitan University. Melting points were determined in sealed glass capillaries under dinitrogen and are uncorrected. 2,4,6-tricyclohexylphenyl bromide,<sup>[S1]</sup>  $\text{NON}^{\text{Ad}}\text{-H}_2$ ,<sup>[S2]</sup> mesityl azide<sup>[S3]</sup> were prepared according to their literature procedures. Unless otherwise stated, chemicals were purchased from Sigma-Aldrich and used as received.

### *Preparation of 2,4,6-tricyclohexylphenyl magnesium bromide, TCHP-MgBr(THF)<sub>2</sub>*

Activated magnesium turnings (0.90 g, 37 mmol) were suspended in dry THF (20 ml) and a concentrated THF solution (50 ml) of 2,4,6-tricyclohexylphenyl bromide (5.00 g, 12.4 mmol) was added. The resultant grey/black mixture was heated at reflux overnight. Complete conversion to the corresponding Grignard reagent was determined by  $^1\text{H}$  NMR spectroscopy. The mixture was filtered through celite and the volatiles removed *in vacuo*. The crude mass was dissolved in a toluene/THF mixture and stored at  $-30\text{ }^\circ\text{C}$  to afford the title compound as colorless crystals. Yield 6.08 g, 86%.

**m.p.:** 267–269  $^\circ\text{C}$  (dec).

**$^1\text{H}$  NMR** (400 MHz,  $\text{C}_6\text{D}_6$ ):  $\delta$  1.21 – 1.30 (m, 8H, THF), 1.31 – 1.56 (m, 4H, Cy-*H*), 1.61 – 2.01 (m, 6H, Cy-*H*), 2.05 – 2.21 (m, 20H, Cy-*H*), 2.55 – 2.70 (m, 1H, Cy-*H*), 2.83 – 2.97 (m, 2H, Cy-*H*), 3.69 – 3.78 (m, 8H, THF), 7.22 (s, 2H, Ar-*H*).

$^{13}\text{C}\{^1\text{H}\}$  NMR (101 MHz,  $\text{C}_6\text{D}_6$ ):  $\delta$  25.2, 26.9, 27.1, 27.7, 27.9, 35.5 (Cy-C), 36.8 (THF), 46.0, 51.8 (Cy-C), 69.4 (THF), 120.5, 145.9, 158.4, 159.7 (Ar-C).

IR  $\text{v}/\text{cm}^{-1}$  (solid): 738 (w), 786 (m), 857 (s), 921 (w), 958 (w), 1014 (s), 1252 (m), 1446 (m), 2848 (s), 2911 (s).

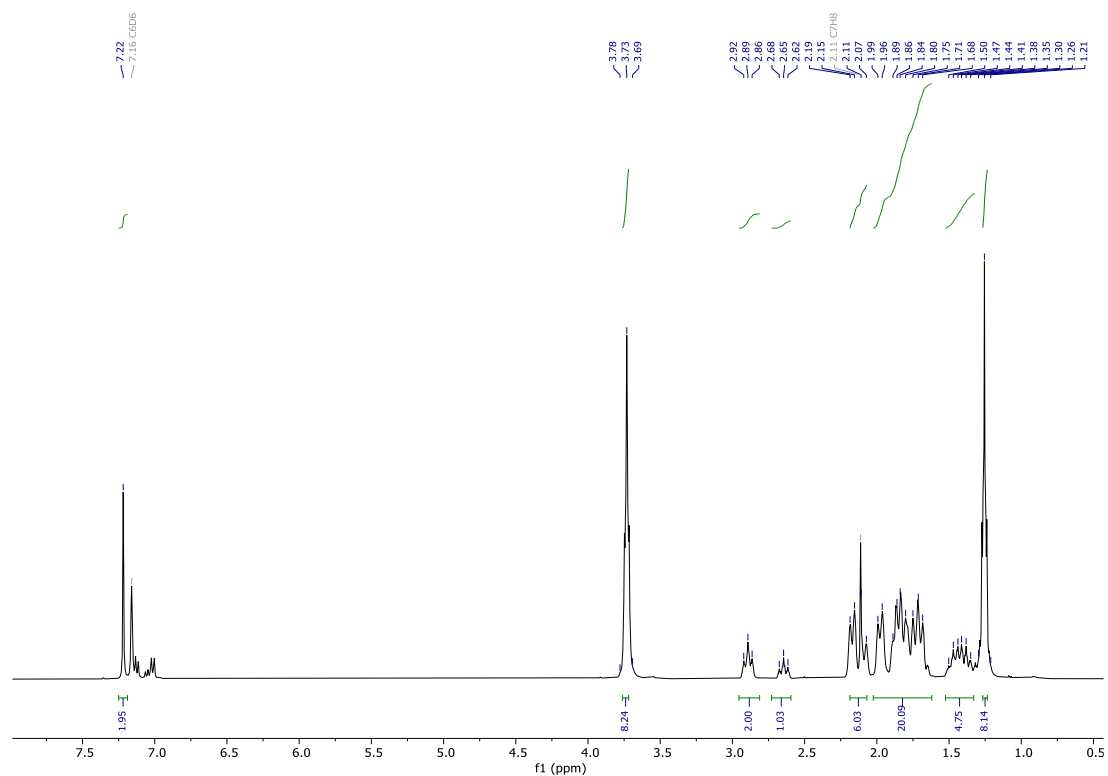

**Figure S1:**  $^1\text{H}$  NMR spectrum (400 MHz, 298 K,  $\text{C}_6\text{D}_6$ ) of TCHP-MgBr(THF) $_2$ .

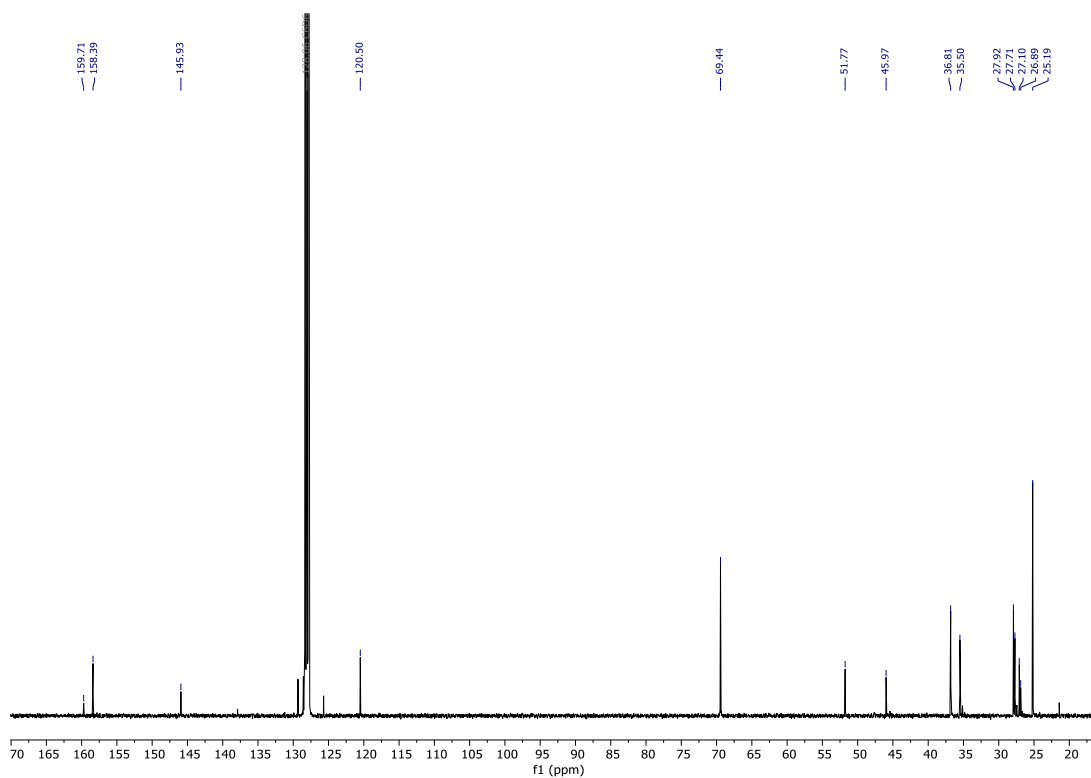

**Figure S2:**  $^{13}\text{C}\{^1\text{H}\}$  NMR spectrum (101 MHz, 298 K,  $\text{C}_6\text{D}_6$ ) of TCHP-MgBr(THF) $_2$ .

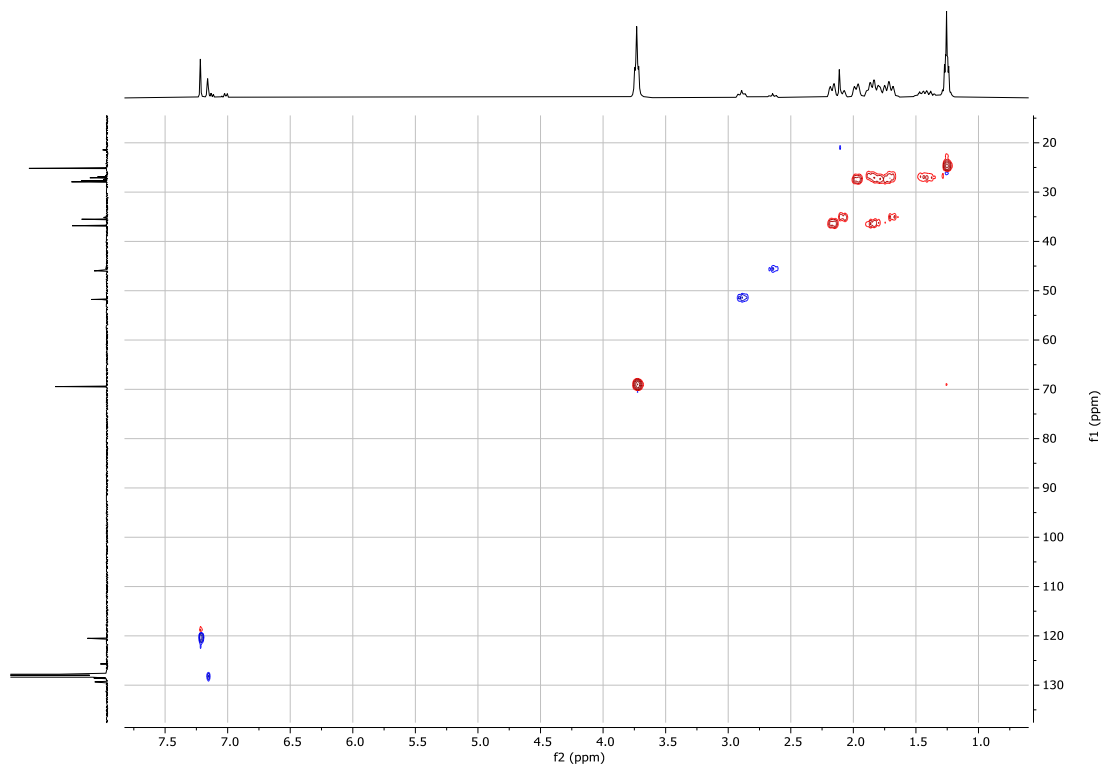

**Figure S3:** HSQC NMR spectrum (298 K,  $\text{C}_6\text{D}_6$ ) of TCHP-MgBr(THF) $_2$ .

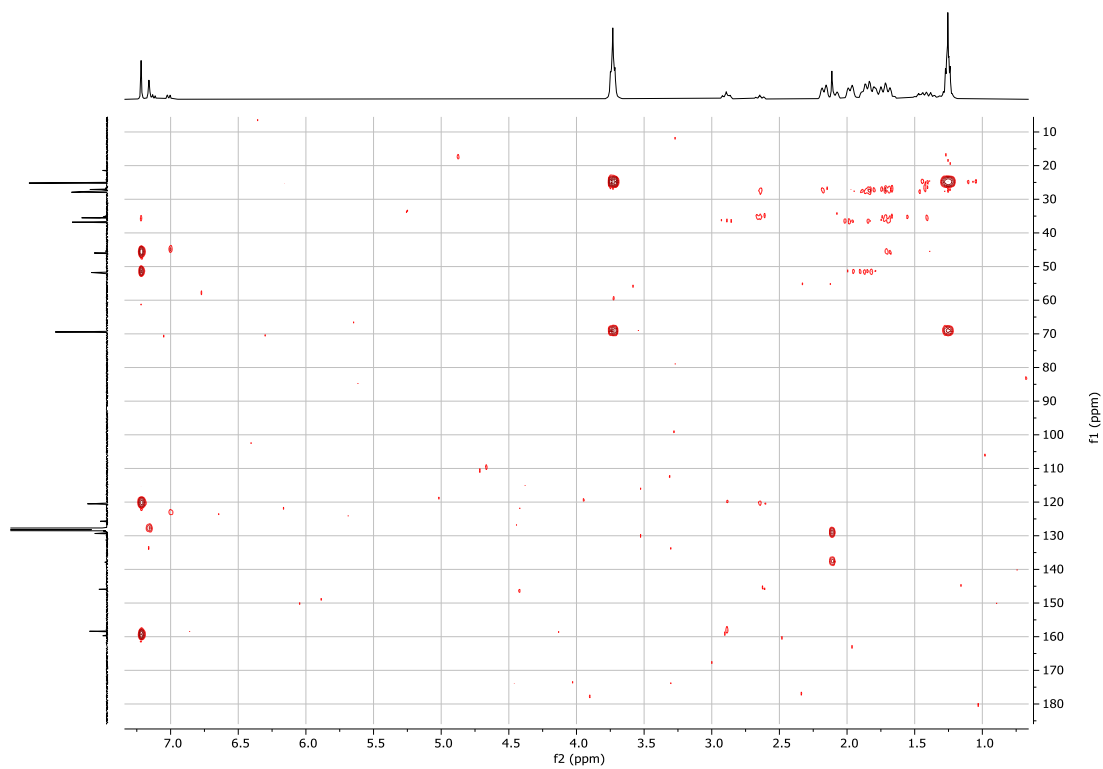

**Figure S4:** HMBC NMR spectrum (298 K,  $C_6D_6$ ) of TCHP-MgBr(THF)<sub>2</sub>.

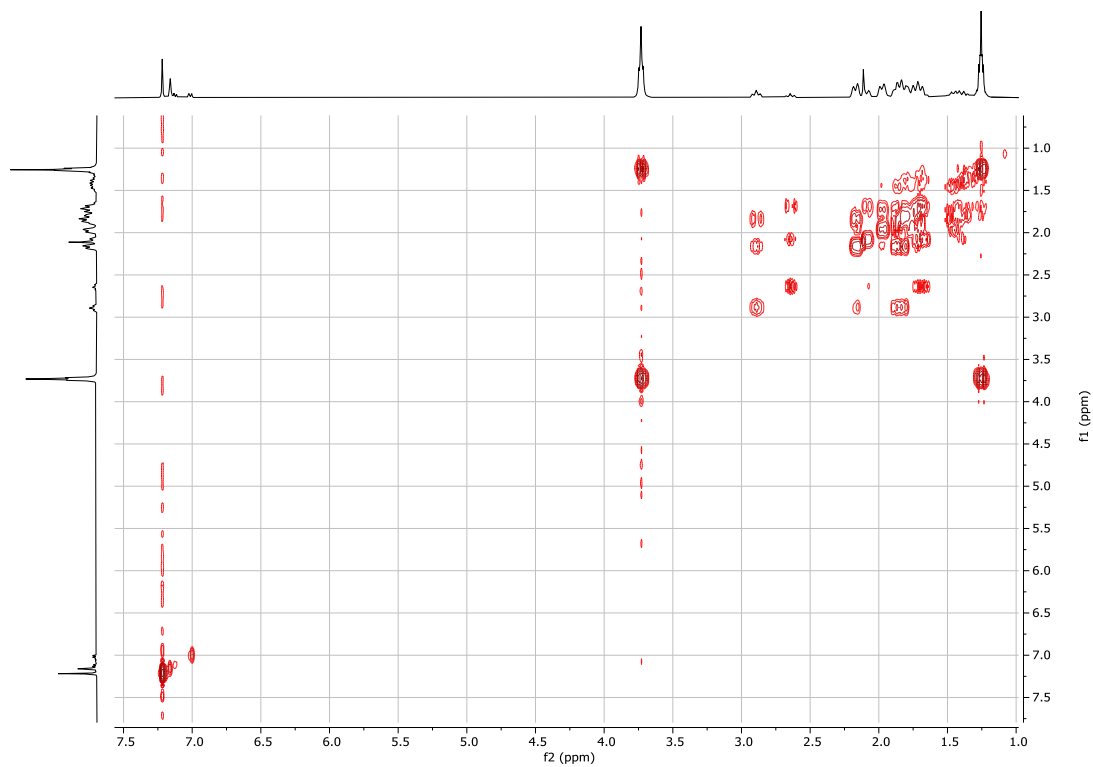

**Figure S5:**  $^1H$ - $^1H$  COSY NMR spectrum (298 K,  $C_6D_6$ ) of TCHP-MgBr(THF)<sub>2</sub>.

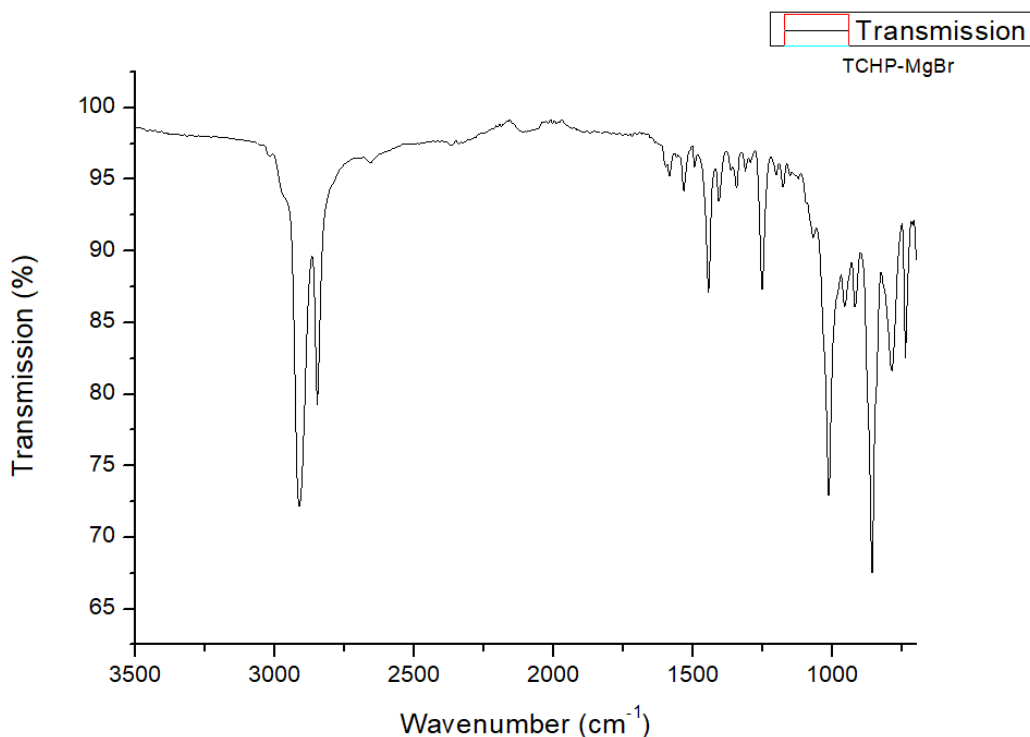

**Figure S6:** FT-IR spectrum of TCHP-MgBr(THF)<sub>2</sub>.

#### ***Preparation of 2,4,6-tricyclohexylphenyl azide (TCHP-N<sub>3</sub>)***

Activated magnesium turnings (4.51 g, 185.6 mmol) were suspended in dry THF (20 ml) and a concentrated THF solution (150 ml) of 2,4,6-tricyclohexyl bromide (25.00 g, 62 mmol) was added. The resultant grey/black mixture was heated at reflux overnight. Complete conversion to the corresponding Grignard reagent was determined by <sup>1</sup>H NMR spectroscopy. The *in situ* prepared Grignard reagent was subsequently filtered onto a solution of tosyl azide (12.26 g, 62.2 mmol) in diethyl ether at 0 °C affording a tan precipitate. After stirring for 2 hours, the mixture was settled, the top solution decanted, and the solid suspended in diethyl ether. A solution of Na<sub>4</sub>P<sub>2</sub>O<sub>7</sub> (16.51 g, 62.1 mmol) in water was then added at 0 °C and the mixture allowed to stir overnight. The organic layer was then extracted and the aqueous phase washed with diethyl ether (2 x 200 ml). The combined organic layers were dried with MgSO<sub>4</sub> and the volatiles removed *in vacuo* to give a red oil/solid. The residue was purified by column chromatography over silica gel (hexane) to give the title compound as a pale yellow-white powder. Crystals suitable for single crystal X-ray diffraction were obtained by slow evaporation from a toluene solution. Yield 20.10 g, 89%.

**m.p.:** 101–103 °C (dec).

**<sup>1</sup>H NMR** (400 MHz, C<sub>6</sub>D<sub>6</sub>): δ 1.07 – 1.52 (m, 16H, Cy-*H*), 1.59 – 1.98 (m, 14H, Cy-*H*), 2.38 – 2.51 (m, 1H, Cy-*H*), 3.04 – 3.18 (m, 2H, Cy-*H*), 7.05 (s, 2H, Ar-*H*).

**<sup>13</sup>C{<sup>1</sup>H} NMR** (101 MHz, C<sub>6</sub>D<sub>6</sub>): δ 26.5, 26.6, 27.3, 27.3, 34.5, 35.0, 40.1, 45.1 (Cy-*C*), 123.4, 133.9, 142.3, 146.6 (Ar-*C*).

**IR v/cm<sup>-1</sup> (solid):** 786 (w), 809 (w), 846 (w), 861 (s), 950 (w), 999 (m), 1029 (w), 1073 (w), 1096 (m), 1271 (m), 1308 (s), 1349 (w), 1442 (s), 1599 (w), 2098 (s), 2128 (s), 2848 (s), 2922 (s).

HRMS was not obtained due to the explosive nature of azides towards thermal decomposition.

Melting point obtained in a sealed capillary behind a blast shield.

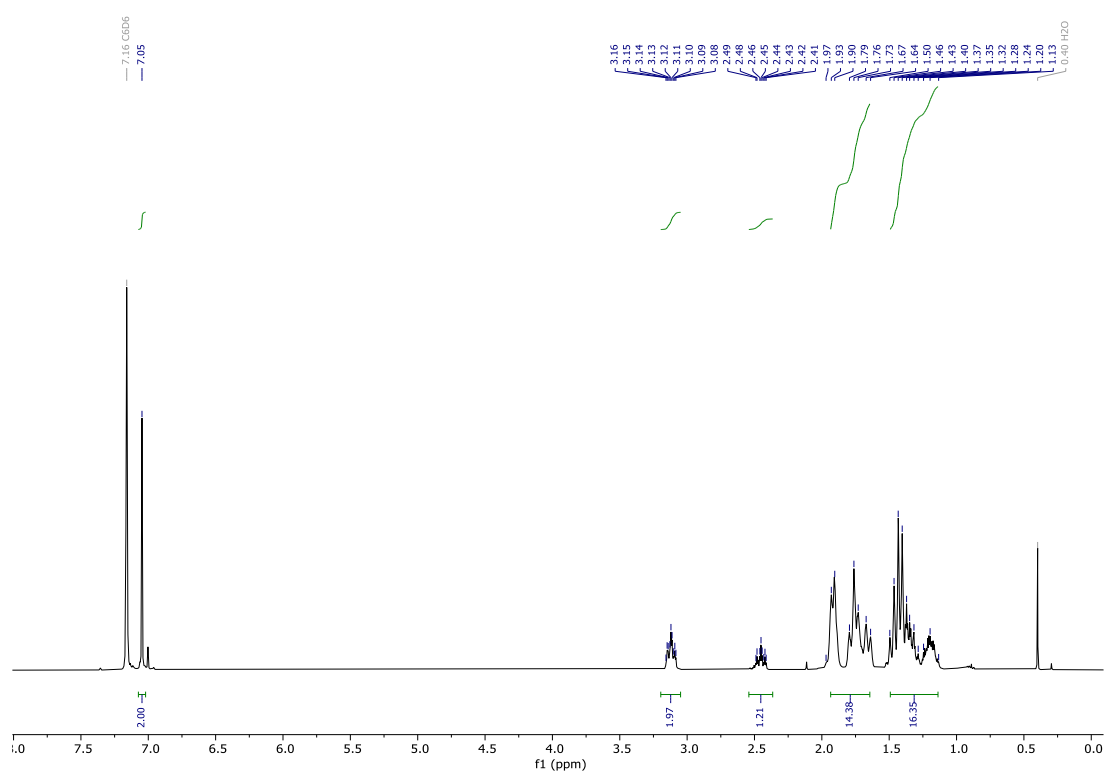

**Figure S7:** <sup>1</sup>H NMR spectrum (400 MHz, 298 K, C<sub>6</sub>D<sub>6</sub>) of 2,4,6-tricyclohexylphenyl azide.

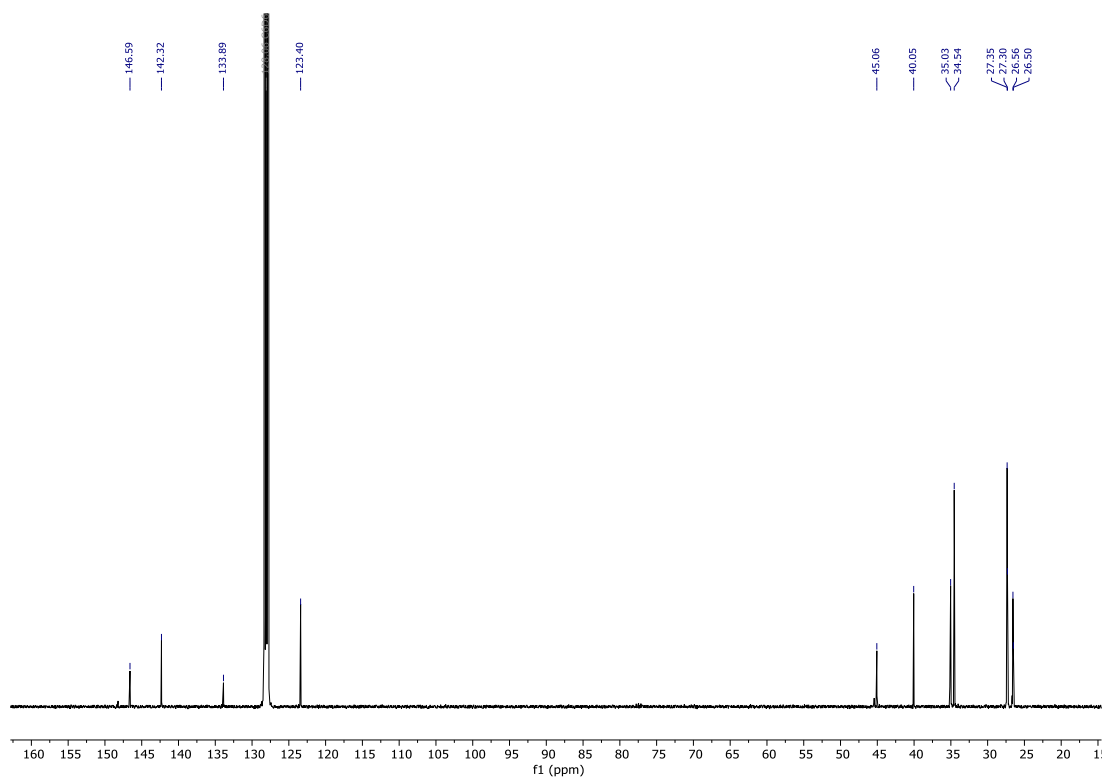

**Figure S8:**  $^{13}\text{C}\{^1\text{H}\}$  NMR spectrum (101 MHz, 298 K,  $\text{C}_6\text{D}_6$ ) of 2,4,6-tricyclohexylphenyl azide.

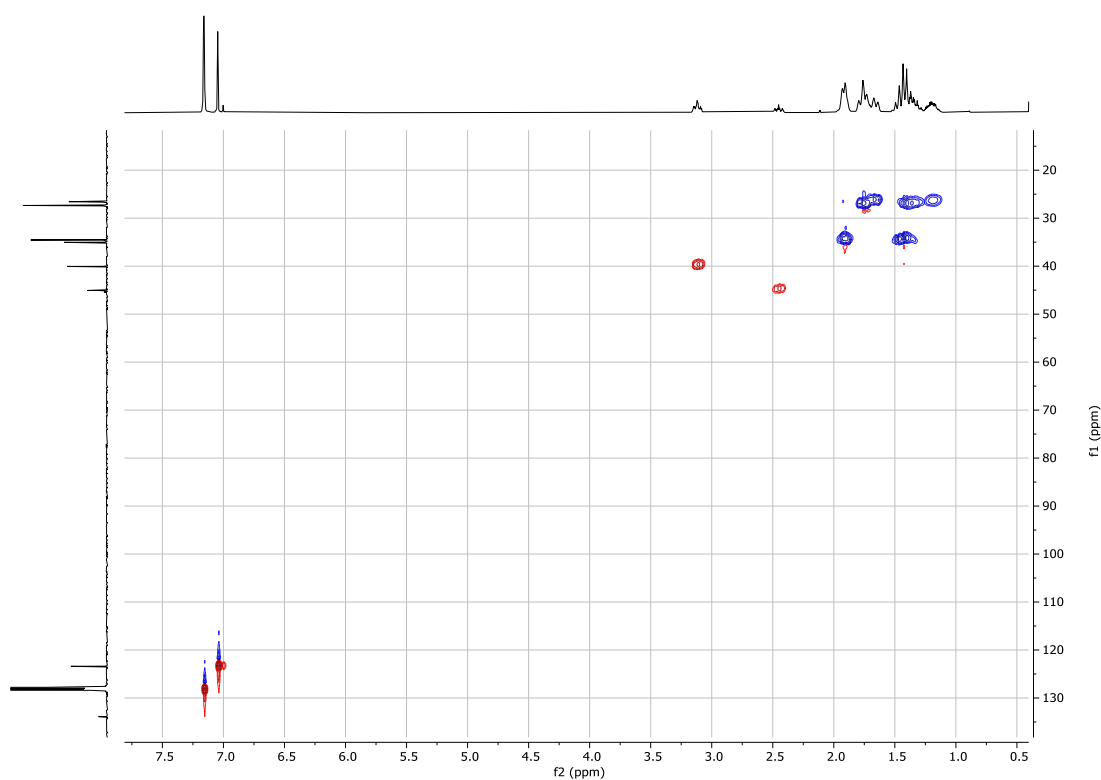

**Figure S9:** HSQC NMR spectrum (298 K,  $\text{C}_6\text{D}_6$ ) of 2,4,6-tricyclohexylphenyl azide.



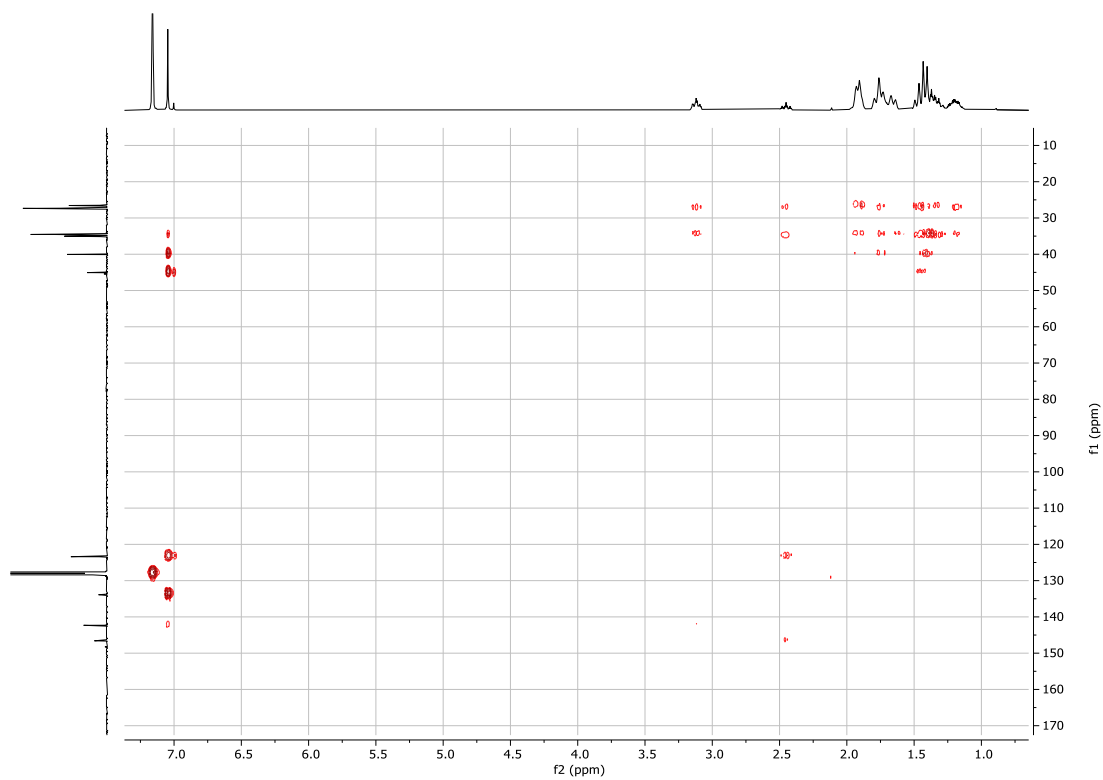

**Figure S10:** HMBC NMR spectrum (298 K, C<sub>6</sub>D<sub>6</sub>) of 2,4,6-tricyclohexylphenyl azide.

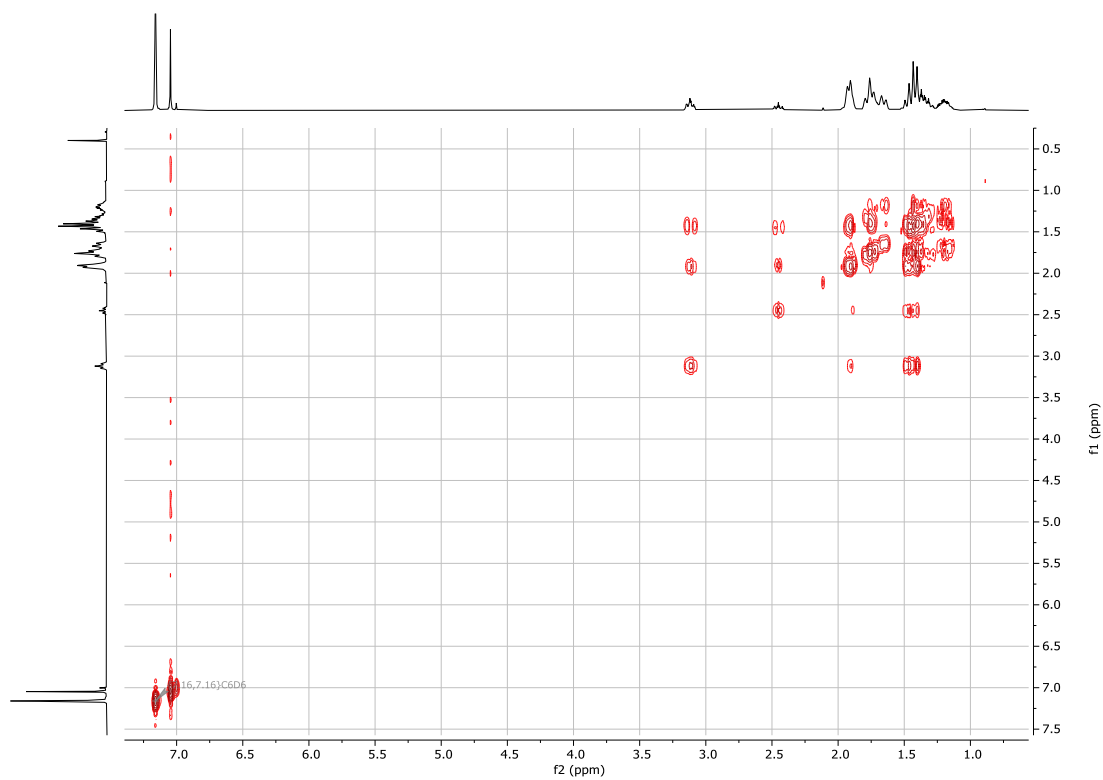

**Figure S11:** <sup>1</sup>H-<sup>1</sup>H COSY NMR spectrum (298 K, C<sub>6</sub>D<sub>6</sub>) of 2,4,6-tricyclohexylphenyl azide.

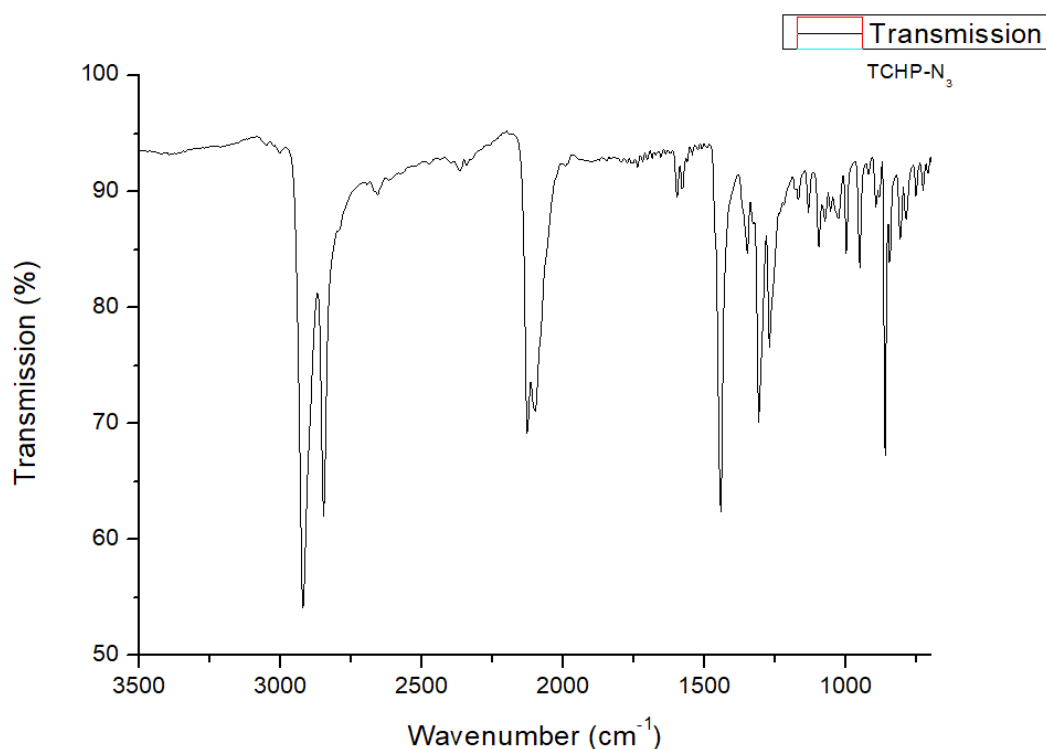

**Figure S12:** FT-IR spectrum of 2,4,6-tricyclohexylphenyl azide.

**Preparation of  $:\text{Sn}(\text{NON}^{\text{Ad}})$  (**1**)**

A flame-dried Schlenk was charged with  $\text{NON}^{\text{Ad}}\text{-H}_2$  (5.00 g, 11.6 mmol) and dissolved in diethyl ether (*ca.* 30 mL). A solution of  $n\text{BuLi}$  (1.6 M in hexanes, 23.2 mmol, 14.5 mL) was added dropwise to the reaction mixture and allowed to stir for 1 hour at room temperature. Solid  $\text{SnCl}_2$  (2.19 g, 11.6 mmol) was added directly to the reaction mixture using a solid-addition Schlenk and stirred for an additional 18 hours. The volatiles were removed *in vacuo* and the product extracted in hexane (*ca.* 3 x 10 mL). Concentration of the mother liquor and storage at  $-30\text{ }^\circ\text{C}$  afforded green-yellow dichroic crystals. The supernatant was decanted and the crystals were dried *in vacuo*. Yield 3.40 g, 54%. NOTE: Crystallisation at  $-30\text{ }^\circ\text{C}$  provides the distannene  $[\text{Sn}(\text{NON}^{\text{Ad}})]_2$  (**[1]<sub>2</sub>**). Crystallisation from boiling hexane gives the stannylene  $:\text{Sn}(\text{NON}^{\text{Ad}})$  (**1**). Crystallisation from minimum hexane at room temperature ( $25\text{ }^\circ\text{C}$ ) gives a mixture of the distannene (**[1]<sub>2</sub>**)/stannylene (**1**).

**m.p.:** 161–163  $^\circ\text{C}$  (dec).

**$^1\text{H}$  NMR** (400 MHz,  $\text{C}_6\text{D}_6$ ):  $\delta$  0.45 (s, 12H,  $\text{SiMe}_2$ ), 1.53 – 1.64 (m, 12H, Ad-*H*), 1.96 – 2.05 (m, 6H, Ad-*H*), 2.05 – 2.10 (m, 12H, Ad-*H*).

$^{13}\text{C}\{^1\text{H}\}$  NMR (101 MHz,  $\text{C}_6\text{D}_6$ ):  $\delta$  7.6 ( $\text{SiMe}_2$ ), 31.2, 36.7, 51.6 ( $\text{Ad-C}$ ).

$^{29}\text{Si}\{^1\text{H}\}$  NMR (80 MHz,  $\text{C}_6\text{D}_6$ ):  $\delta$  -11.8 ( $\text{SiMe}_2$ ).

$^{119}\text{Sn}\{^1\text{H}\}$  NMR (149 MHz,  $\text{C}_6\text{D}_6$ ):  $\delta$  832.3 ( $\text{Sn}$ ).

**IR**  $\nu/\text{cm}^{-1}$  (solid): 712 (m), 779 (s), 816 (w), 839 (s), 939 (w), 962 (w), 1003 (m), 1025 (w), 1070 (w), 1092 (w), 1114 (w), 1152 (m), 1249 (s), 1301 (w), 1342 (w), 1353 (m), 1401 (m), 1450 (m), 2844 (s), 2900 (s).

**E.A.:** Anal. Calcd. for  $\text{C}_{24}\text{H}_{42}\text{N}_2\text{OSi}_2\text{Sn}$  (549.49): C, 52.46; H, 7.70; N, 5.10 %. Found: C, 52.25; H, 7.87; N, 4.62 %.

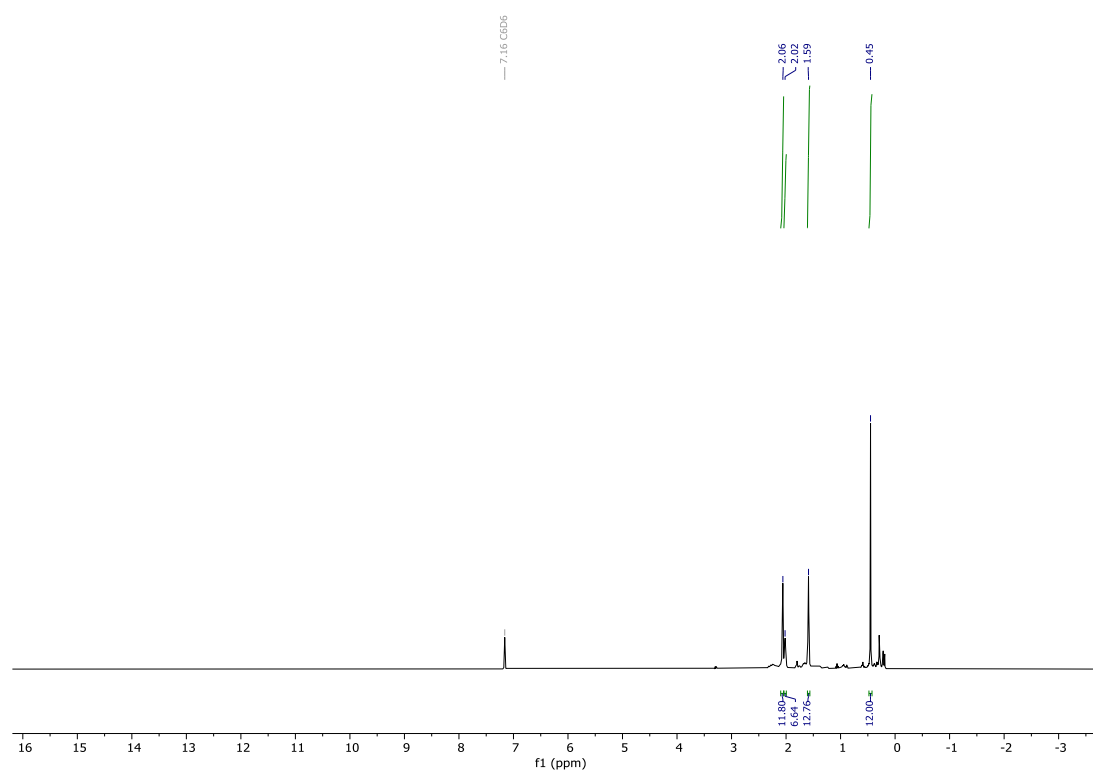

**Figure S13:**  $^1\text{H}$  NMR spectrum (400 MHz, 298 K,  $\text{C}_6\text{D}_6$ ) of **1**.

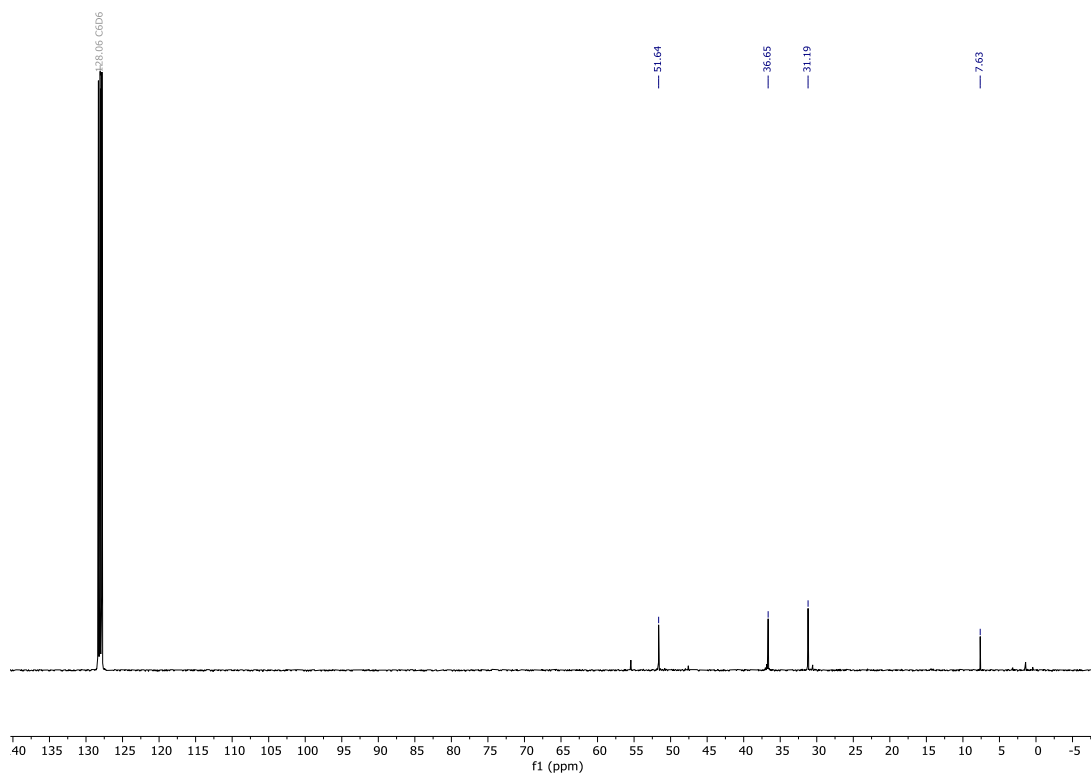

**Figure S14:**  $^{13}\text{C}\{^1\text{H}\}$  NMR spectrum (101 MHz, 298 K,  $\text{C}_6\text{D}_6$ ) of **1**.

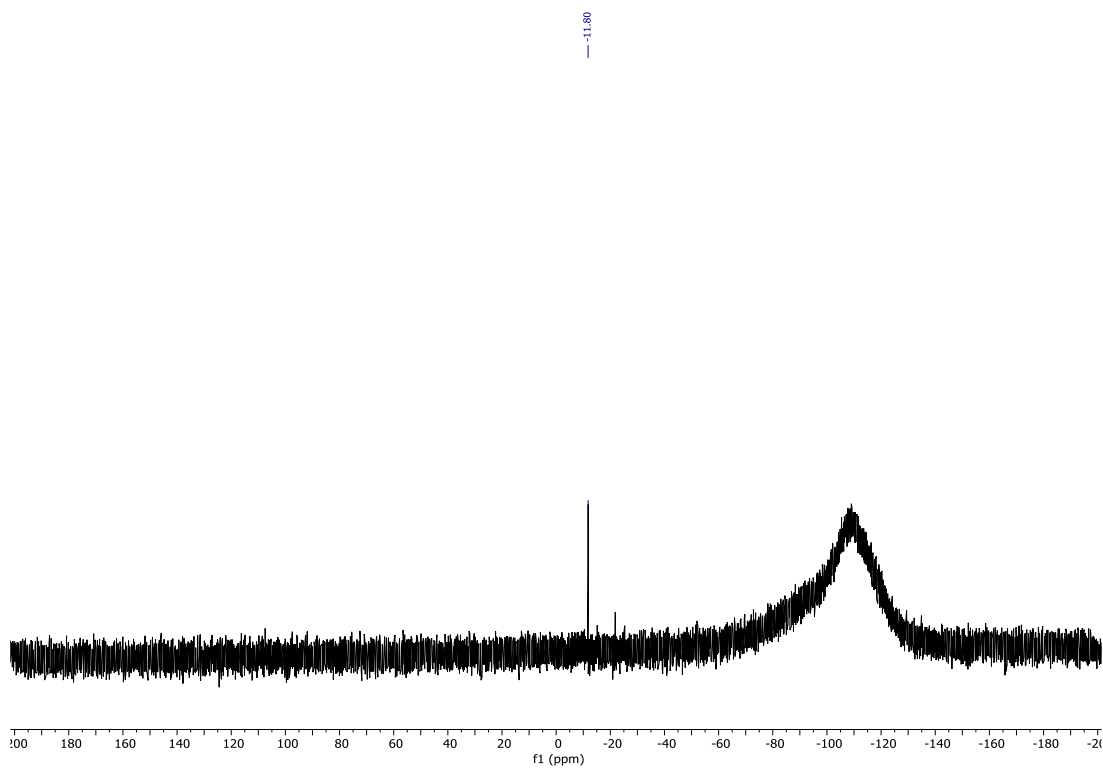

**Figure S15:**  $^{29}\text{Si}\{^1\text{H}\}$  NMR spectrum (80 MHz, 298 K,  $\text{C}_6\text{D}_6$ ) of **1**.

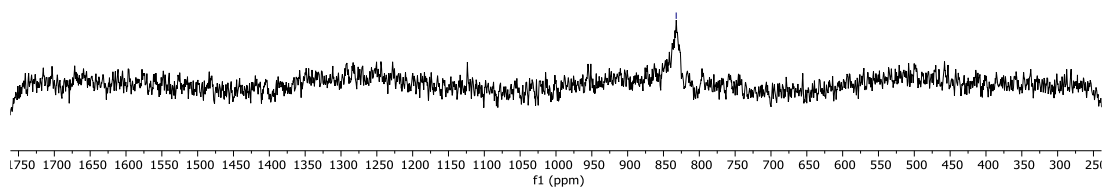

**Figure S16:**  $^{119}\text{Sn}\{^1\text{H}\}$  NMR spectrum (149 MHz, 298 K,  $\text{C}_6\text{D}_6$ ) of **1**.

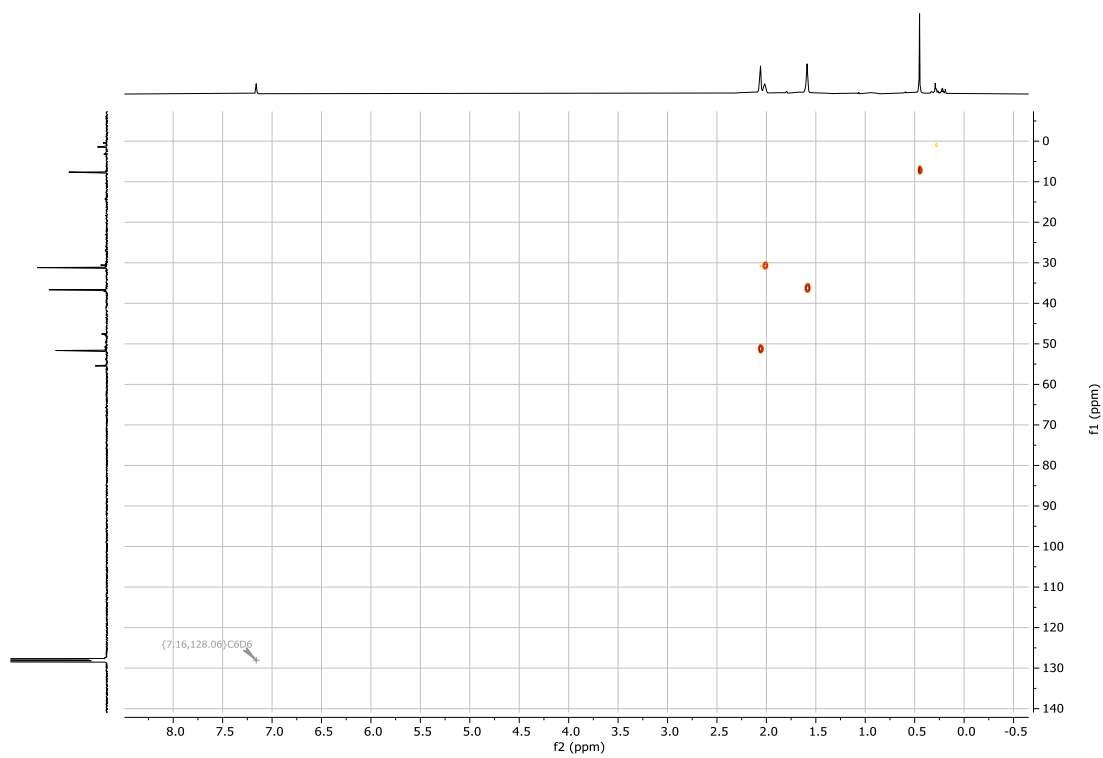

**Figure S17:** HSQC NMR spectrum (298 K,  $\text{C}_6\text{D}_6$ ) of **1**.



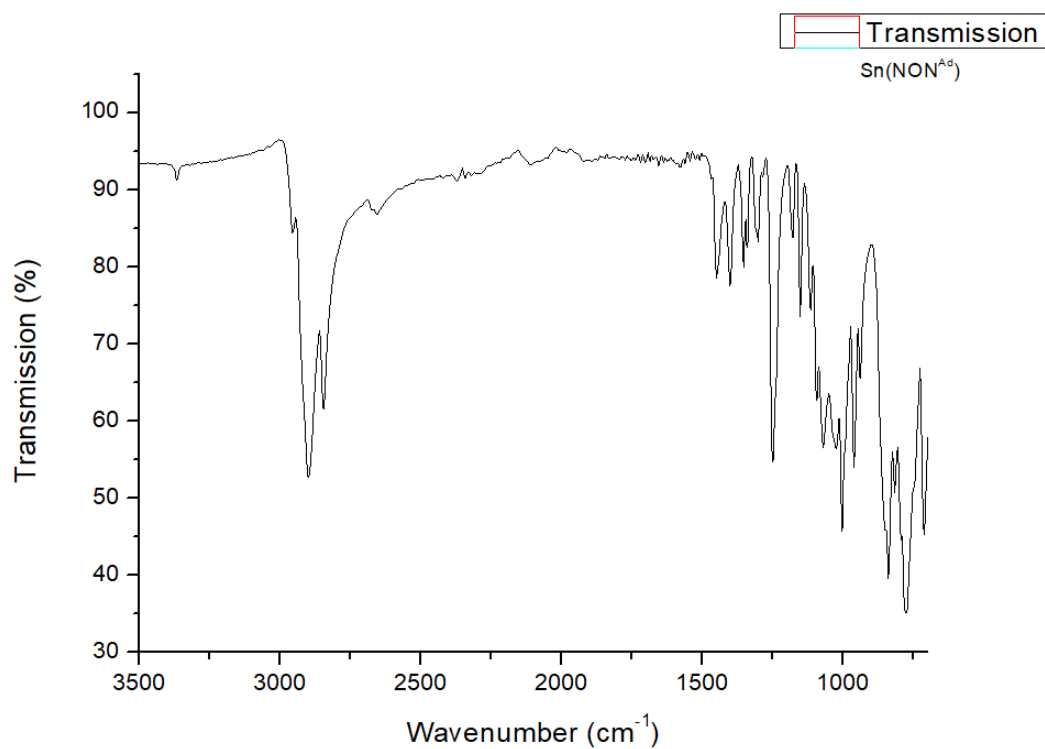

**Figure S20:** FT-IR spectrum of **1**.

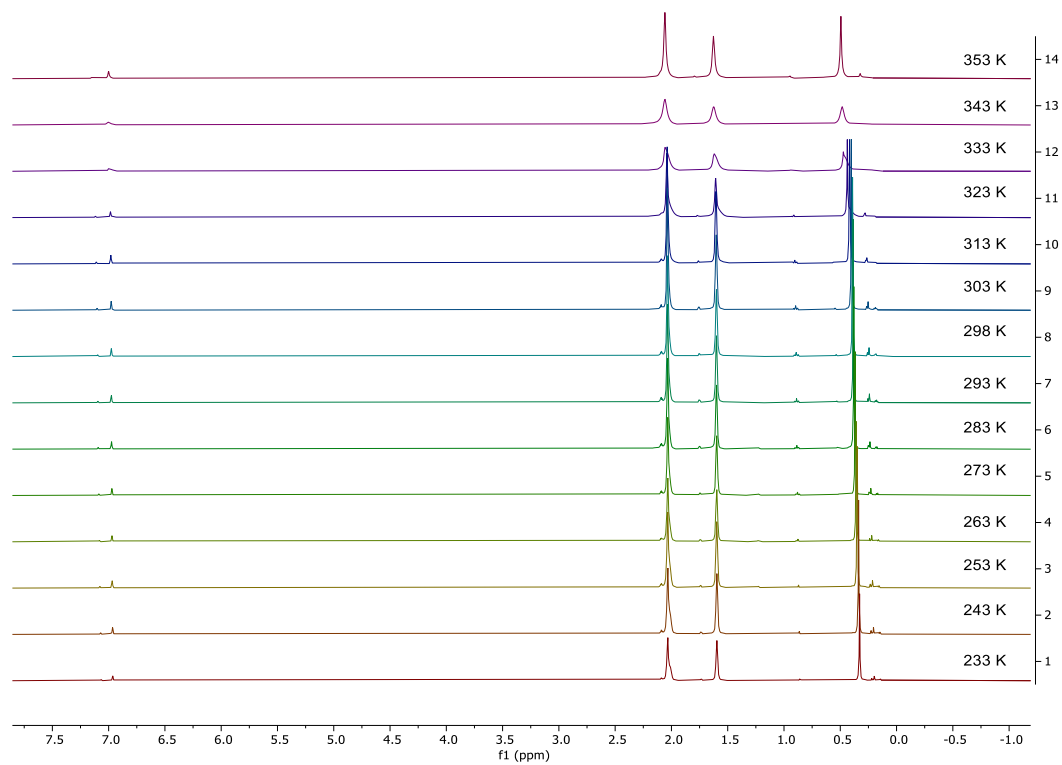

**Figure S21:** VT-<sup>1</sup>H NMR spectrum (400 MHz, C<sub>7</sub>D<sub>8</sub>) of **1**.

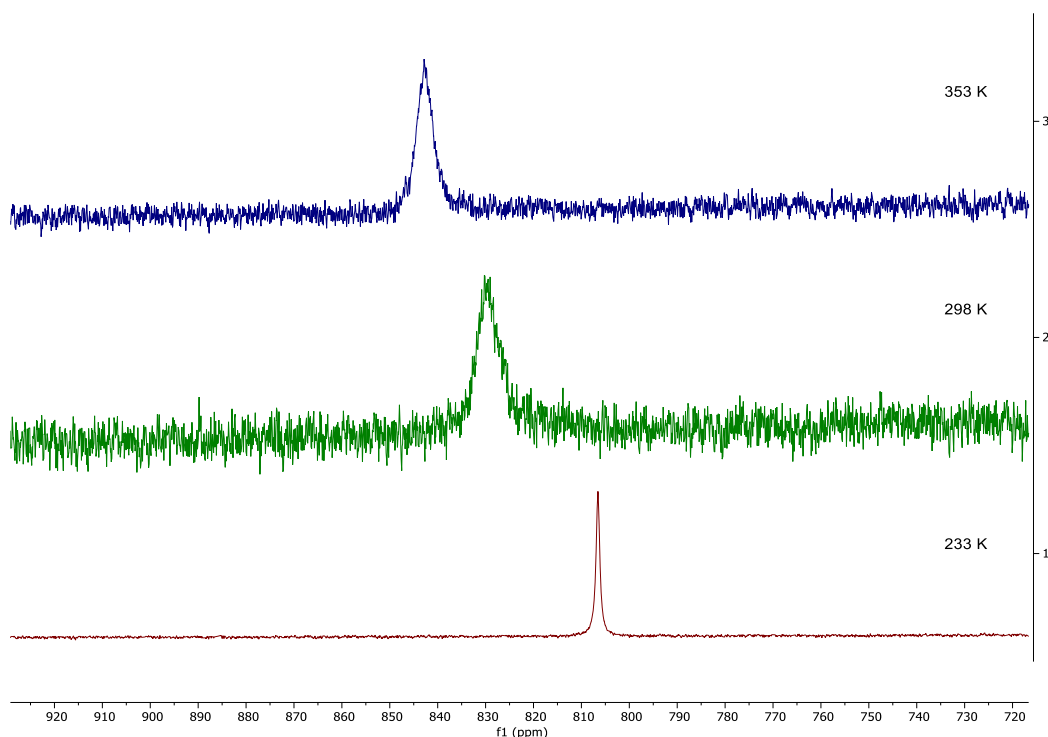

**Figure S22:** VT- $^{119}\text{Sn}\{^1\text{H}\}$  NMR spectrum (149 MHz,  $\text{C}_7\text{D}_8$ ) of **1**.

**Preparation of  $\text{Sn}(\text{NON}^{\text{Ad}})(\text{Mes}_2\text{N}_4)$  (**2**)**

**1** (100 mg, 0.18 mmol) was charged to a flame-dried Schlenk flask and hexane (~5 mL) was added. The mixture was cooled to  $-78\text{ }^\circ\text{C}$  and mesityl azide (58 mg, 0.36 mmol) was added dropwise. The solution was allowed to warm to room temperature and stirred for 2 hours to give a pale orange-yellow solution. Crystals were obtained from a saturated hexane solution stored at  $-30\text{ }^\circ\text{C}$  and washed with cold hexane. Yield 75 mg, 49%.

**m.p.:** 142–144  $^\circ\text{C}$  (dec).

$^1\text{H}$  NMR (400 MHz,  $\text{C}_6\text{D}_6$ ):  $\delta$  0.30 (s, 12H,  $\text{SiMe}_2$ ), 1.28 – 1.34 (m, 12H, Ad-*H*), 1.72 – 1.78 (m, 6H, Ad-*H*), 1.80 – 1.85 (m, 12H, Ad-*H*), 2.17 (s, 6H, *p*- $\text{CH}_3$ ), 2.81 (s, 12H, *o*- $\text{CH}_3$ ), 6.90 (s, 4H,  $\text{MesAr-H}$ ).

$^{13}\text{C}\{^1\text{H}\}$  NMR (101 MHz,  $\text{C}_6\text{D}_6$ ):  $\delta$  6.6 ( $\text{SiMe}_2$ ), 20.6 (*p*- $\text{CH}_3$ ), 23.8 (*o*- $\text{CH}_3$ ), 30.8, 35.8, 46.9, 56.2 (Ad-*C*), 130.2, 131.3, 132.0, 143.1 ( $\text{MesAr-C}$ ).

$^{29}\text{Si}\{^1\text{H}\}$  NMR (80 MHz,  $\text{C}_6\text{D}_6$ ):  $\delta$  -3.7 ( $\text{SiMe}_2$ ).

$^{119}\text{Sn}\{^1\text{H}\}$  NMR (149 MHz,  $\text{C}_6\text{D}_6$ ):  $\delta$  -253 (*Sn*).



**IR  $\nu/\text{cm}^{-1}$  (solid):** 723 (w), 783 (s), 850 (s), 921 (m), 962 (m), 995 (s), 1040 (m), 1066 (s), 1085 (w), 1252 (s), 1301 (w), 1401 (w), 1424 (w), 1450 (w), 1476 (m), 2117 (w), 2848 (s), 2904 (s).

**E.A.:** Anal. Calcd. for  $\text{C}_{42}\text{H}_{64}\text{N}_6\text{OSi}_2\text{Sn}$  (843.89): C, 59.78; H, 7.64; N, 9.96 %. Found: C, 58.45; H, 7.73; N, 8.92 %.

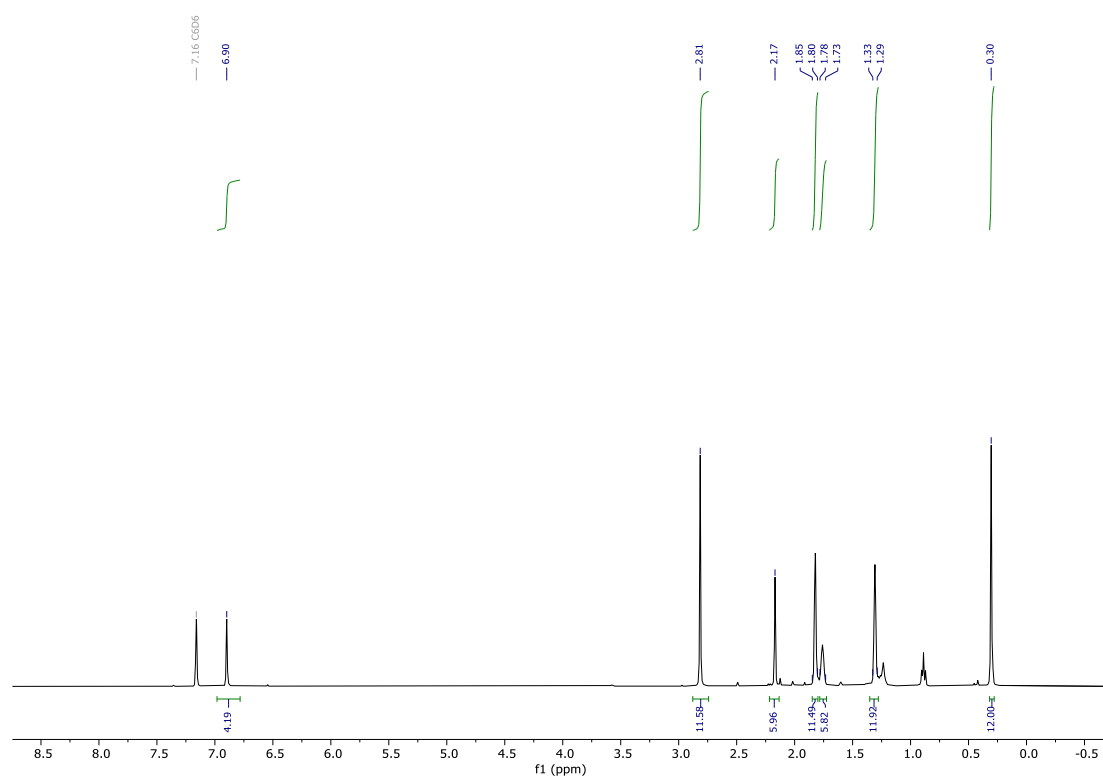

**Figure S23:**  $^1\text{H}$  NMR spectrum (400 MHz, 298 K,  $\text{C}_6\text{D}_6$ ) of **2**.

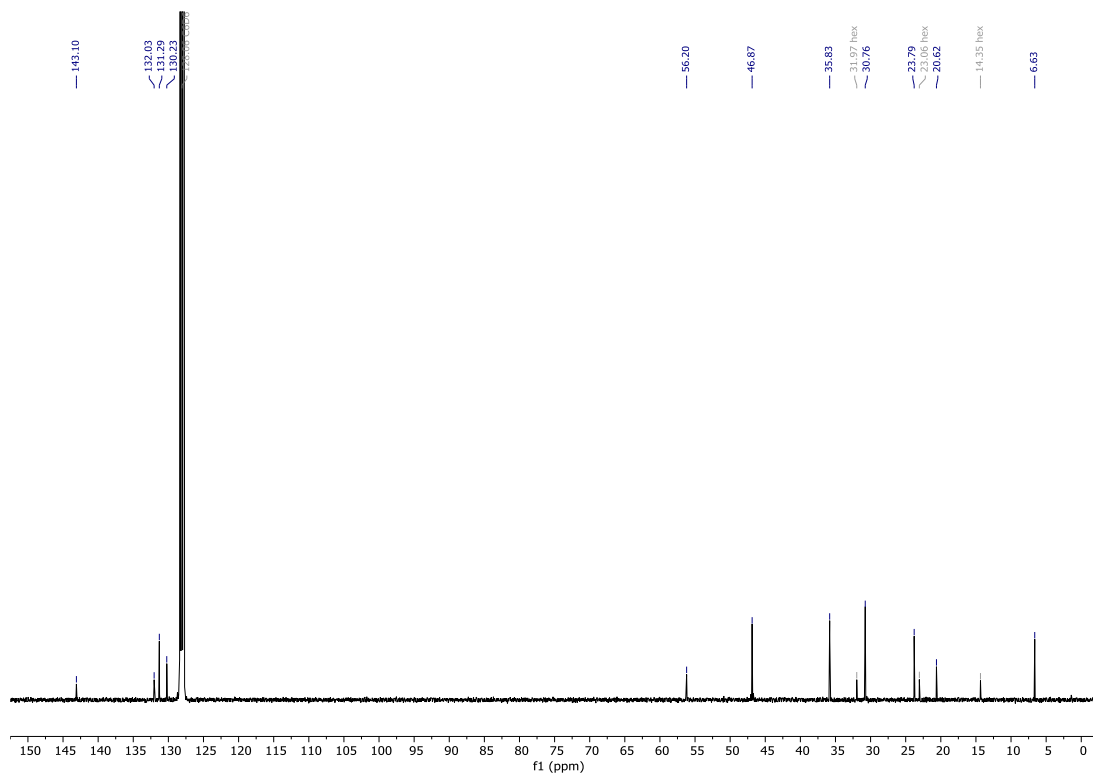

**Figure S24:**  $^{13}\text{C}\{^1\text{H}\}$  NMR spectrum (101 MHz, 298 K,  $\text{C}_6\text{D}_6$ ) of **2**.

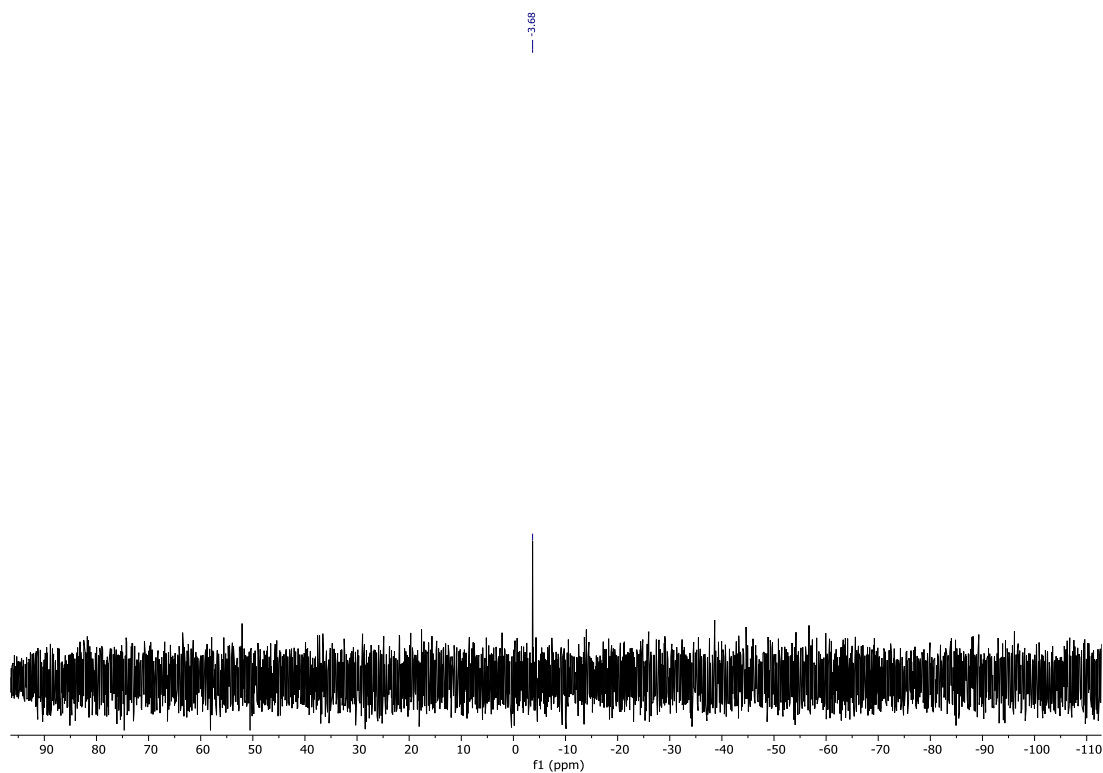

**Figure S25:**  $^{29}\text{Si}\{^1\text{H}\}$  NMR spectrum (80 MHz, 298 K,  $\text{C}_6\text{D}_6$ ) of **2**.

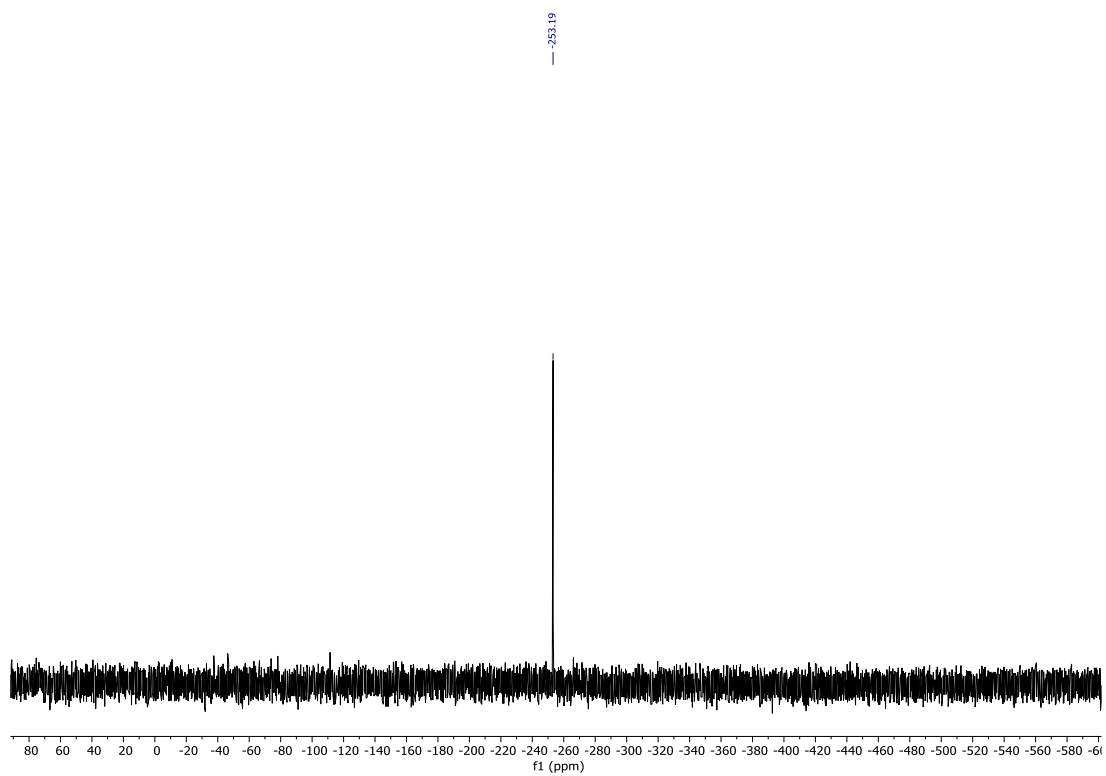

**Figure S26:**  $^{119}\text{Sn}\{^1\text{H}\}$  NMR spectrum (149 MHz, 298 K,  $\text{C}_6\text{D}_6$ ) of **2**.

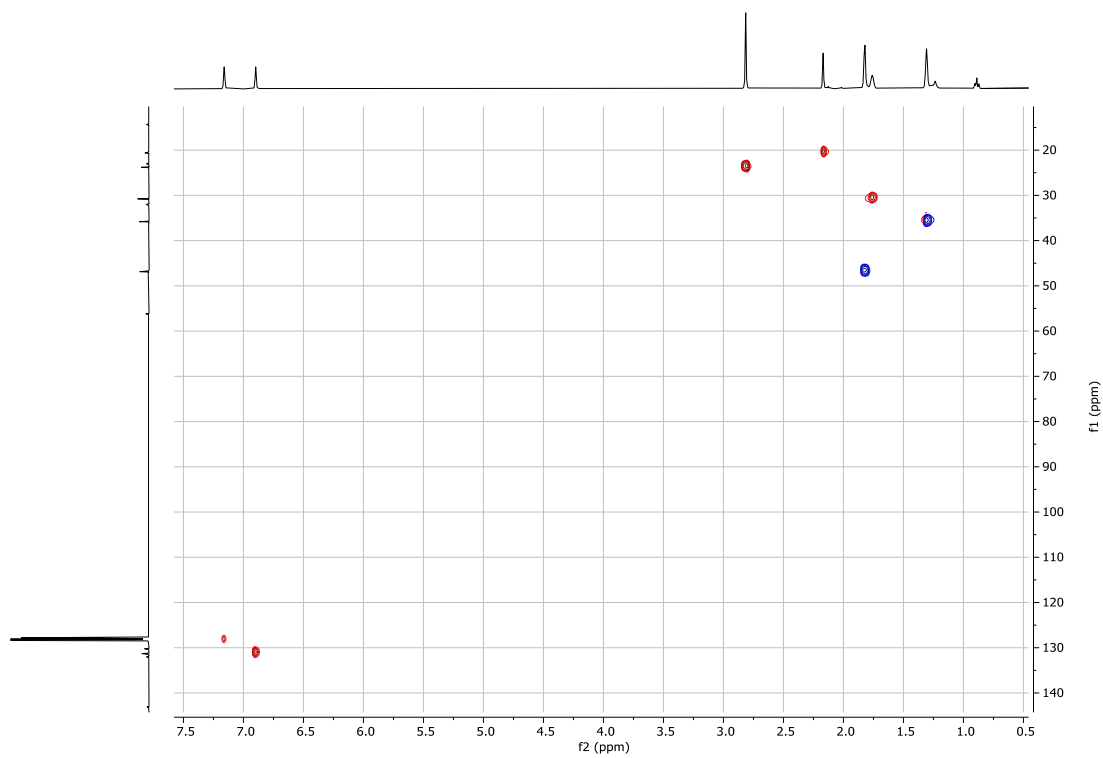

**Figure S27:** HSQC NMR spectrum (298 K,  $\text{C}_6\text{D}_6$ ) of **2**.

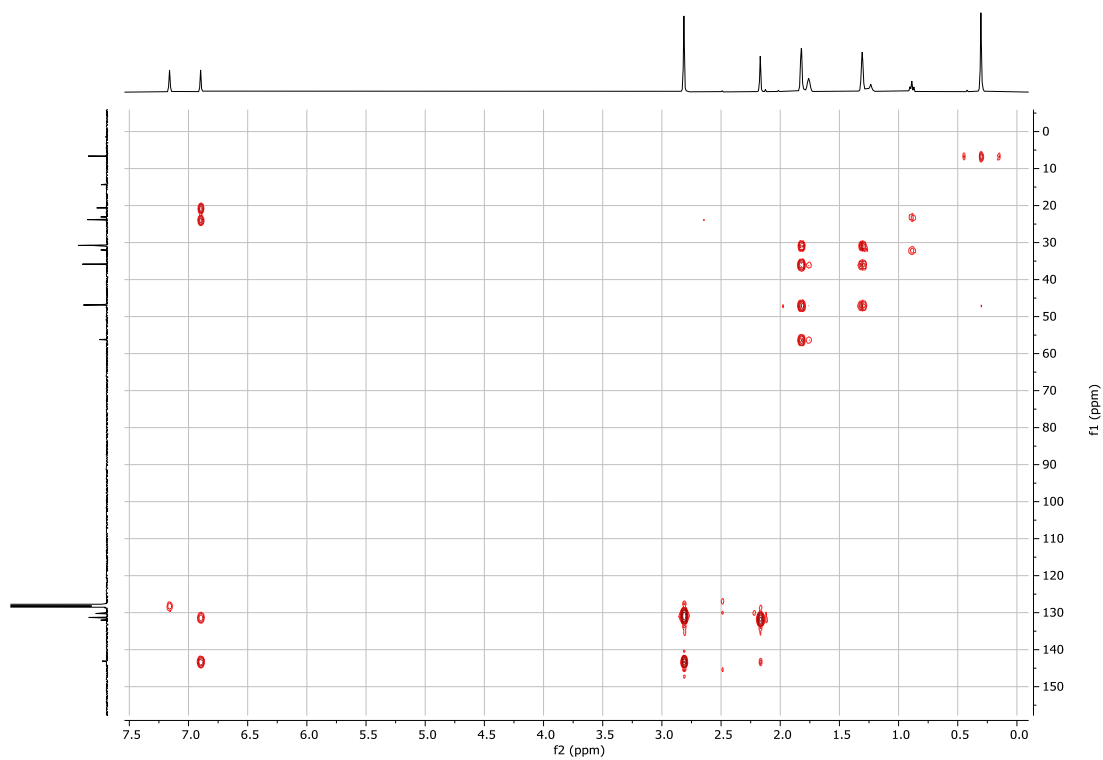

**Figure S28:** HMBC NMR spectrum (298 K, C<sub>6</sub>D<sub>6</sub>) of **2**.

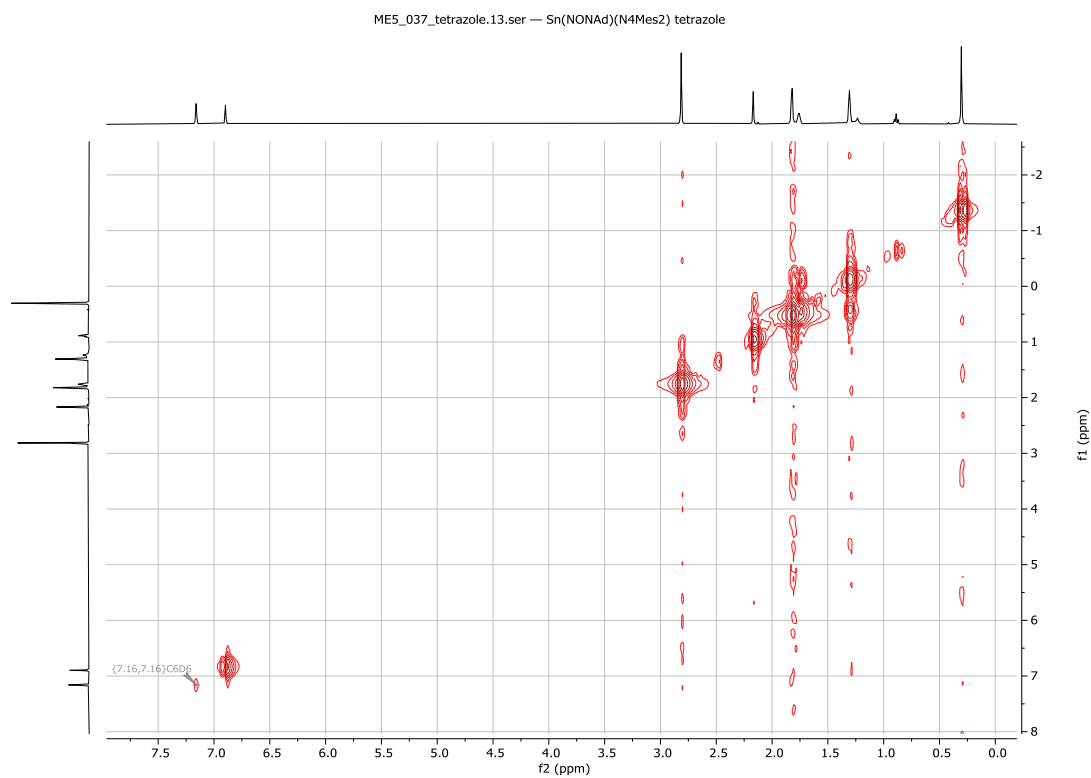

**Figure S29:** <sup>1</sup>H–<sup>1</sup>H COSY NMR spectrum (298 K, C<sub>6</sub>D<sub>6</sub>) of **2**.

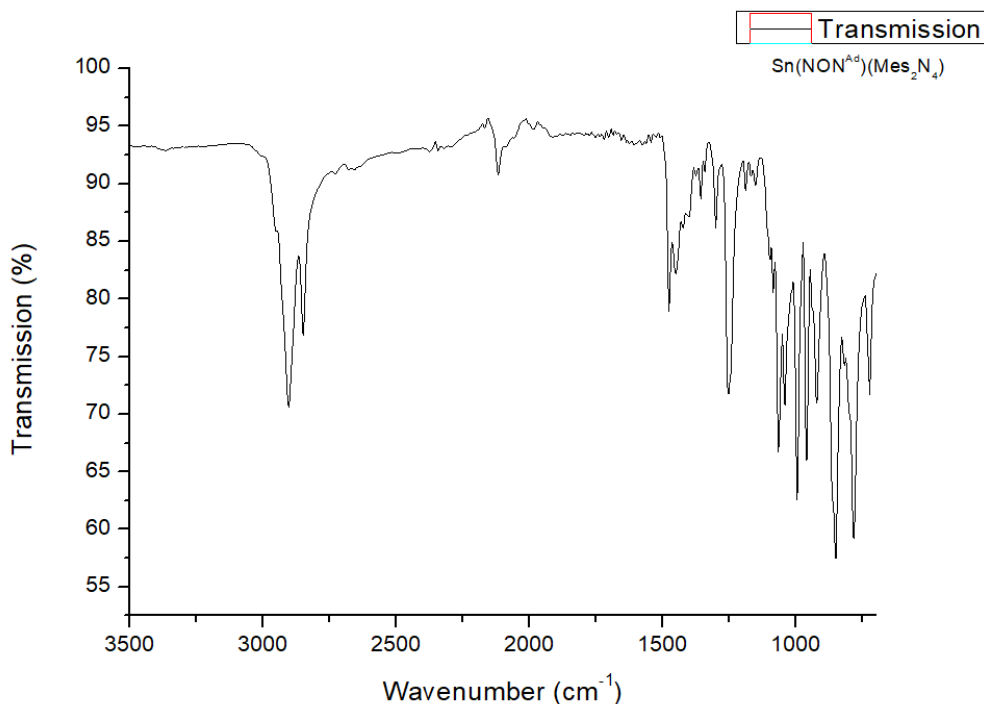

**Figure S30:** FT-IR spectrum of **2**.

#### *Preparation of (NON<sup>Ad</sup>)Sn=N(TCHP) (3)*

**1** (250 mg, 0.45 mmol) was charged to a flame-dried Schlenk flask and hexane (~3 mL) was added. The mixture was cooled to 0 °C and 2,4,6-tricyclohexylphenyl azide (166 mg, 0.45 mmol) in hexane (~2 mL) was added in one portion. The solution was allowed to stir at room temperature for 5 minutes to give a dark red solution accompanied by vigorous gas evolution. The solvent was reduced (~1-2 mL) *in vacuo* and stored at -30 °C to give dark red crystals. The supernatant was decanted and the crystals were dried *in vacuo*. Yield 180 mg, 45%.

**m.p.:** 138–140 °C (dec).

<sup>1</sup>H NMR (400 MHz, C<sub>7</sub>D<sub>8</sub>, 233 K): δ 0.33 (s, 12H, SiMe<sub>2</sub>), 1.18 – 1.49 (m, 14H, Cy-H), 1.50 – 1.68 (m, 8H, Cy-H), 1.67 – 1.79 (m, 12H, Ad-H), 1.80 – 2.02 (m, 18H, Ad-H), 2.15 – 2.36 (m, 6H, Cy-H), 2.48 – 2.65 (m, 2H), 2.95 – 3.12 (m, 2H, Cy-H), 3.34 – 3.52 (m, 1H, Cy-H), 7.14 (s, 2H, Ar-H).

<sup>13</sup>C{<sup>1</sup>H} NMR (101 MHz, C<sub>7</sub>D<sub>8</sub>, 233 K): δ 5.8 (SiMe<sub>2</sub>), 27.1, 27.5, 28.3, 30.2 (Cy-C), 30.8 (Ad-C), 33.3, 34.1 (Cy-C), 35.6 (Ad-C), 36.5, 38.5, 42.4, 45.6, 46.6, 47.1 (Cy-C), 47.8, 53.0 (Ad-C), 121.4, 125.6, 138.6, 152.6 (Ar-C).

$^{29}\text{Si}\{^1\text{H}\}$  NMR (80 MHz,  $\text{C}_7\text{D}_8$ , 233 K):  $\delta$  -2.9 (*SiMe*<sub>2</sub>).

$^{119}\text{Sn}\{^1\text{H}\}$  NMR (149 MHz,  $\text{C}_7\text{D}_8$ , 233 K):  $\delta$  46.5 (*Sn*).

**IR**  $\text{v}/\text{cm}^{-1}$  (solid): 723 (s), 779 (s), 801 (w), 820 (w), 865 (s), 939 (w), 962 (m), 1003 (m), 1036 (w), 1070 (w), 1092 (w), 1118 (w), 1252 (s), 1301 (w), 1353 (m), 1446 (s), 2848 (s), 2904 (s).

**E.A.:** Anal. Calcd. for  $\text{C}_{48}\text{H}_{77}\text{N}_3\text{OSi}_2\text{Sn}$  (887.04): C, 64.99; H, 8.75; N, 4.74 %. Found: C, 62.97; H, 8.48; N, 4.10 %.

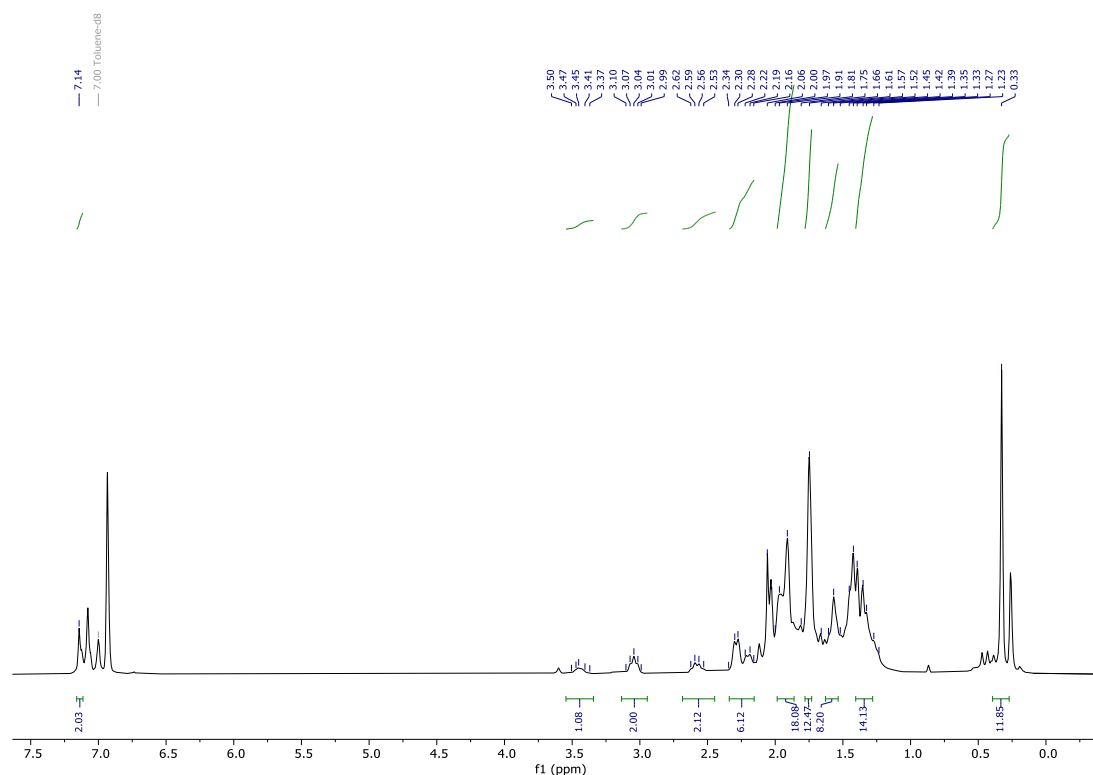

**Figure S31:**  $^1\text{H}$  NMR spectrum (400 MHz, 233 K,  $\text{C}_6\text{D}_6$ ) of **3**.

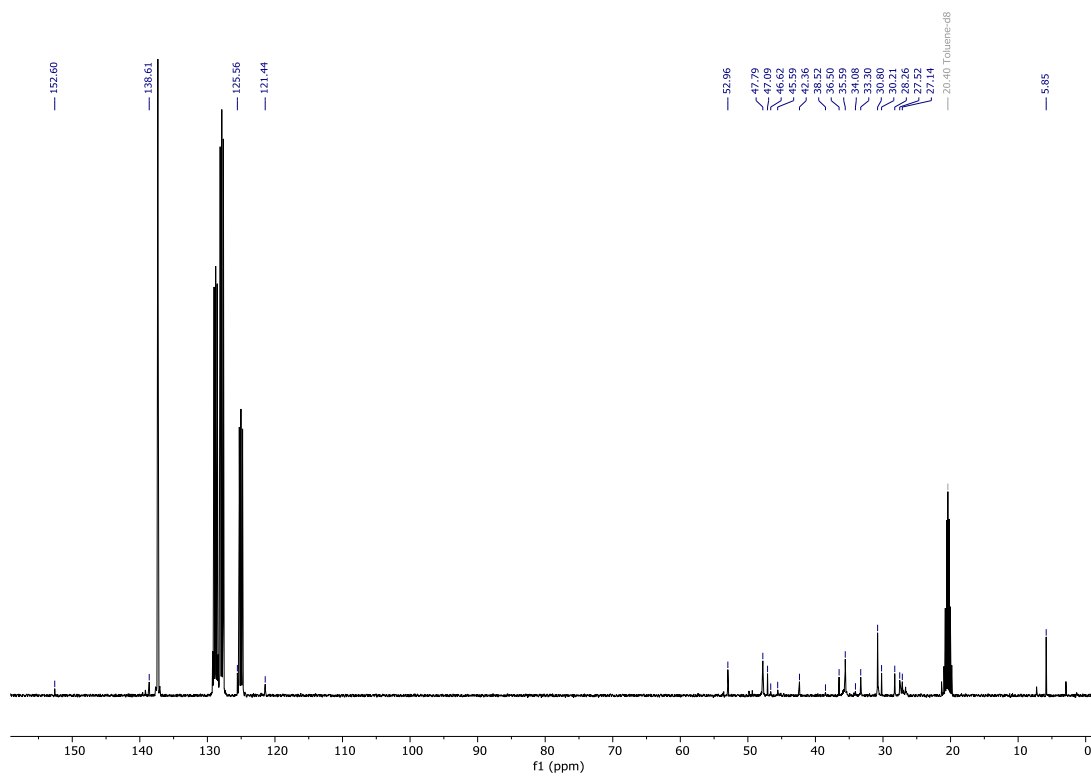

**Figure S32:**  $^{13}\text{C}\{^1\text{H}\}$  NMR spectrum (101 MHz, 233 K,  $\text{C}_6\text{D}_6$ ) of **3**.

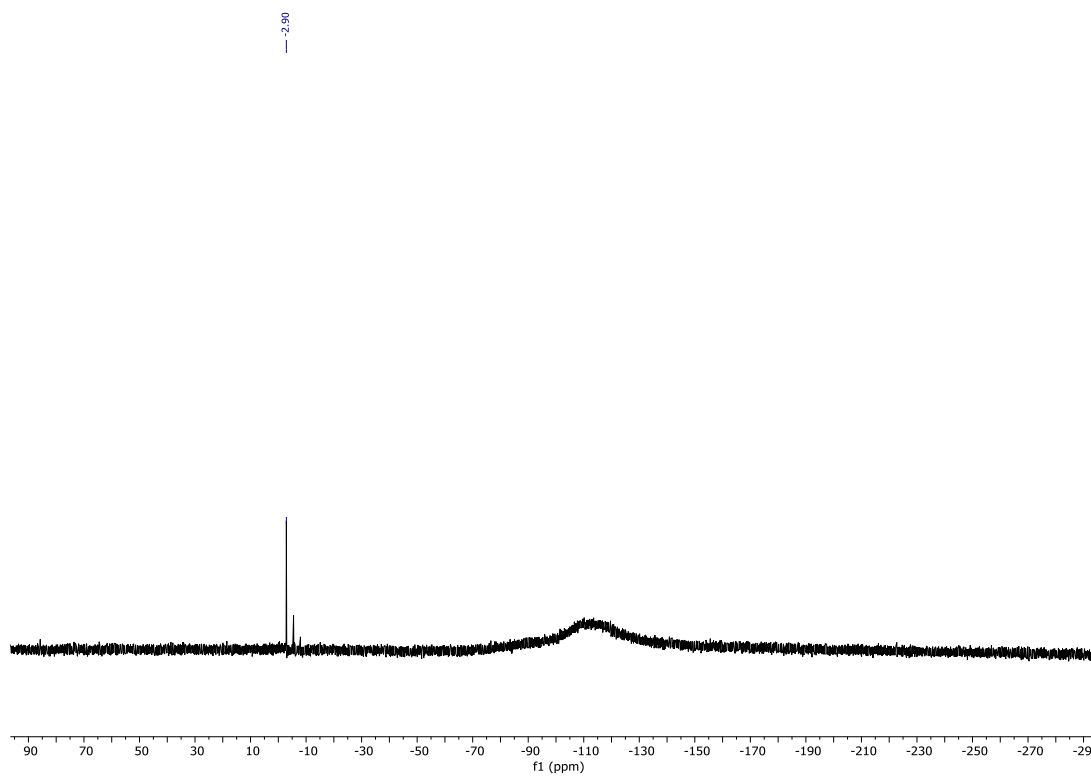

**Figure S33:**  $^{29}\text{Si}\{^1\text{H}\}$  NMR spectrum (80 MHz, 233 K,  $\text{C}_6\text{D}_6$ ) of **3**.

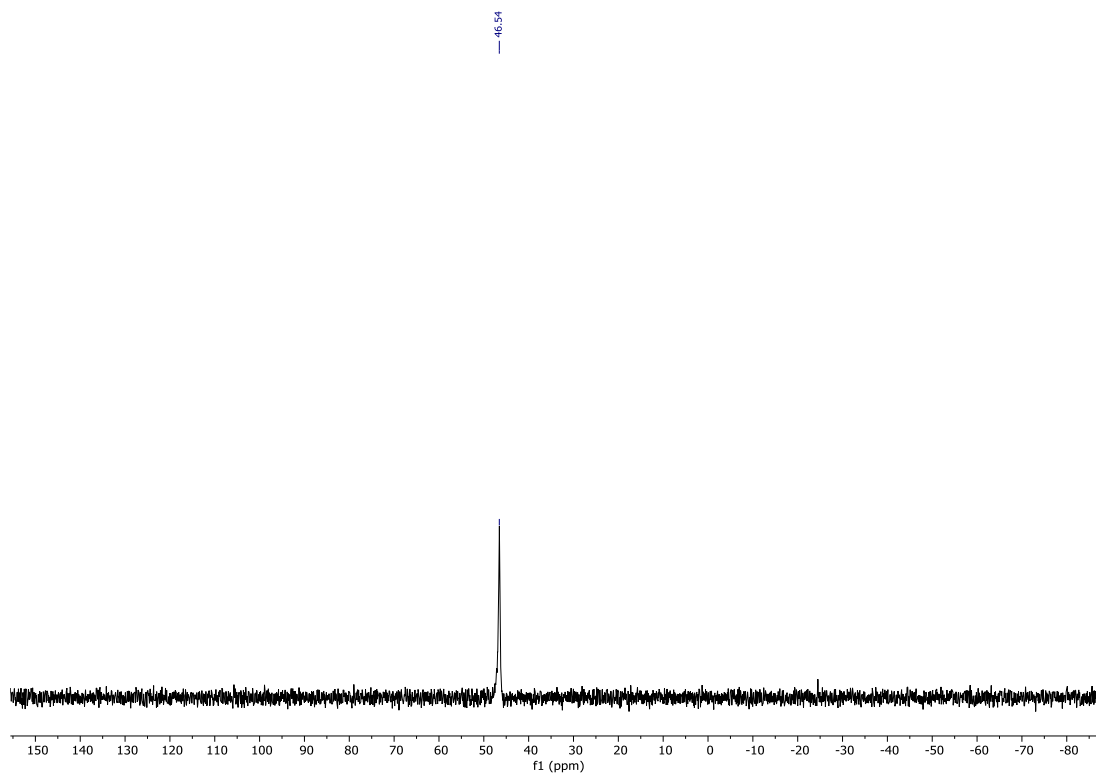

**Figure S34:**  $^{119}\text{Sn}\{^1\text{H}\}$  NMR spectrum (149 MHz, 233 K,  $\text{C}_6\text{D}_6$ ) of **3**.

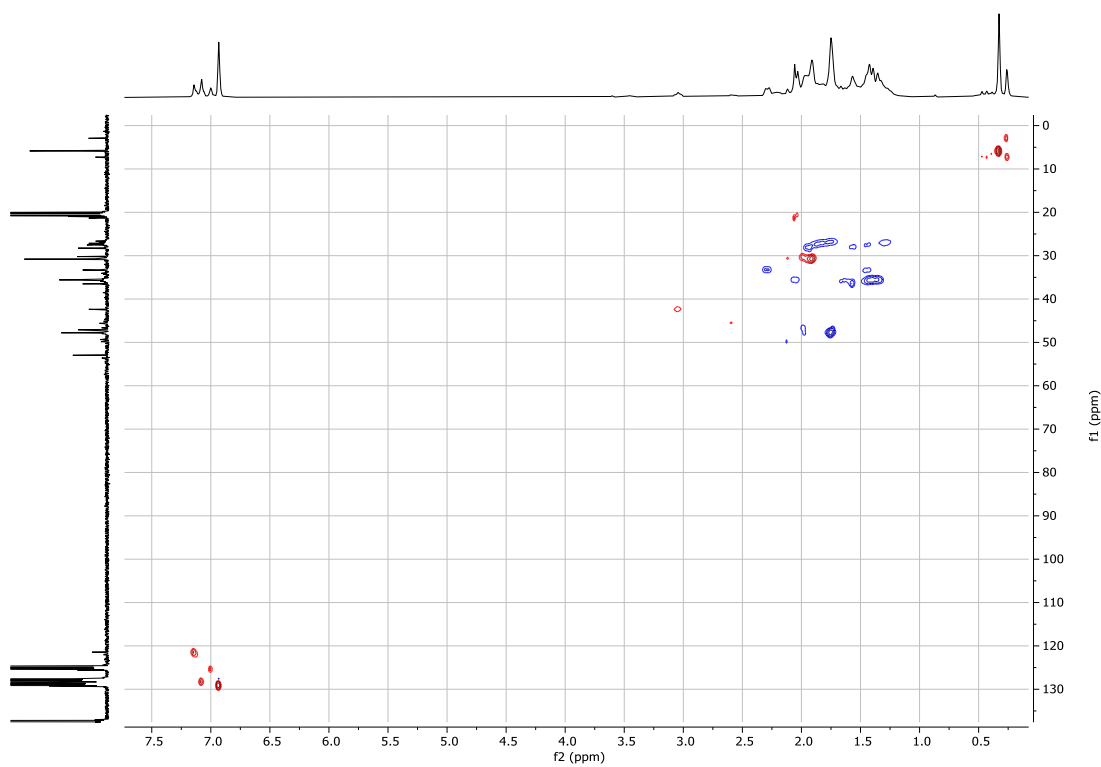

**Figure S35:** HSQC NMR spectrum (233 K,  $\text{C}_6\text{D}_6$ ) of **3**.



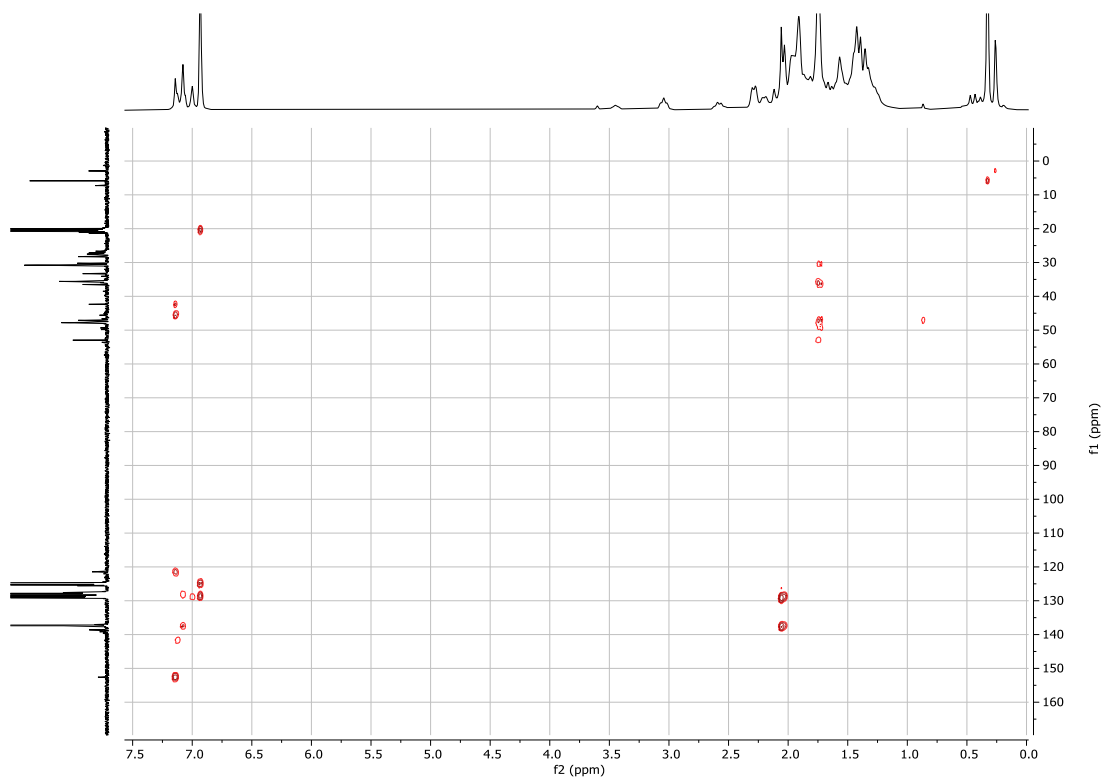

**Figure S36:** HMBC NMR spectrum (233 K, C<sub>6</sub>D<sub>6</sub>) of **3**.

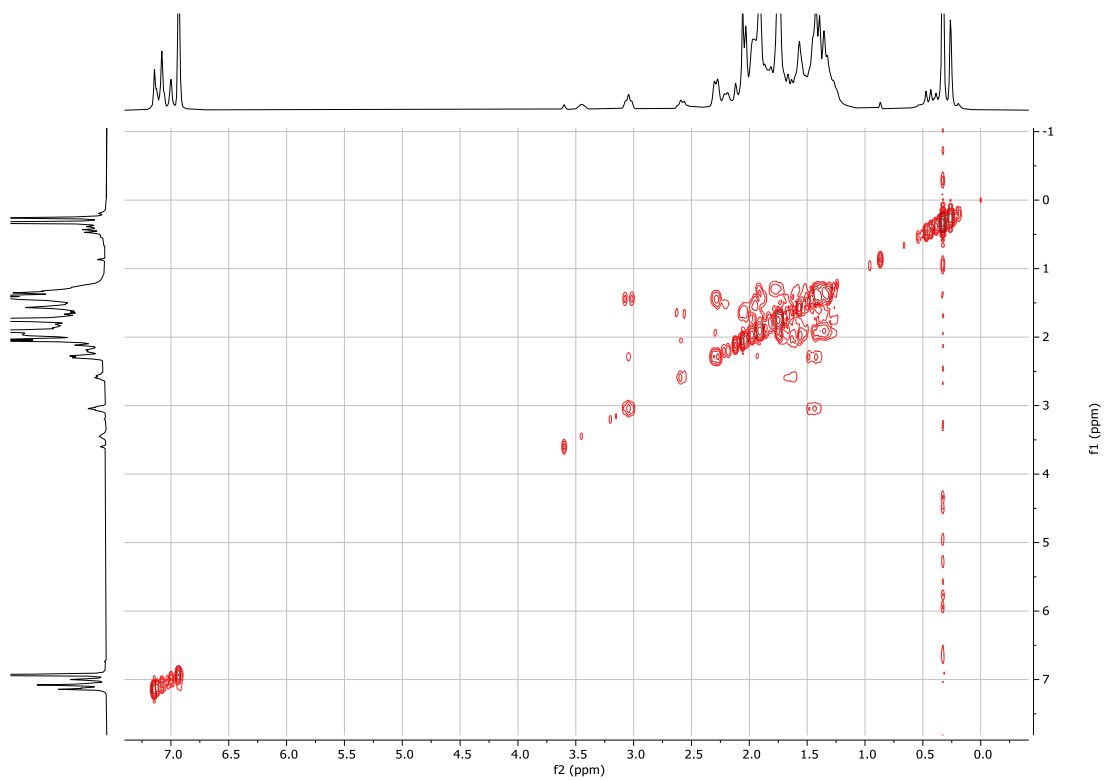

**Figure S37:** <sup>1</sup>H-<sup>1</sup>H COSY NMR spectrum (233 K, C<sub>6</sub>D<sub>6</sub>) of **3**.

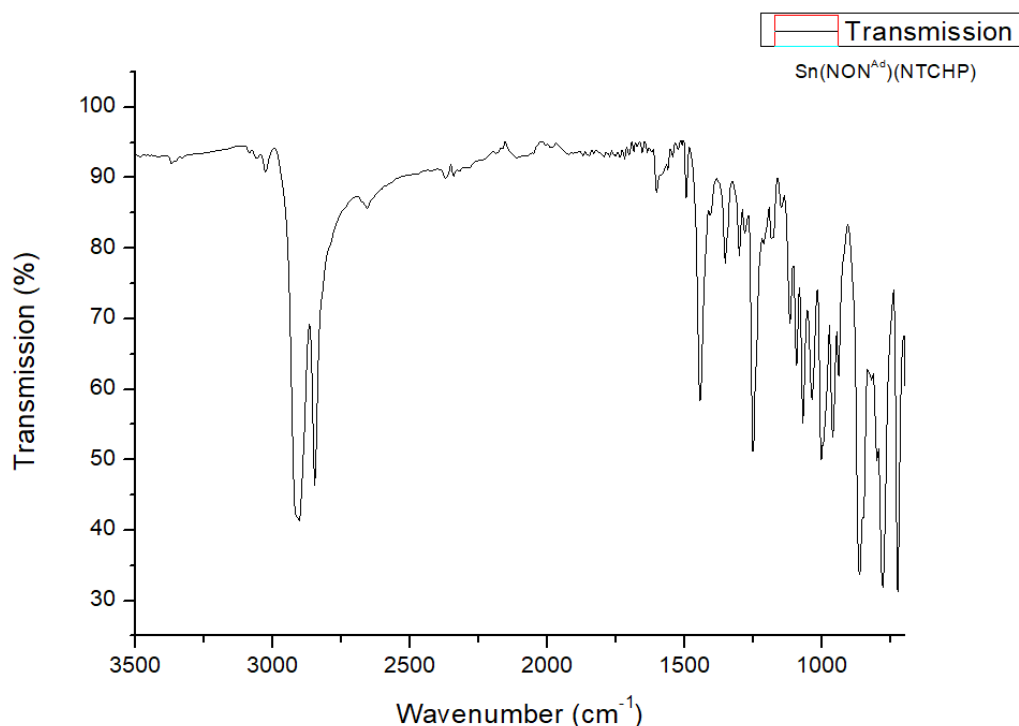

**Figure S38:** FT-IR spectrum of **3**.

**Preparation of  $(NON^{Ad})Sn\{NH(TCHP^H)\}$  (**4**)**

**1** (100 mg, 0.18 mmol) was charged to a flame-dried Schlenk flask and hexane (~3 mL) was added. 2,4,6-Tricyclohexylphenyl azide (66 mg, 0.18 mmol) in hexane (~2 mL) was added in one portion. The solution was gently heated at 60 °C for 15 minutes to give a clear orange solution (through a dark red intermediate, see above). The solvent was reduced (~1-2 mL) *in vacuo* and stored at room temperature to give colourless crystals that were washed with cold hexane. Yield 97 mg, 45%.

**m.p.:** 184–186 °C (dec).

**$^1H$  NMR** (400 MHz,  $C_6D_6$ ):  $\delta$  0.43 (s, 6H,  $SiMe_2$ ), 0.46 (s, 6H,  $SiMe_2$ ), 1.33 – 1.47 (m, 6H,  $Cy-H$ ), 1.48 – 1.54 (m, 12H,  $Ad-H$ ), 1.55 – 1.85 (m, 14H,  $Cy-H$ ), 1.86 – 2.03 (m, 18H,  $Ad-H$ ), 2.03 – 2.27 (m, 8H,  $Cy-H$ ), 2.43 – 2.63 (m, 4H,  $Cy-H$ ), 3.97 (s, 1H,  $NH$ ), 7.01 (s, 1H,  $Ar-H$ ), 7.13 (s, 1H,  $Ar-H$ ).

**$^{13}C\{^1H\}$  NMR** (101 MHz,  $C_6D_6$ ):  $\delta$  6.5, 8.4 ( $SiMe_2$ ), 26.5, 26.8, 26.9, 27.6, 27.8, 27.9 ( $Cy-C$ ), 31.0 ( $Ad-C$ ), 33.4, 35.8 ( $Cy-C$ ), 36.5 ( $Ad-C$ ), 37.8, 41.2, 45.2 ( $Cy-C$ ), 48.1, 53.0 ( $Ad-C$ ), 55.0 ( $Cy-C$ ), 121.7, 122.0, 130.3, 135.3, 135.6, 144.7 ( $Ar-C$ ).

$^{29}\text{Si}\{^1\text{H}\}$  NMR (80 MHz,  $\text{C}_6\text{D}_6$ ):  $\delta$  -3.9 ( $\text{SiMe}_2$ ).

$^{119}\text{Sn}\{^1\text{H}\}$  NMR (149 MHz,  $\text{C}_6\text{D}_6$ ):  $\delta$  -29.6 ( $\text{Sn}$ ).

IR  $\text{v}/\text{cm}^{-1}$  (solid): 723 (m), 786 (s), 816 (w), 865 (s), 939 (w), 962 (m), 988 (s), 1006 (m), 1096 (m), 1118 (m), 1249 (s), 1442 (s), 2844 (s), 2900 (s).

E.A.: Anal. Calcd. for  $\text{C}_{48}\text{H}_{77}\text{N}_3\text{OSi}_2\text{Sn}$  (887.04): C, 64.99; H, 8.75; N, 4.74 %. Found: C, 64.86; H, 8.86; N, 4.15 %.

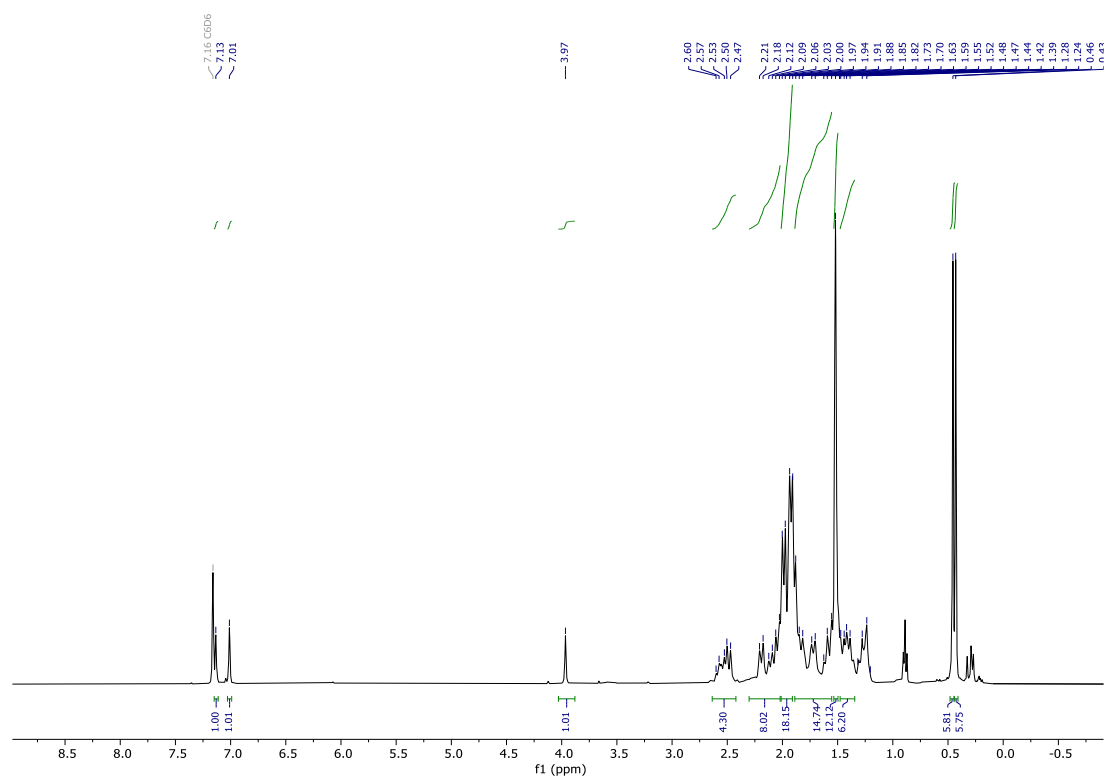

**Figure S39:**  $^1\text{H}$  NMR spectrum (400 MHz, 298 K,  $\text{C}_6\text{D}_6$ ) of **4**.

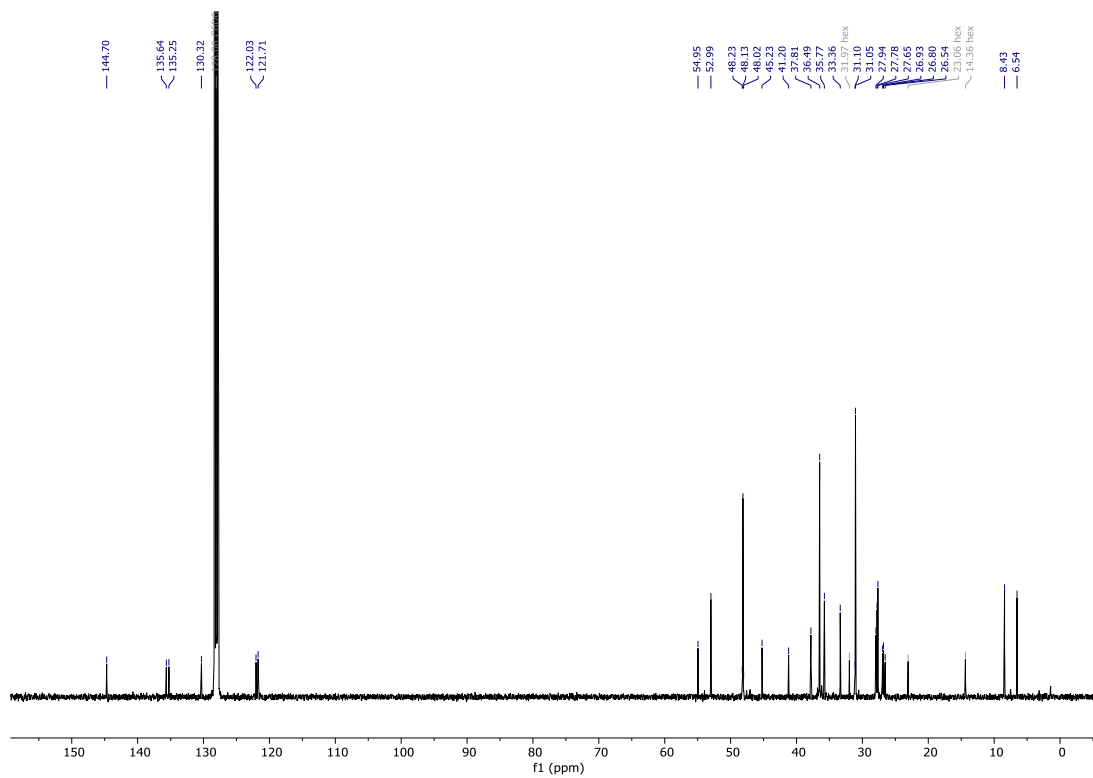

**Figure S40:**  $^{13}\text{C}\{^1\text{H}\}$  NMR spectrum (101 MHz, 298 K,  $\text{C}_6\text{D}_6$ ) of **4**.

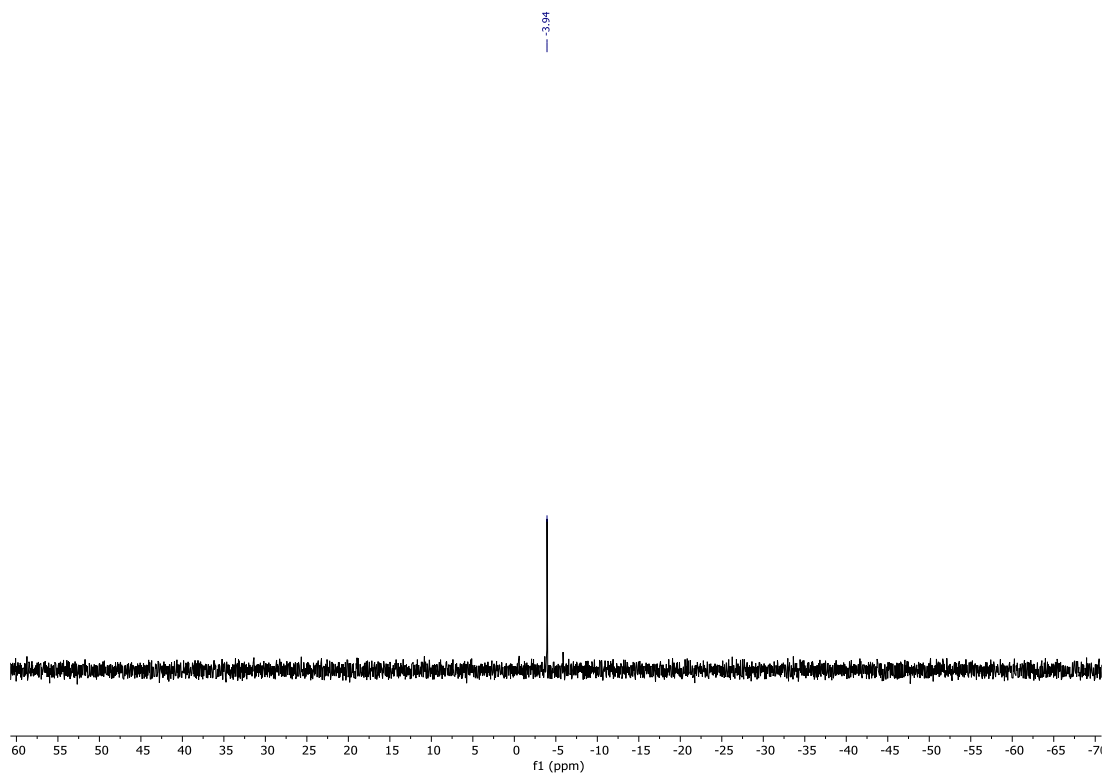

**Figure S41:**  $^{29}\text{Si}\{^1\text{H}\}$  NMR spectrum (80 MHz, 298 K,  $\text{C}_6\text{D}_6$ ) of **4**.

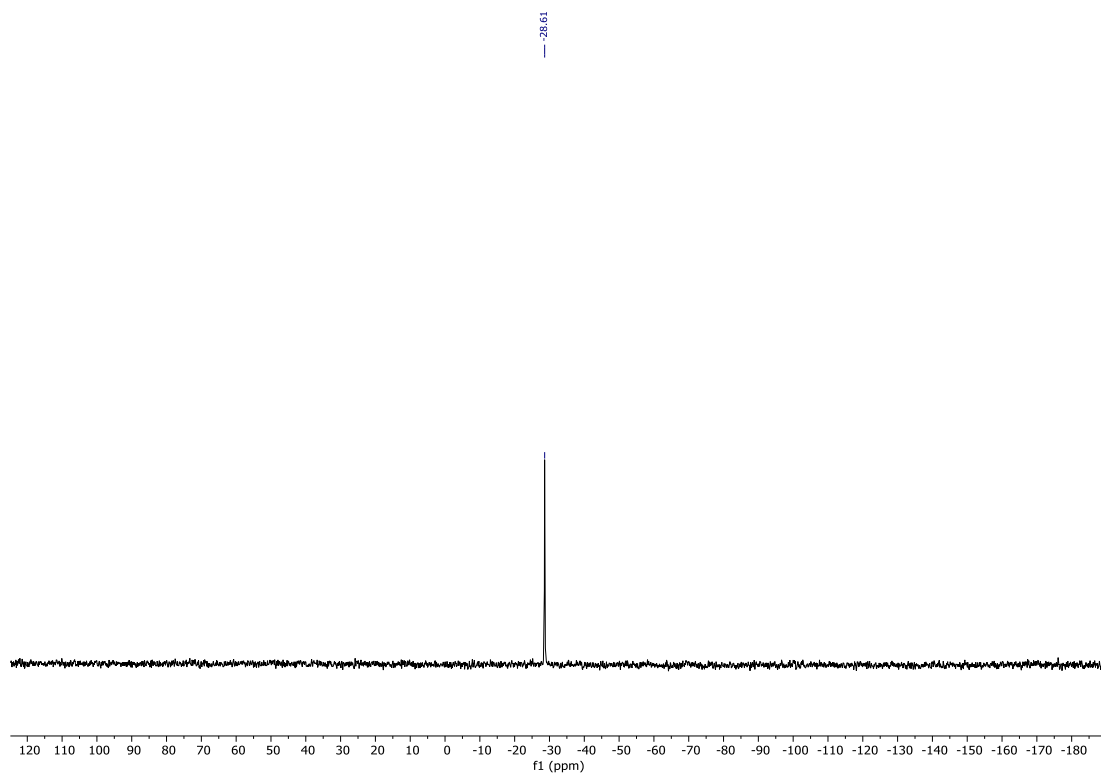

**Figure S42:**  $^{119}\text{Sn}\{^1\text{H}\}$  NMR spectrum (149 MHz, 298 K,  $\text{C}_6\text{D}_6$ ) of **4**.

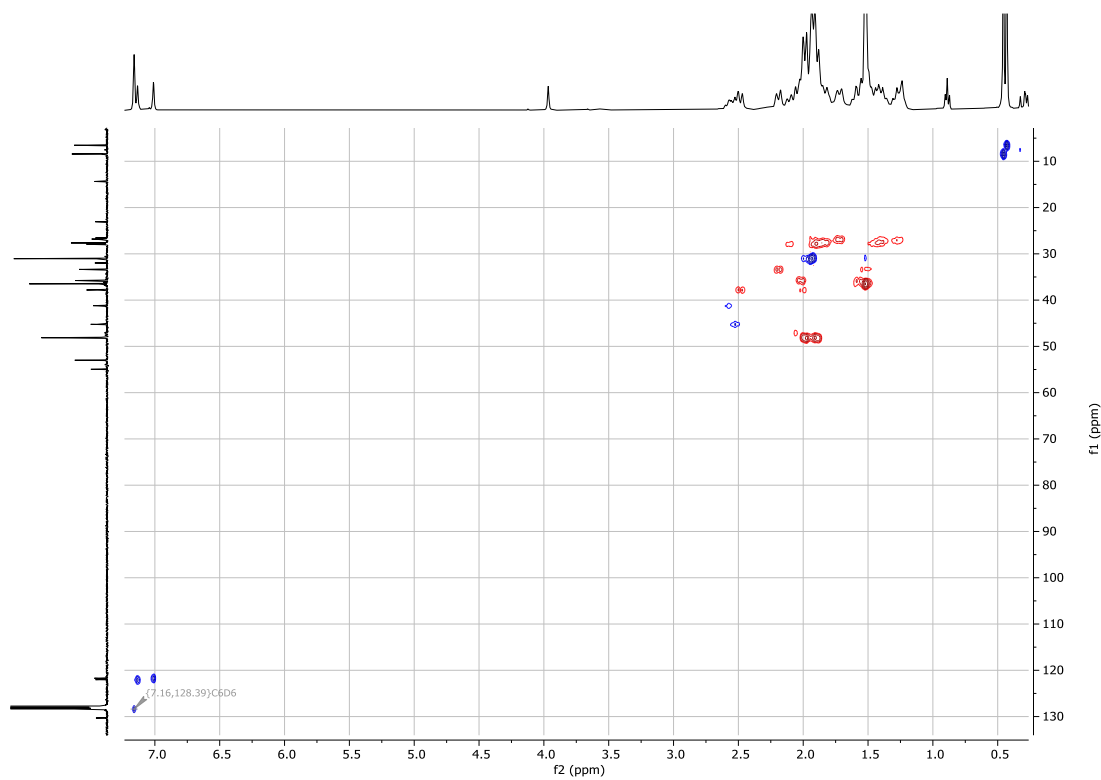

**Figure S43:** HSQC NMR spectrum (298 K,  $\text{C}_6\text{D}_6$ ) of **4**.

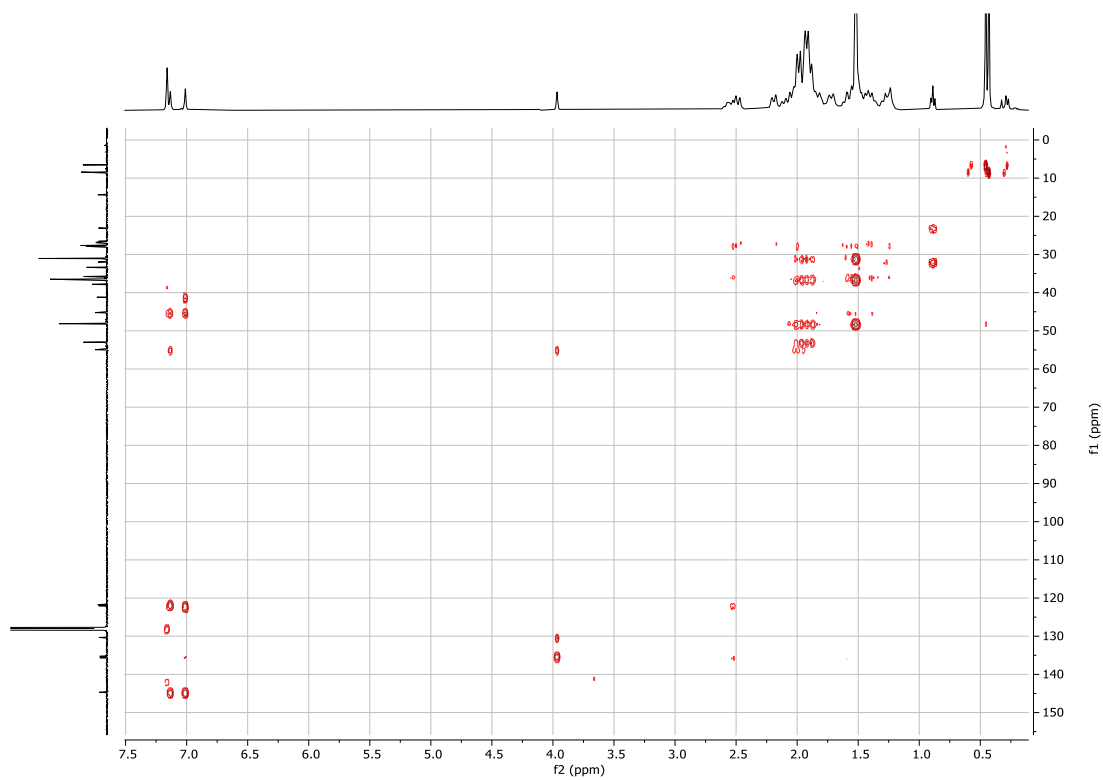

**Figure S44:** HMBC NMR spectrum (298 K, C<sub>6</sub>D<sub>6</sub>) of **4**.

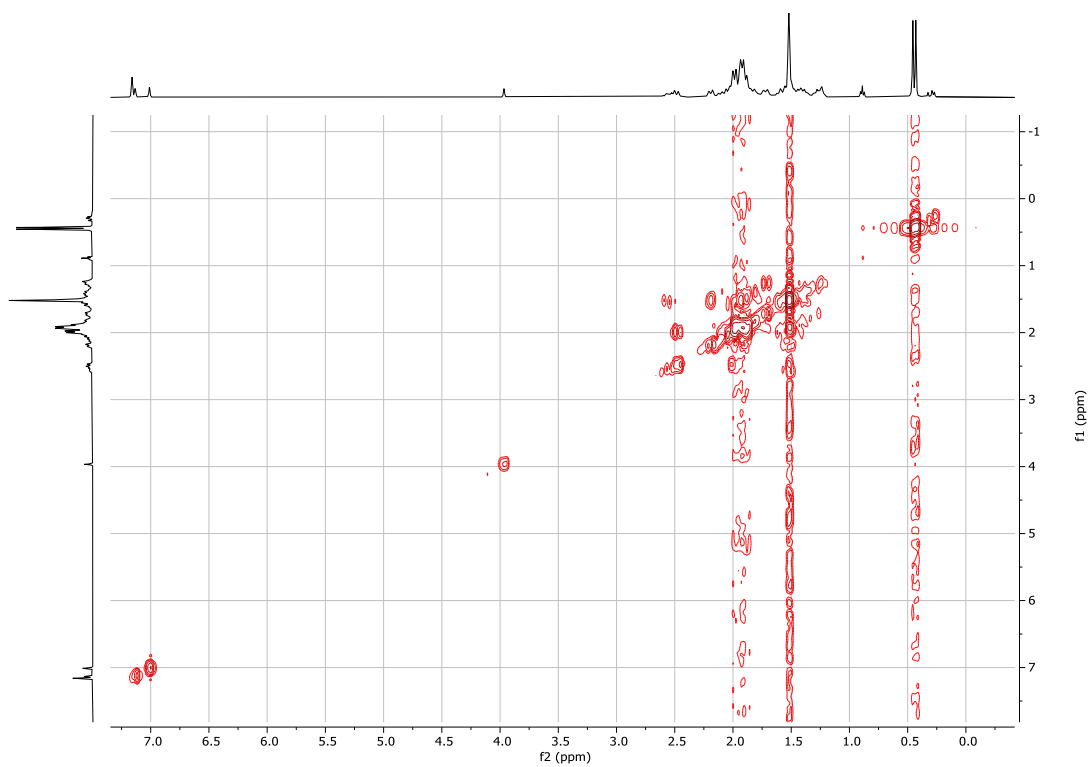

**Figure S45:** <sup>1</sup>H-<sup>1</sup>H COSY NMR spectrum (298 K, C<sub>6</sub>D<sub>6</sub>) of **4**.

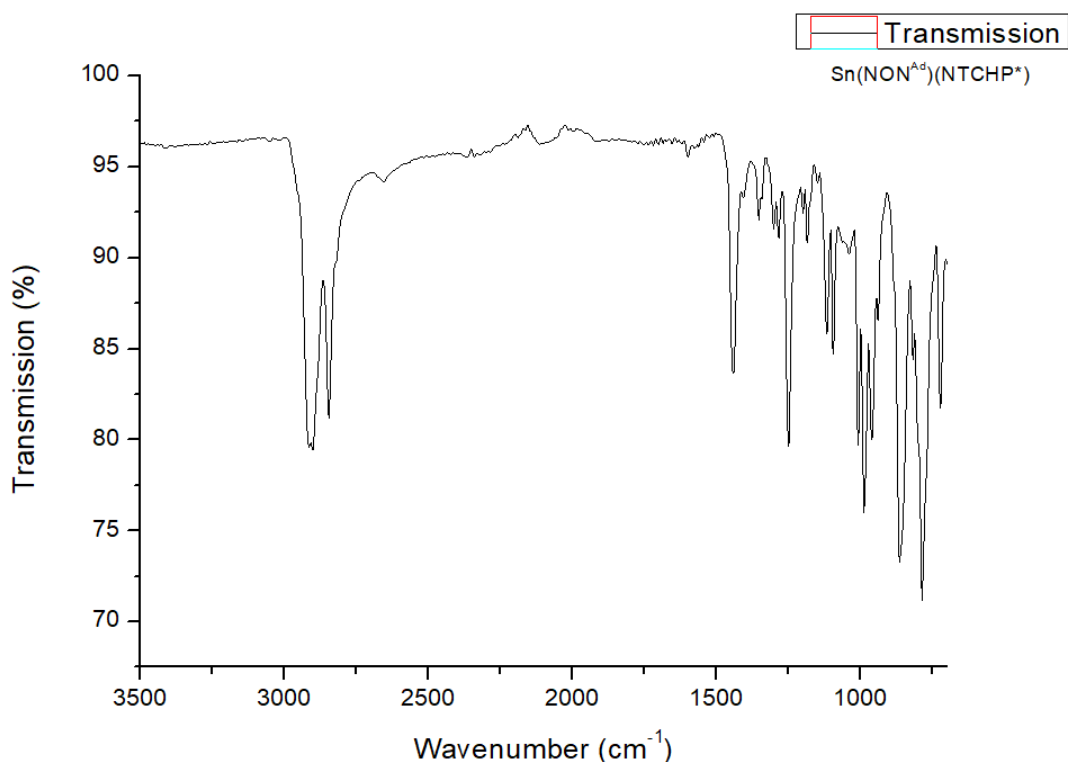

**Figure S46:** FT-IR spectrum of **4**.

#### Preparation of (NON<sup>Ad</sup>)Sn(OC(O)N(TCHP)) (**5**)

**1** (200 mg, 0.36 mmol) was charged to a flame-dried Schlenk flask and hexane (~3 mL) was added. The mixture was cooled to 0 °C and 2,4,6-tricyclohexylphenyl azide (133 mg, 0.36 mmol) in hexane (~2 mL) was added in one portion. The solution was allowed to stir at room temperature for 5 minutes to give a dark red solution accompanied by vigorous gas evolution. The mixture was degassed and an atmosphere of CO<sub>2</sub> (pre-dried over P<sub>2</sub>O<sub>5</sub>) was added to give a colourless solution (instant reaction). The solvent was reduced *in vacuo* to give a colourless suspension which was dissolved in toluene (~2 mL). Crystals were obtained from a saturated solution stored at room temperature. The supernatant was decanted and the crystals were dried *in vacuo*. Yield 171 mg, 51%.

**m.p.:** 172–174 °C (dec).

**<sup>1</sup>H NMR** (400 MHz, C<sub>6</sub>D<sub>6</sub>): δ 0.14 (s, 6H, SiMe<sub>2</sub>), 0.21 (s, 6H), 1.14 – 1.43 (m, 8H, Cy-H), 1.45 – 1.60 (m, 16H, Cy-H, Ad-H), 1.62 – 1.89 (m, 10H), 1.86 – 2.19 (m, 27H, Cy-H, Ad-H), 2.49 – 2.60 (m, 1H, Cy-H), 2.77 – 2.87 (m, 2H, Cy-H), 3.60 – 3.73 (m, 2H, Cy-H), 7.30 (s, 2H, Ar-H).

$^{13}\text{C}\{^1\text{H}\}$  NMR (101 MHz,  $\text{C}_6\text{D}_6$ ):  $\delta$  5.5, 5.9 ( $\text{SiMe}_2$ ), 26.6, 26.9, 27.2, 27.2, 27.4 ( $\text{Cy-C}$ ), 30.7 ( $\text{Ad-C}$ ), 33.7, 35.0 ( $\text{Cy-C}$ ), 35.9 ( $\text{Ad-C}$ ), 37.2, 38.9, 45.1 ( $\text{Cy-C}$ ), 49.2, 54.4 ( $\text{Ad-C}$ ), 122.9, 135.2, 146.2, 147.0 ( $\text{Ar-C}$ ), 160.8 ( $\text{NCO}_2$ ).

$^{29}\text{Si}\{^1\text{H}\}$  NMR (80 MHz,  $\text{C}_6\text{D}_6$ ):  $\delta$  4.6 ( $\text{SiMe}_2$ ).

$^{119}\text{Sn}\{^1\text{H}\}$  NMR (149 MHz,  $\text{C}_6\text{D}_6$ ):  $\delta$  -246.2 ( $\text{Sn}$ ).

**IR**  $\text{v}/\text{cm}^{-1}$  (solid): 723 (m), 775 (w), 805 (s), 842 (w), 861 (s), 924 (s), 965 (w), 980 (w), 1010 (w), 1066 (w), 1100 (w), 1148 (m), 1174 (w), 1252 (s), 1301 (m), 1446 (m), 1692 (s), 2848 (s), 2911 (s).

**E.A.:** Anal. Calcd. for  $\text{C}_{49}\text{H}_{77}\text{N}_3\text{O}_3\text{Si}_2\text{Sn}\cdot(\text{C}_7\text{H}_8)$  (1023.19): C, 65.74; H, 8.37; N, 4.11 %. Found: C, 65.97; H, 8.54; N, 3.85 %.

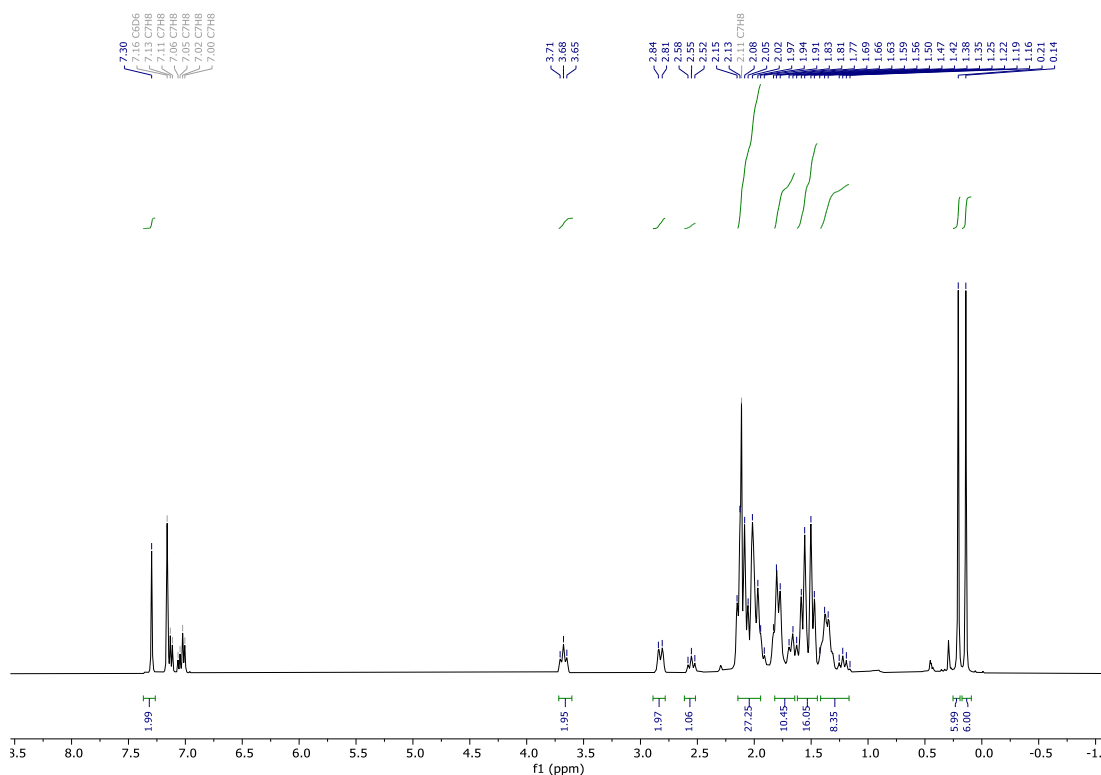

**Figure S47:**  $^1\text{H}$  NMR spectrum (400 MHz, 298 K,  $\text{C}_6\text{D}_6$ ) of **5**.



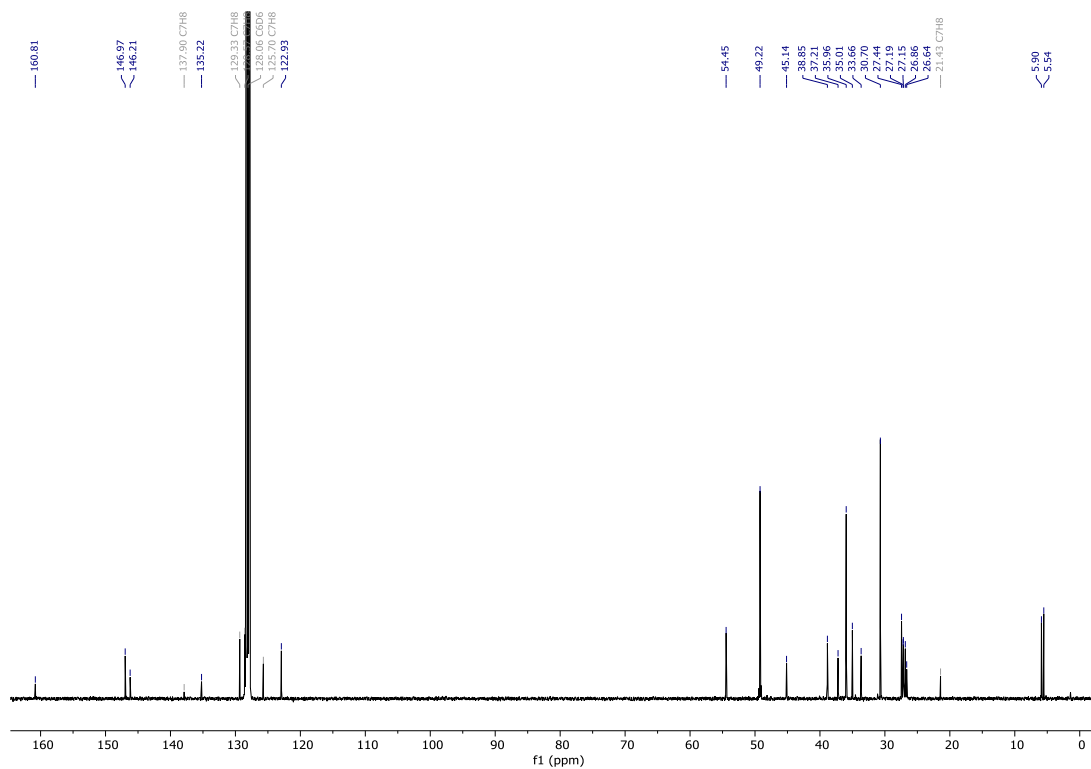

**Figure S48:**  $^{13}\text{C}\{^1\text{H}\}$  NMR spectrum (101 MHz, 298 K,  $\text{C}_6\text{D}_6$ ) of **5**.

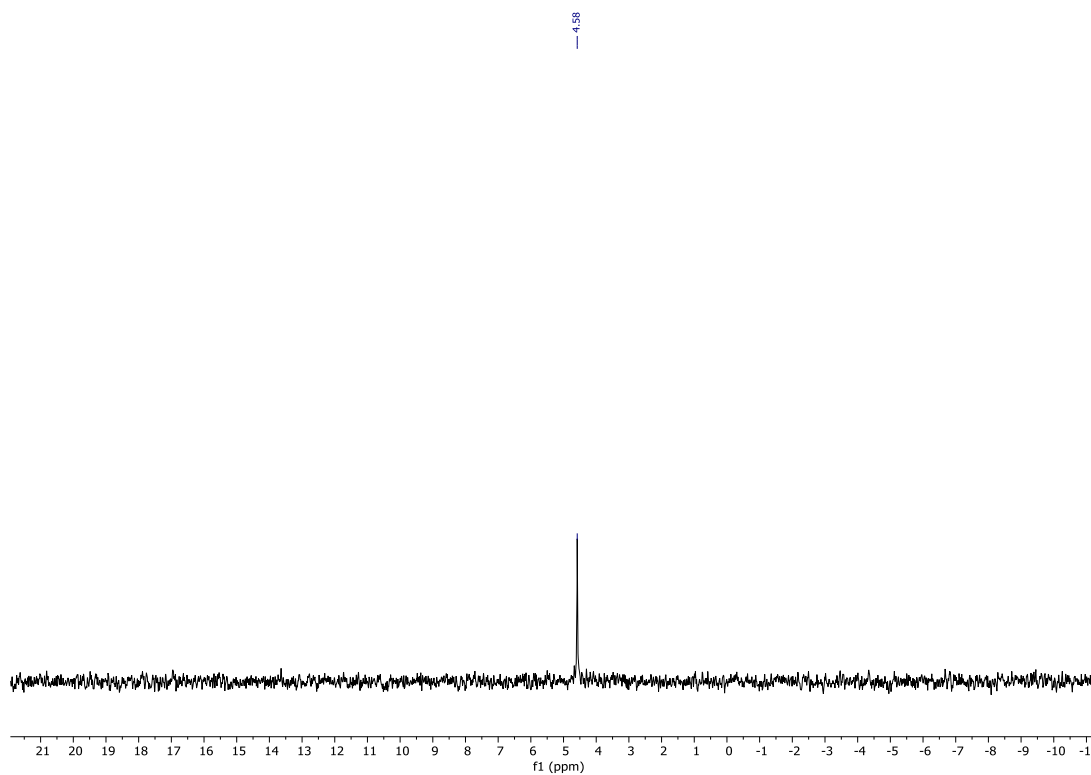

**Figure S49:**  $^{29}\text{Si}\{^1\text{H}\}$  NMR spectrum (80 MHz, 298 K,  $\text{C}_6\text{D}_6$ ) of **5**.

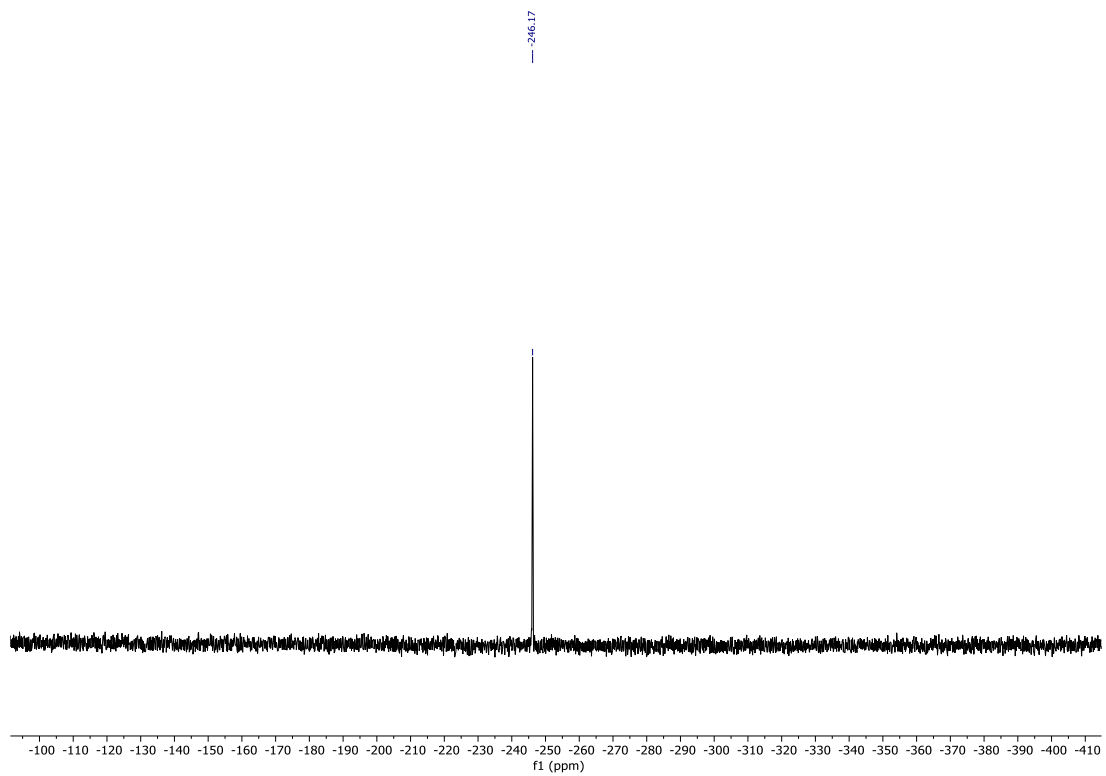

**Figure S50:**  $^{119}\text{Sn}\{^1\text{H}\}$  NMR spectrum (149 MHz, 298 K,  $\text{C}_6\text{D}_6$ ) of **5**.

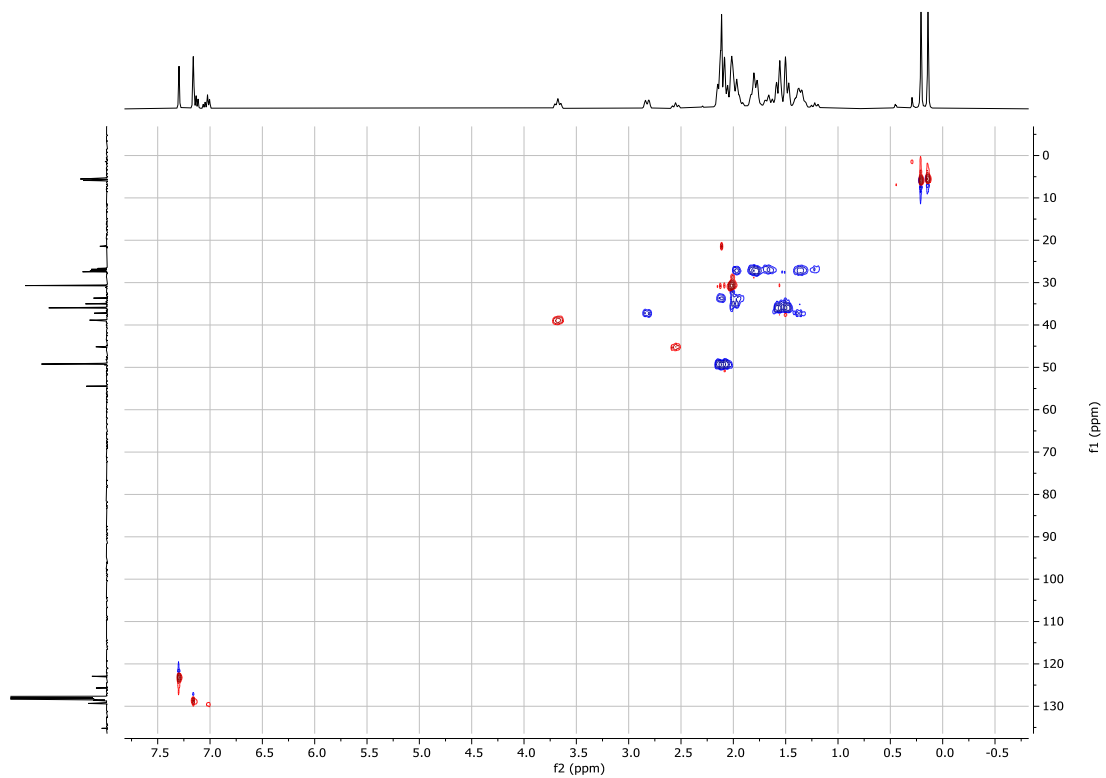

**Figure S51:** HSQC NMR spectrum (298 K,  $\text{C}_6\text{D}_6$ ) of **5**.

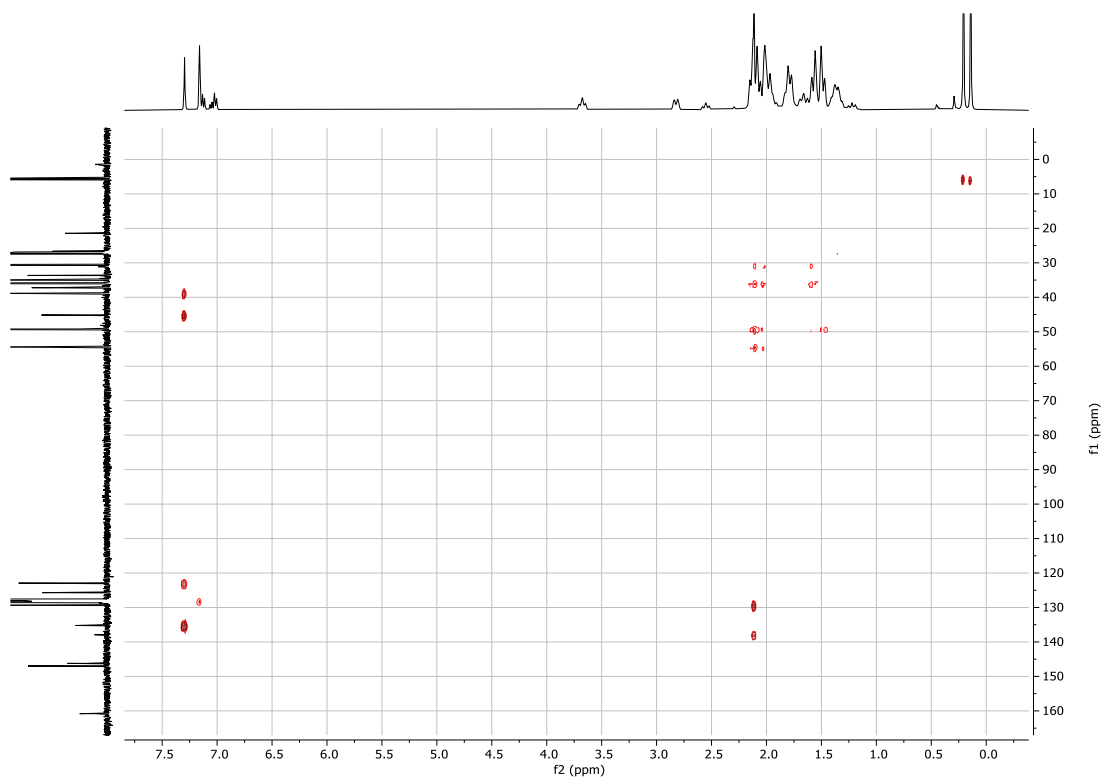

**Figure S52:** HMBC NMR spectrum (298 K, C<sub>6</sub>D<sub>6</sub>) of **5**.

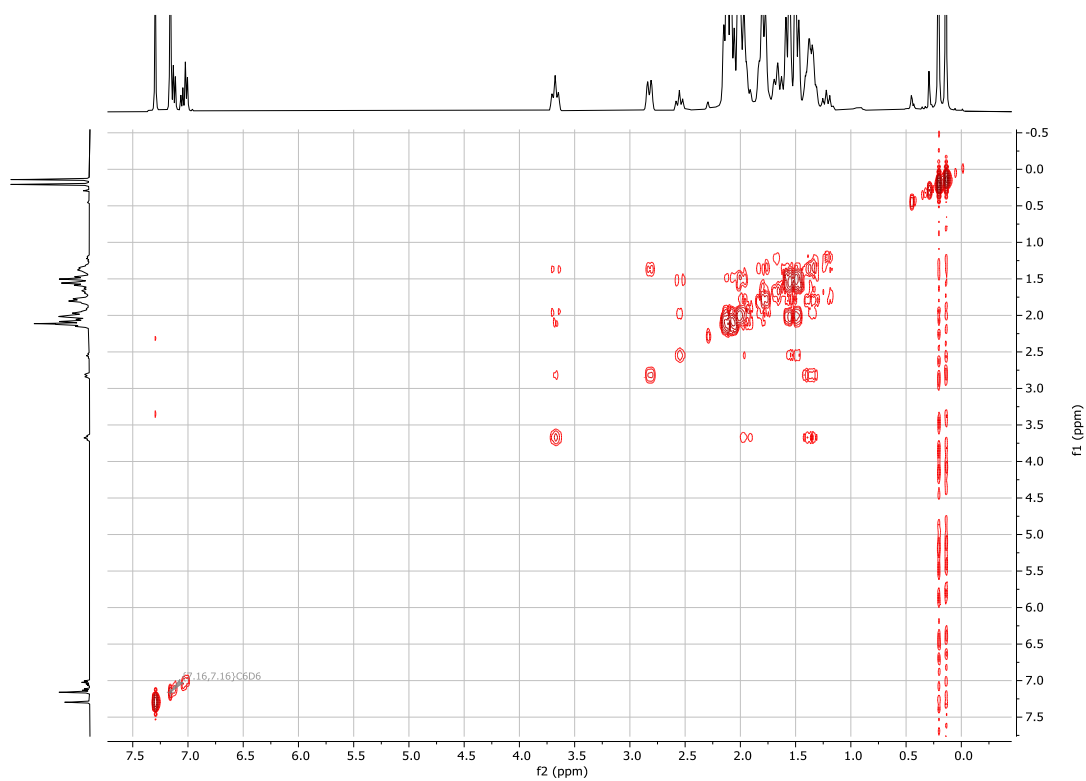

**Figure S53:** <sup>1</sup>H-<sup>1</sup>H COSY NMR spectrum (298 K, C<sub>6</sub>D<sub>6</sub>) of **5**.

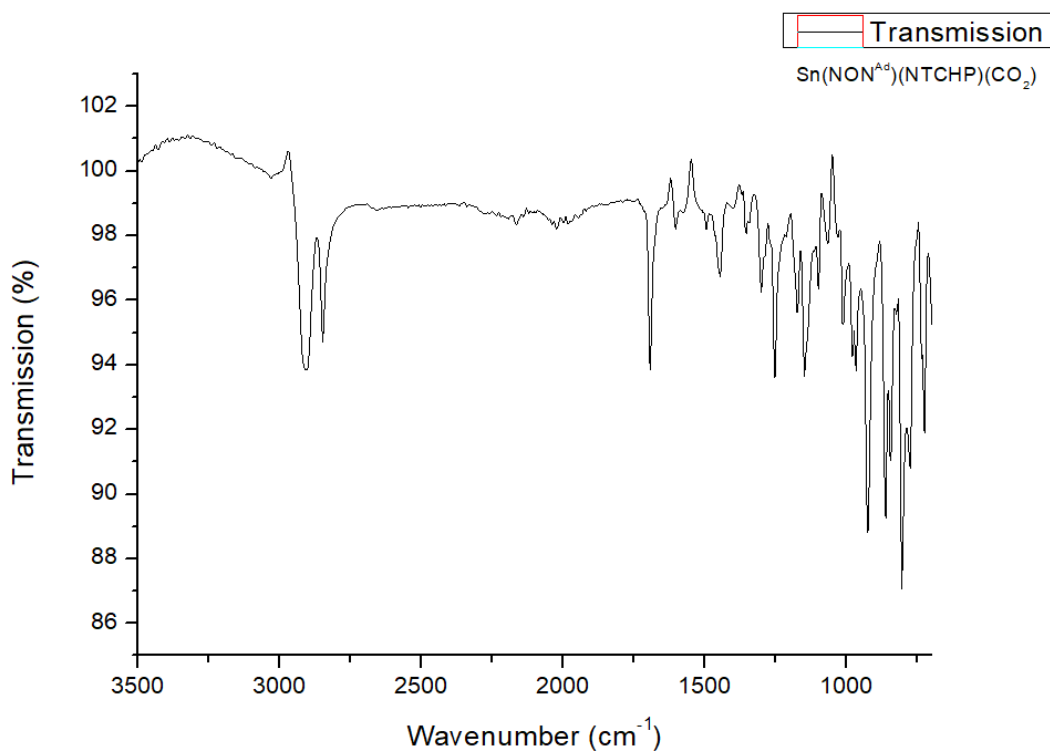

**Figure S54:** FT-IR spectrum of **5**.

#### Preparation of $[\text{Sn}(\text{NON}^{\text{Ad}})(\mu\text{-O})_2]$ (**6**)

A solution of **5** (30 mg, 0.03 mmol) was charged to a J Young fitted NMR tube and benzene- $\text{D}_6$  was added (~0.6 mL). The mixture was heated at 100 °C for 72 hours to give colourless crystals. The supernatant was decanted and the crystals were dried *in vacuo*. Yield 8 mg, 44%.

**m.p.:** >300 °C.

$^1\text{H}$  NMR (400 MHz,  $\text{CD}_2\text{Cl}_2$ ):  $\delta$  0.22 (s, 6H,  $\text{SiMe}_2$ ), 0.32 (s, 6H,  $\text{SiMe}_2$ ), 1.55 – 1.66 (m, 12H, Ad-*H*), 1.77 – 1.98 (m, 12H, Ad-*H*), 2.02 – 2.13 (m, 6H, Ad-*H*).

$^{13}\text{C}\{^1\text{H}\}$  NMR (101 MHz,  $\text{CD}_2\text{Cl}_2$ ):  $\delta$  5.9, 6.3 ( $\text{SiMe}_2$ ), 31.0, 36.5, 49.7, 53.4 (Ad-*C*).

$^{119}\text{Sn}\{^1\text{H}\}$  NMR (149 MHz,  $\text{CD}_2\text{Cl}_2$ ):  $\delta$  -157.4 (*Sn*).

**IR**  $\nu/\text{cm}^{-1}$  (solid): 731 (s), 786 (s), 801 (m), 824 (w), 850 (s), 865 (s), 954 (s), 969 (s), 1014 (s), 1100 (m), 1129 (s), 1144 (s), 1245 (m), 2848 (m), 2904 (s).

**E.A.:** Anal. Calcd. for  $\text{C}_{48}\text{H}_{84}\text{N}_4\text{O}_4\text{Si}_4\text{Sn}_2 \cdot (\text{C}_6\text{D}_6)_2$  (1299.29): C, 55.47; H, 8.38; N, 4.31 %. Found: C, 56.28; H, 7.38; N, 3.96 %.

\*Signals could not be detected in the  $^{29}\text{Si}\{^1\text{H}\}$  NMR spectrum after 1000 scans (5 second relaxation delay).

The supernatant from the reaction mixture was assayed by HRMS and shown to contain 2,4,6-tricyclohexylphenyl isocyanate and 1-adamantyl-3-(2,4,6-tricyclohexylphenyl)urea. Slow evaporation of this solution yielded a small number of crystals of the unsymmetrical urea suitable for X-ray diffraction analysis.

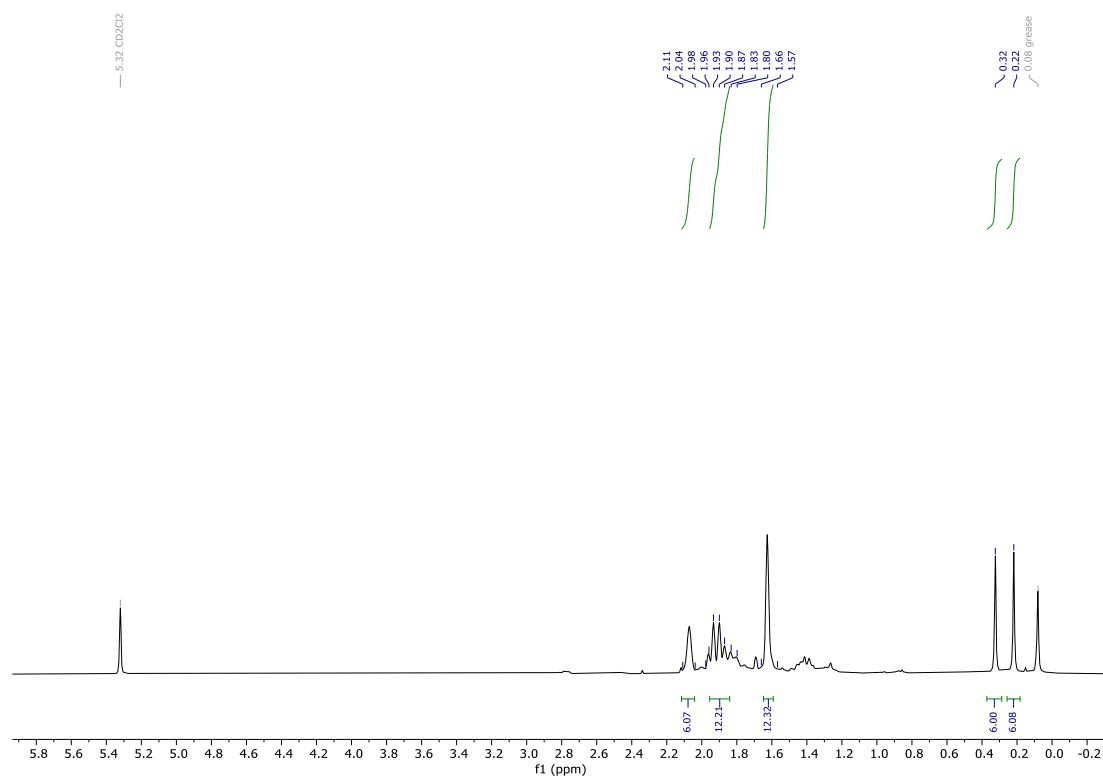

**Figure S55:**  $^1\text{H}$  NMR spectrum (400 MHz, 298 K,  $\text{CD}_2\text{Cl}_2$ ) of **6**.

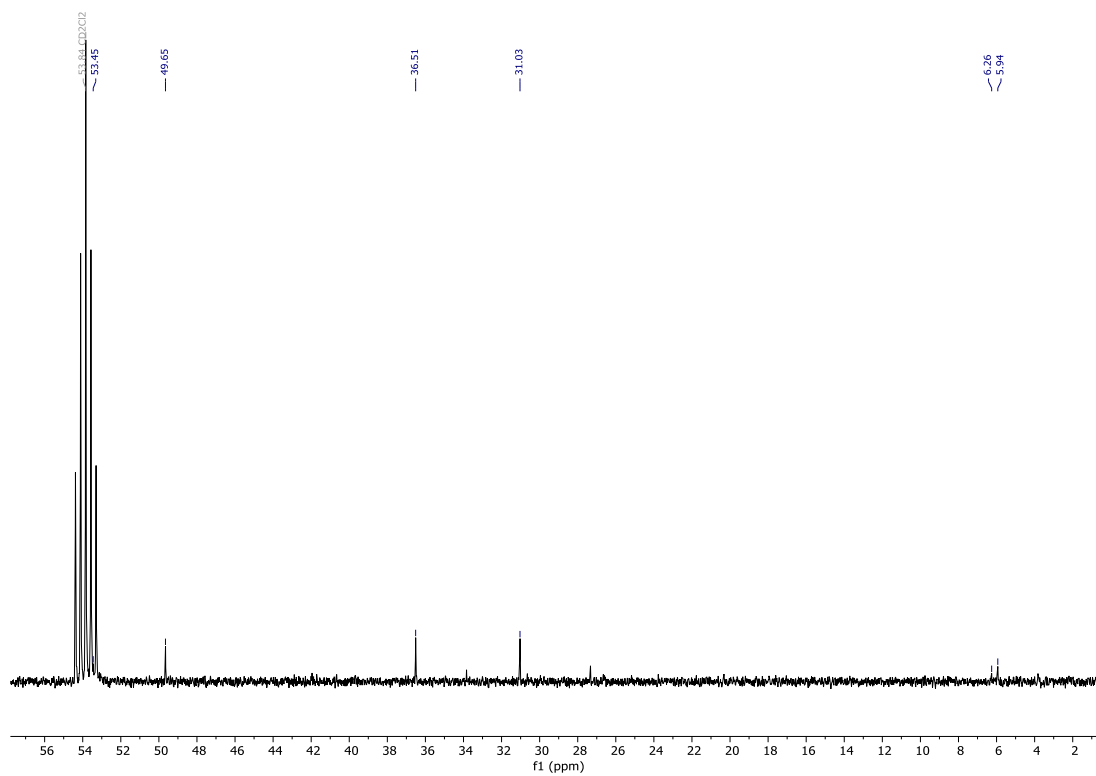

**Figure S56:**  $^{13}\text{C}\{^1\text{H}\}$  NMR spectrum (101 MHz, 298 K,  $\text{CD}_2\text{Cl}_2$ ) of **6**.

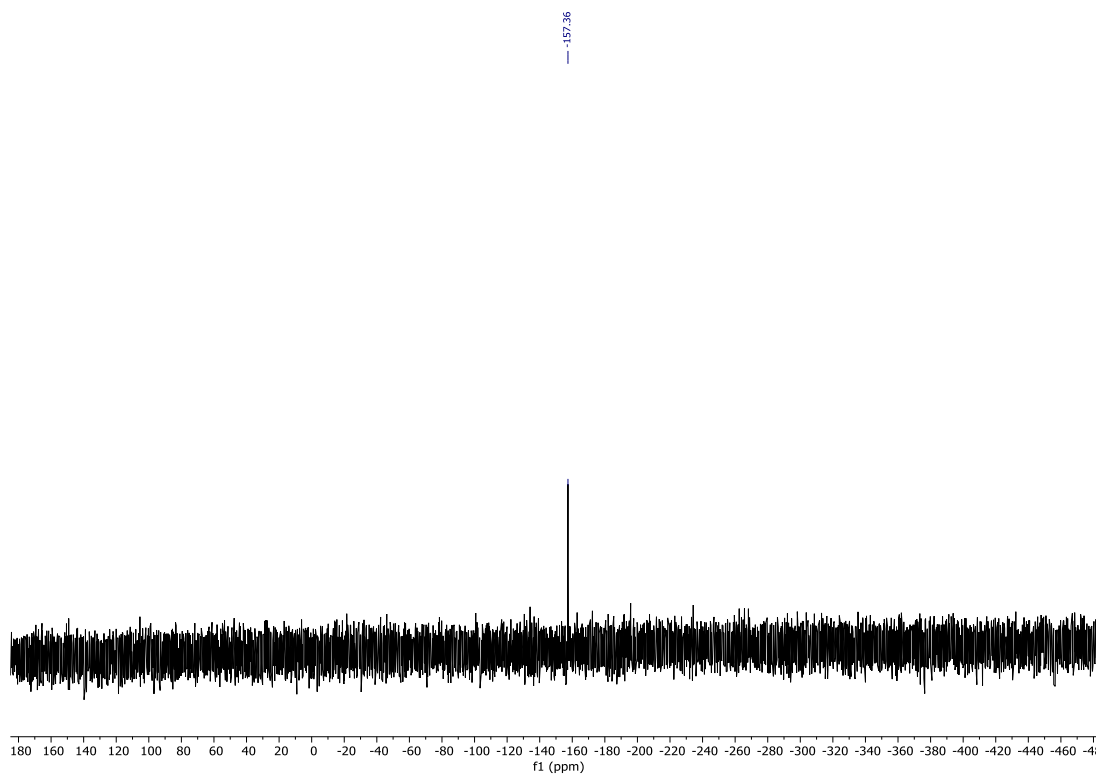

**Figure S57:**  $^{119}\text{Sn}\{^1\text{H}\}$  NMR spectrum (149 MHz, 298 K,  $\text{CD}_2\text{Cl}_2$ ) of **6**.

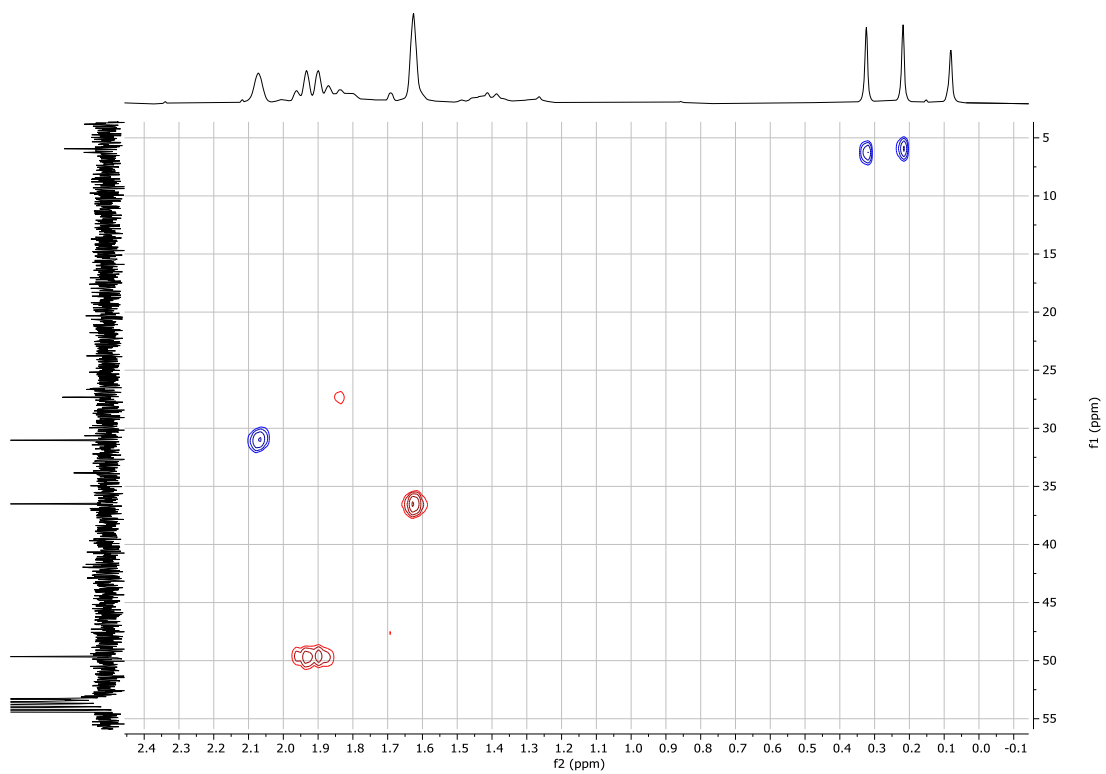

**Figure S58:** HSQC NMR spectrum (298 K,  $\text{CD}_2\text{Cl}_2$ ) of **6**.

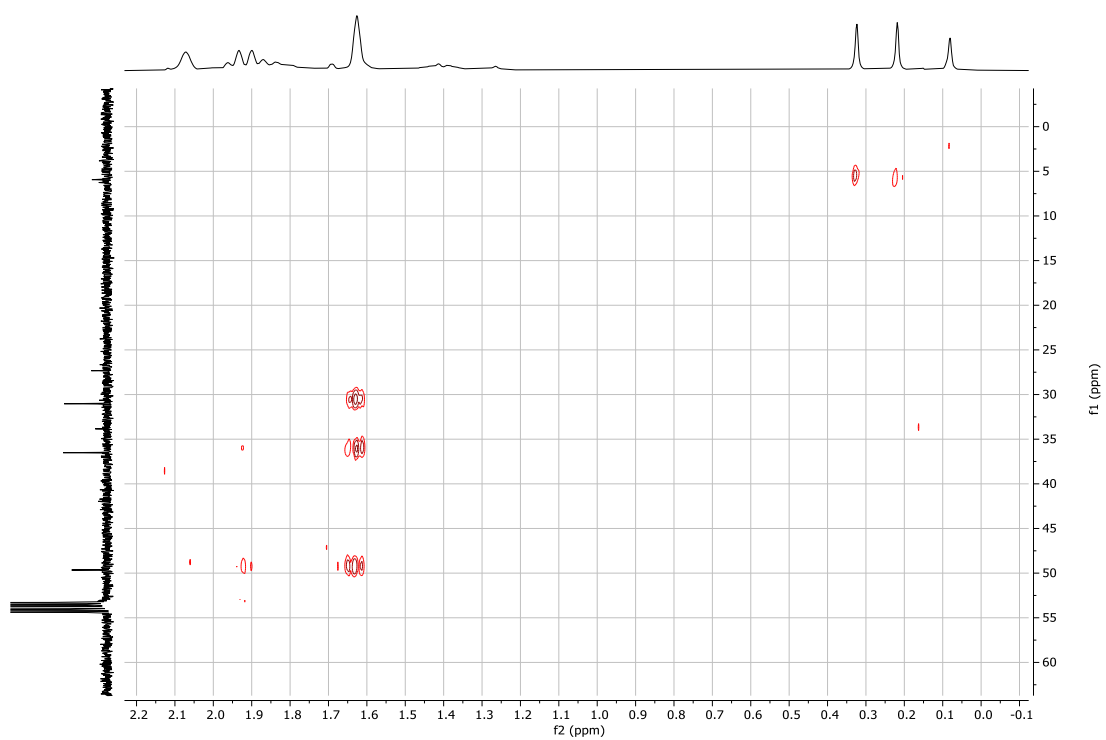

**Figure S59:** HMBC NMR spectrum (298 K,  $\text{CD}_2\text{Cl}_2$ ) of **6**.

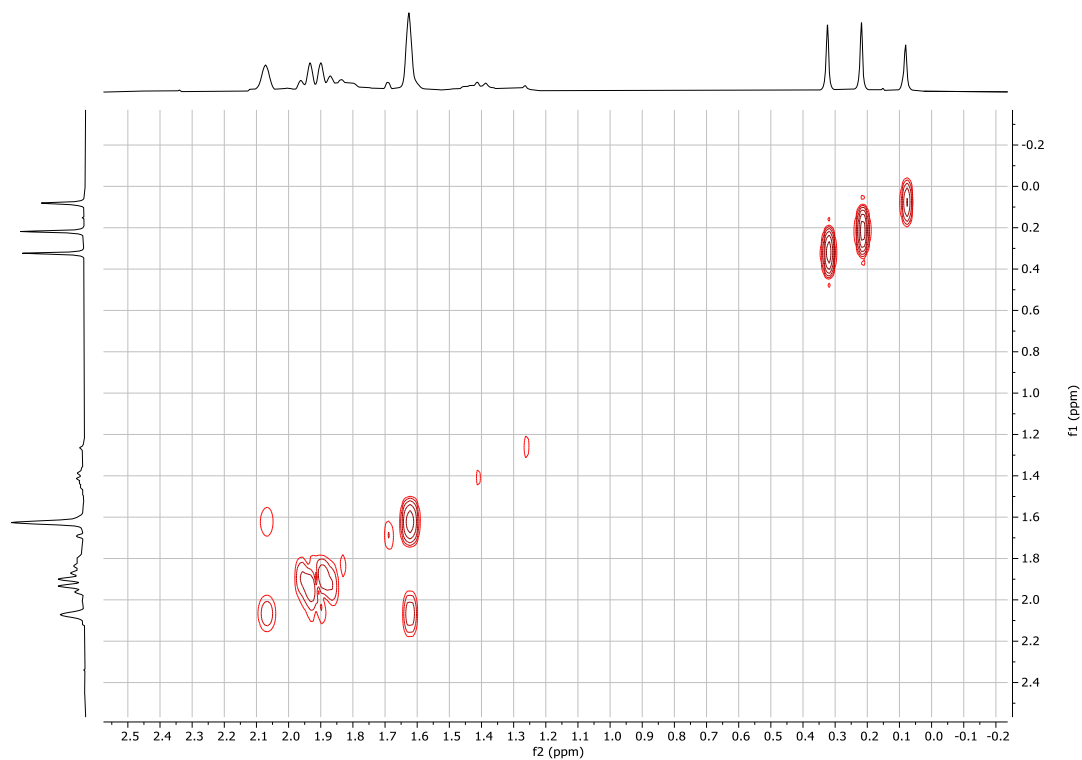

**Figure S60:**  $^1\text{H}$ - $^1\text{H}$  COSY NMR spectrum (298 K,  $\text{CD}_2\text{Cl}_2$ ) of **6**.

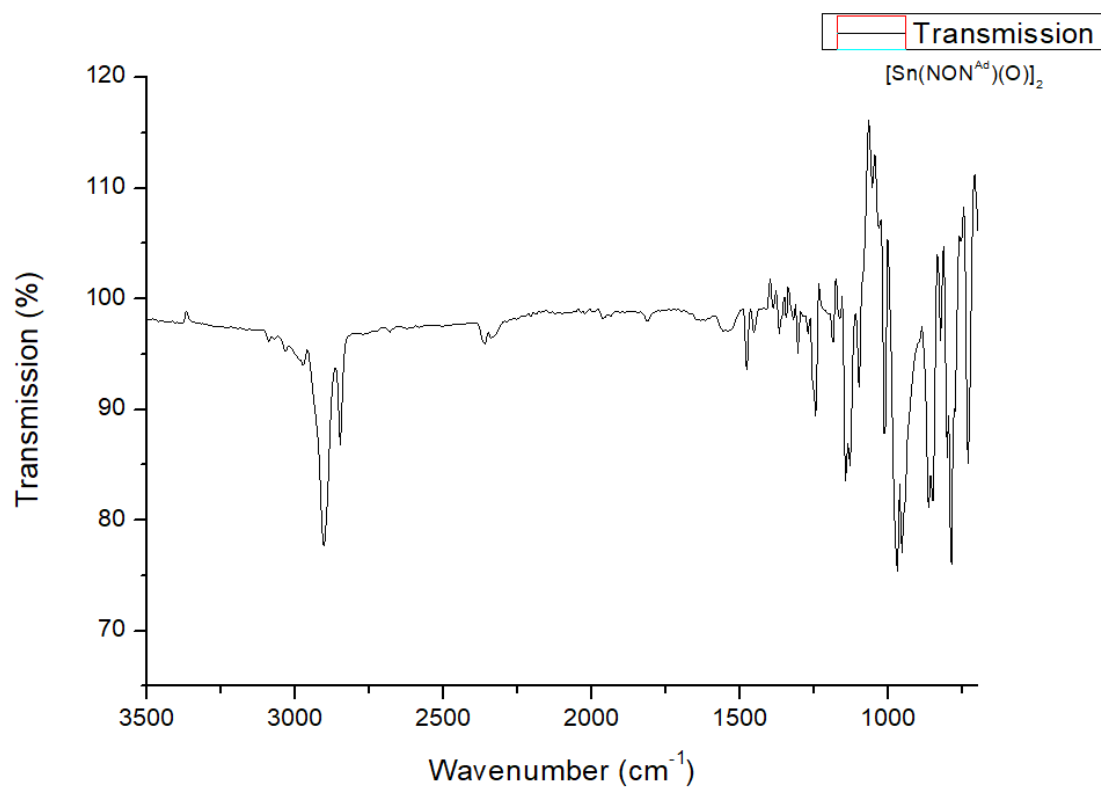

**Figure S61:** FT-IR spectrum of **6**.



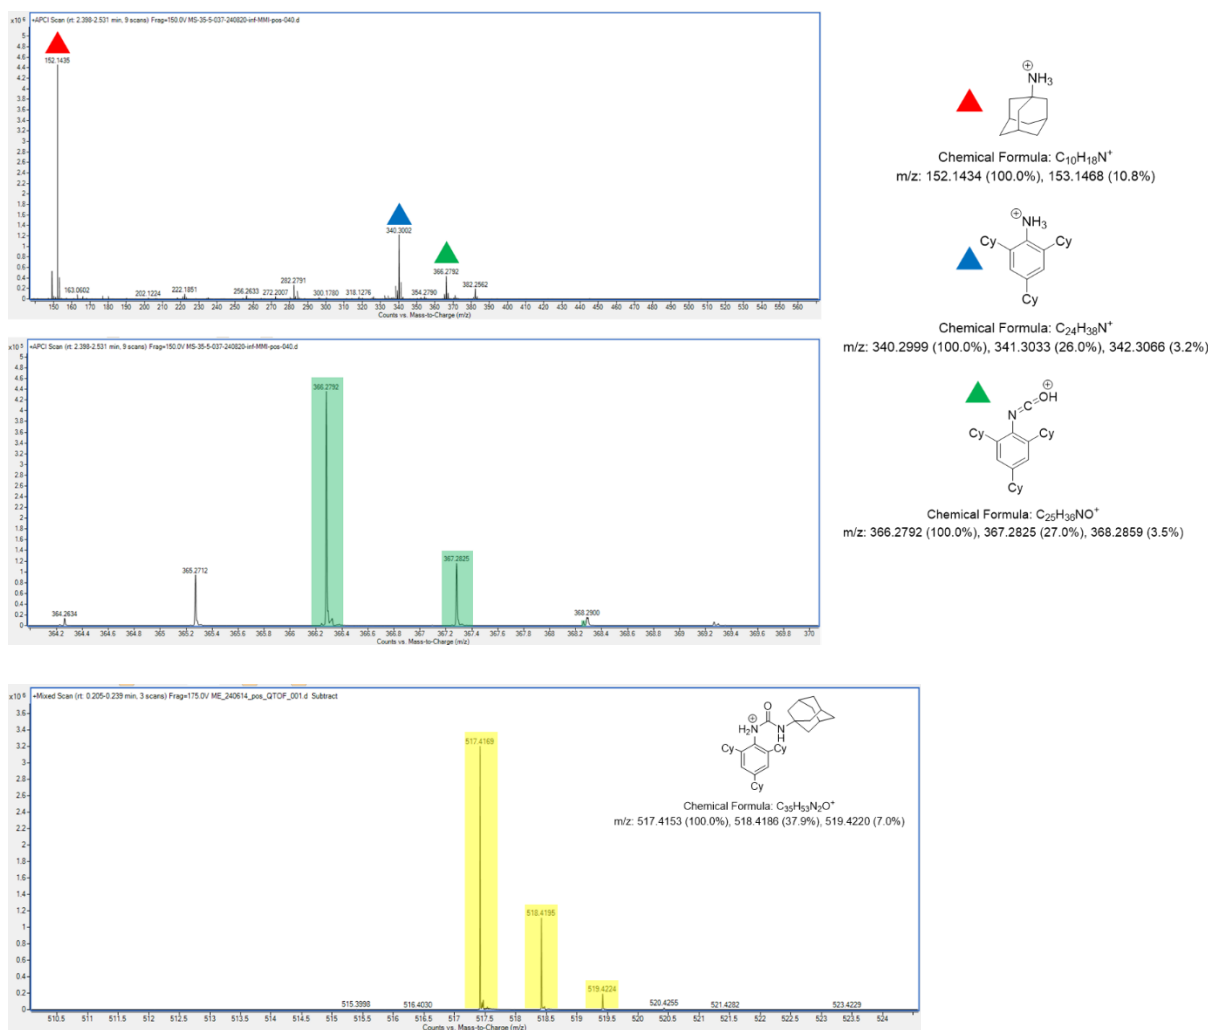

**Figure S62:** HRMS spectra of an aliquot of the supernatant of the reaction that gave **6**, showing formation of (TCHP)NCO after 24 hours heating (top), and onward formation of TCHP-NH-CO-NH-Ad after 72 hours heating (bottom).

### Preparation of $[Sn(NON^{Ad})(\mu-S)]_2$ (**7**)

**1** (100 mg, 0.18 mmol) was charged to a flame-dried Schlenk flask and hexane (~3 mL) was added. The mixture was cooled to 0 °C and 2,4,6-tricyclohexylphenyl azide (66 mg, 0.18 mmol) in hexane (~2 mL) was added in one portion. The solution was allowed to stir at room temperature for 5 minutes to give a dark red solution accompanied by vigorous gas evolution. Carbon disulphide (0.05 mL, excess) was added to the reaction mixture and stirred for 15 minutes to give a pale orange/red solution. The solvent was reduced (~1-2 mL) *in vacuo* and stored at room temperature to give colourless crystals. The supernatant was decanted and the crystals were dried *in vacuo*. Yield 63 mg, 60%.

**m.p.:** >300 °C (dec).

**$^1\text{H}$  NMR** (400 MHz,  $\text{CD}_2\text{Cl}_2$ ):  $\delta$  0.27 (s, 12H,  $\text{SiMe}_2$ ), 1.56 – 1.70 (m, 12H, Ad-*H*), 1.91 – 2.15 (m, 18H, Ad-*H*).

**$^{13}\text{C}\{^1\text{H}\}$  NMR** (101 MHz,  $\text{CD}_2\text{Cl}_2$ ):  $\delta$  5.6, 7.1 ( $\text{SiMe}_2$ ), 31.2, 36.6, 48.9, 54.7 (Ad-*C*).

**$^{119}\text{Sn}\{^1\text{H}\}$  NMR** (149 MHz,  $\text{CD}_2\text{Cl}_2$ ):  $\delta$  -122.2 (*Sn*).

**IR  $\nu/\text{cm}^{-1}$  (solid):** 731 (m), 790 (s), 820 (w), 857 (s), 958 (s), 980 (s), 1010 (m), 1096 (m), 1129 (m), 1185 (w), 1252 (s), 1305 (w), 1450 (w), 2848 (m), 2896 (s).

**E.A.:** Anal. Calcd. for  $\text{C}_{48}\text{H}_{84}\text{N}_4\text{O}_3\text{Si}_4\text{Sn}_2\text{S}\cdot(\text{CS}_2)$  (1239.24): C, 47.49; H, 6.83; N, 4.52 %. Found: C, 47.73; H, 6.66; N, 3.96 %.

\*Signals could not be detected in the  $^{29}\text{Si}\{^1\text{H}\}$  NMR spectrum after 1000 scans (5 second relaxation delay).

The supernatant from the reaction mixture was assayed by HRMS and shown to contain 2,4,6-tricyclohexylphenyl isothiocyanate.

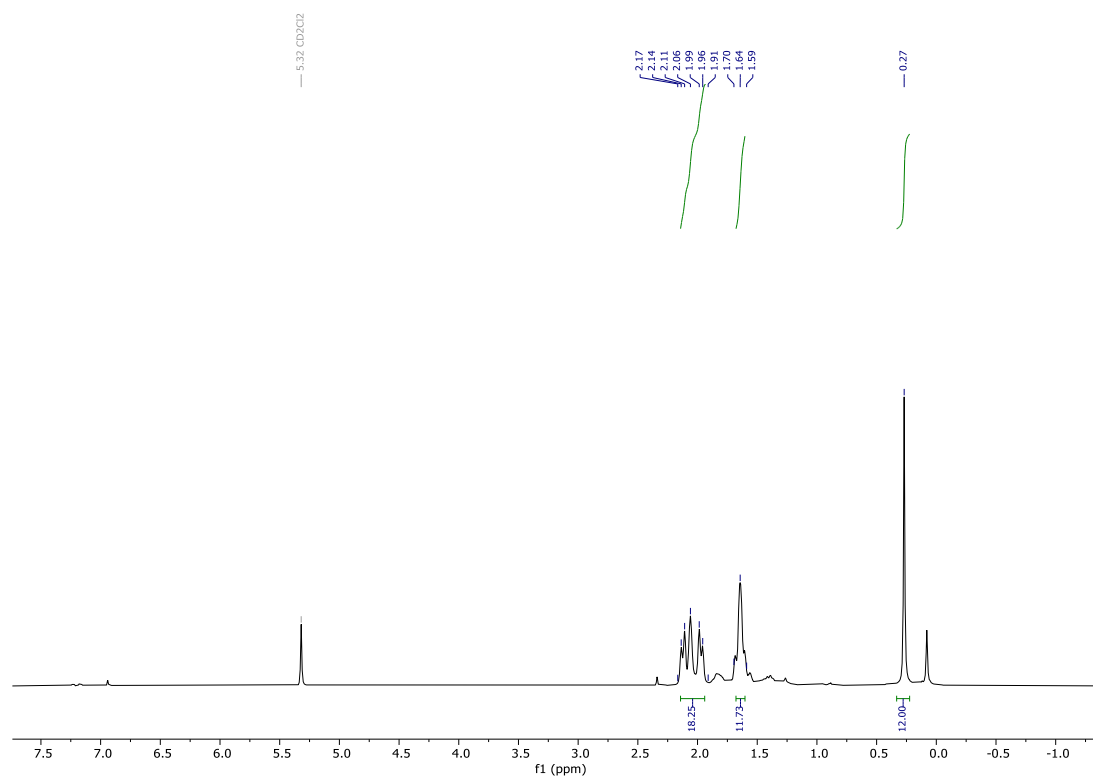

**Figure S63:**  $^1\text{H}$  NMR spectrum (400 MHz, 298 K,  $\text{CD}_2\text{Cl}_2$ ) of **7**.

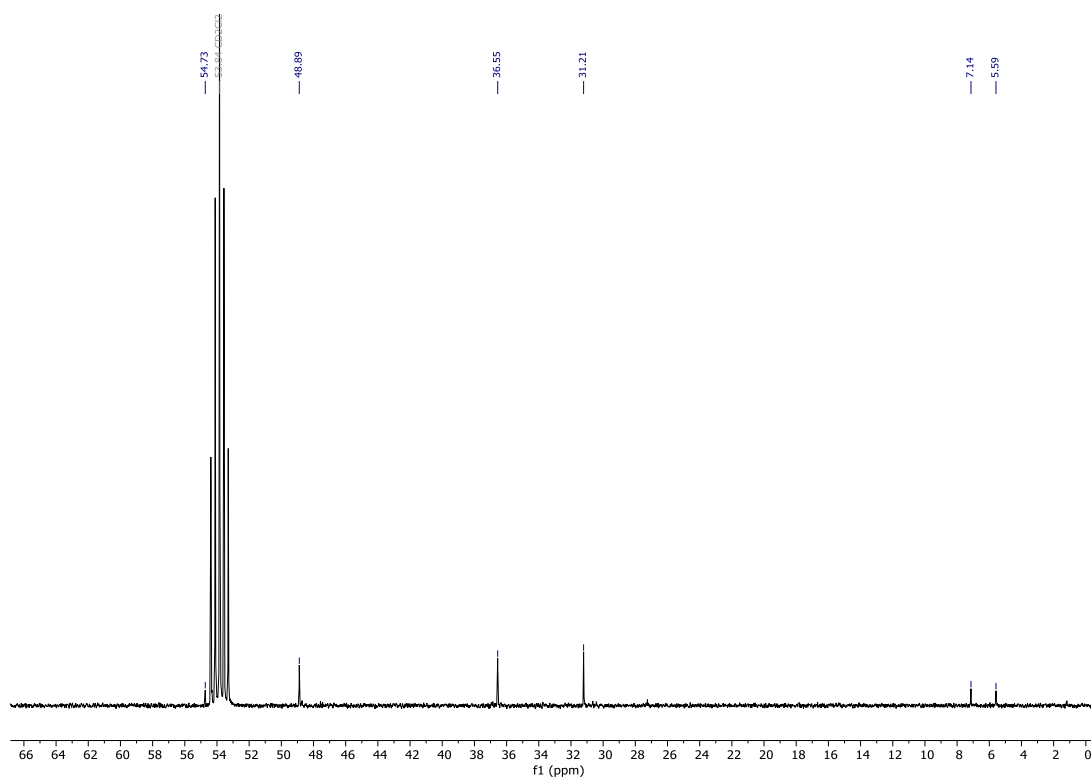

**Figure S64:**  $^{13}\text{C}\{^1\text{H}\}$  NMR spectrum (101 MHz, 298 K,  $\text{CD}_2\text{Cl}_2$ ) of **7**.

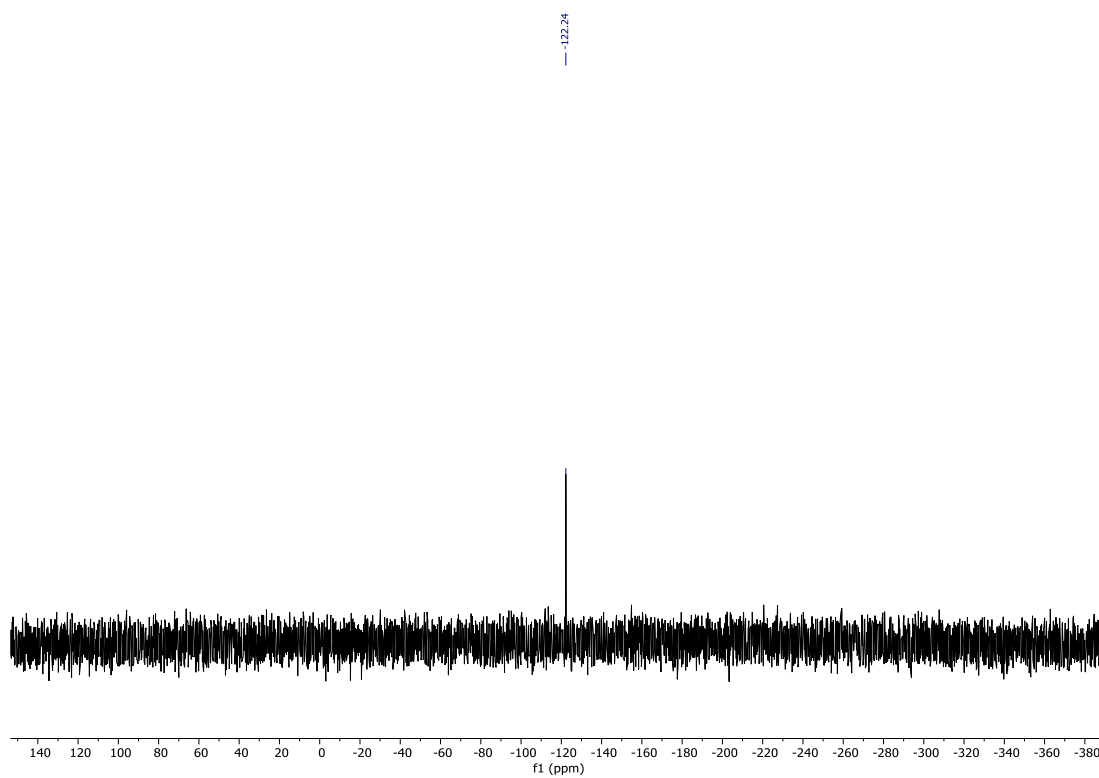

**Figure S65:**  $^{119}\text{Sn}\{^1\text{H}\}$  NMR spectrum (149 MHz, 298 K,  $\text{CD}_2\text{Cl}_2$ ) of **7**.

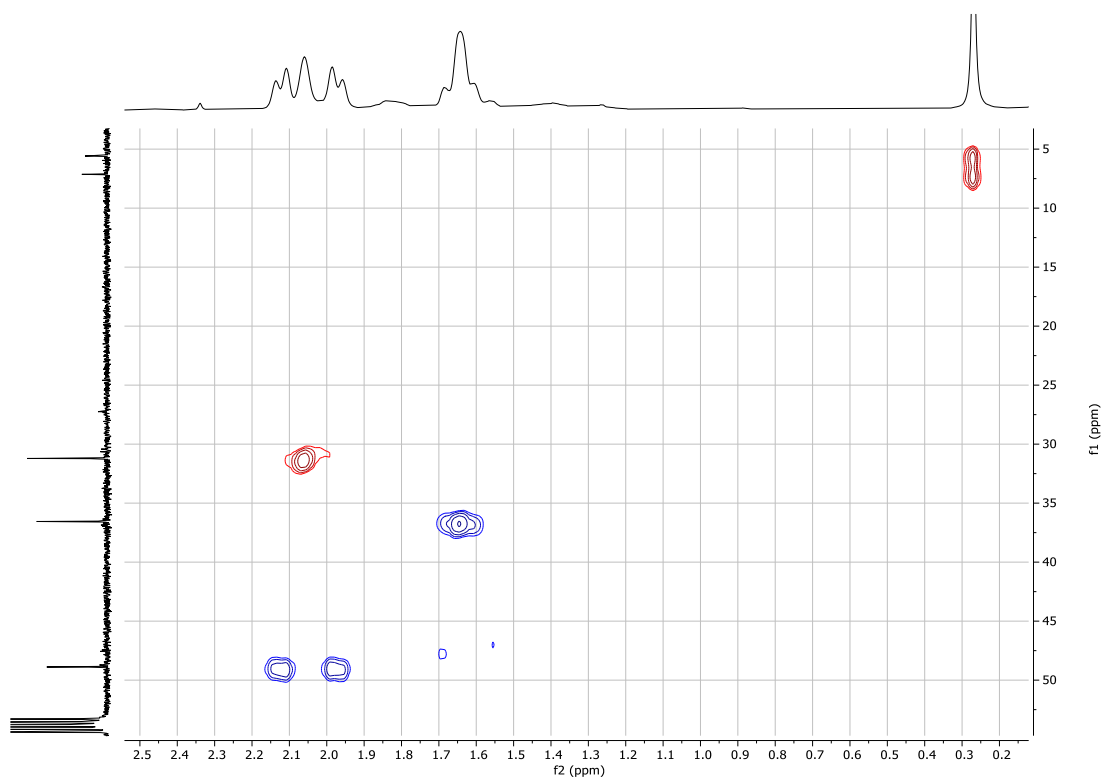

**Figure S66:** HSQC NMR spectrum (298 K, CD<sub>2</sub>Cl<sub>2</sub>) of **7**.

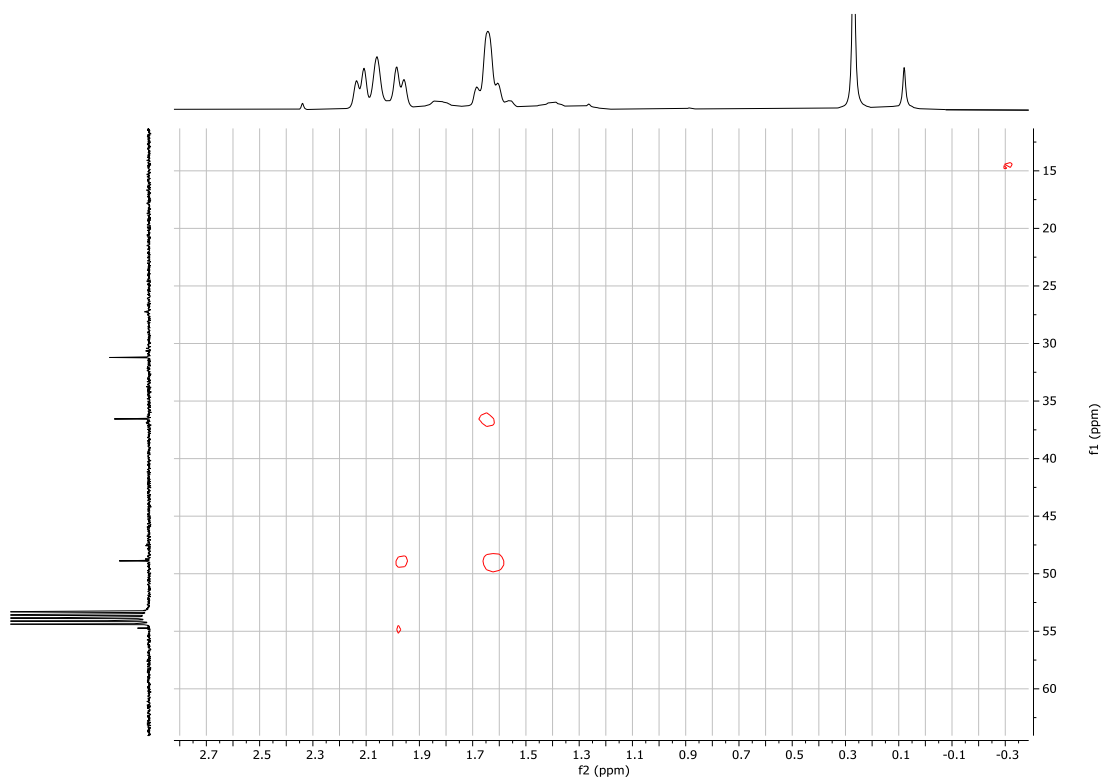

**Figure S67:** HMBC NMR spectrum (298 K, CD<sub>2</sub>Cl<sub>2</sub>) of **7**.

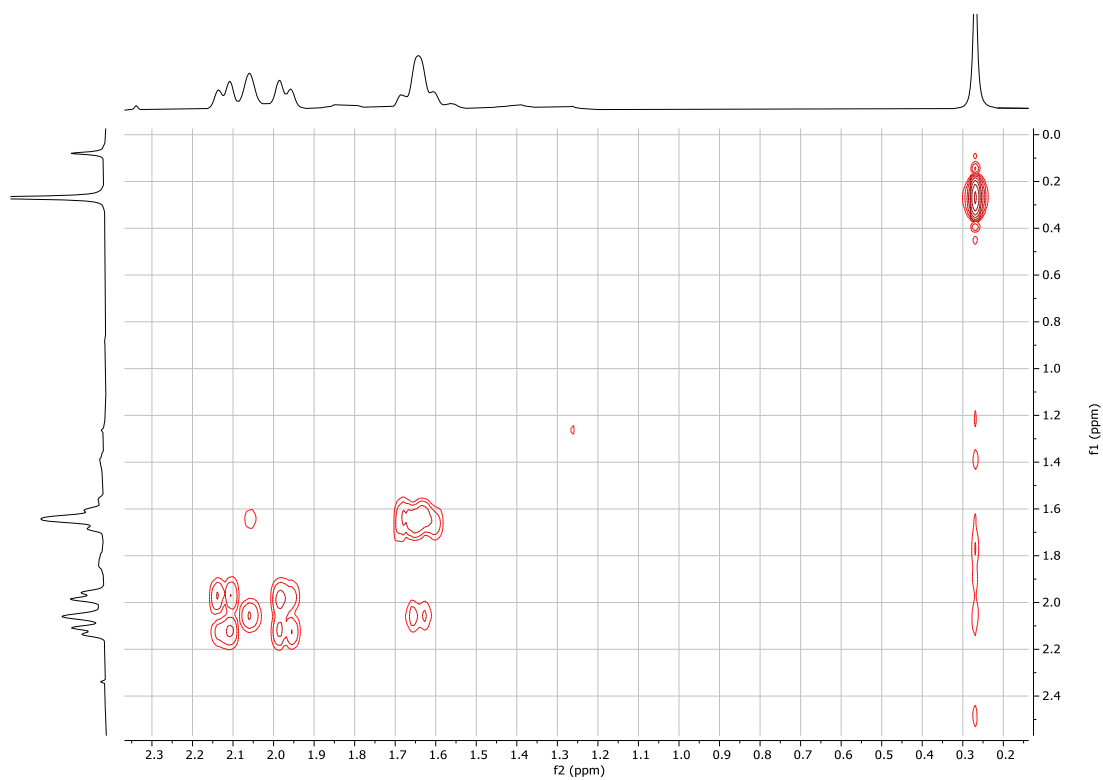

**Figure S68:**  $^1\text{H}$ - $^1\text{H}$  COSY NMR spectrum (298 K,  $\text{CD}_2\text{Cl}_2$ ) of **7**.

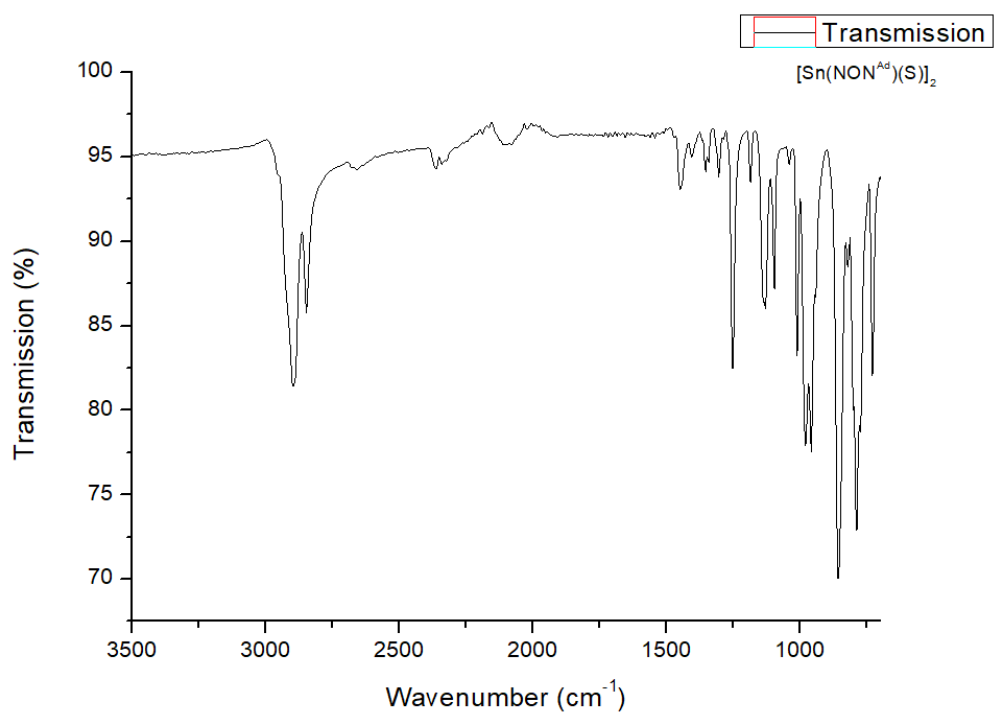

**Figure S69:** FT-IR spectrum of **7**.

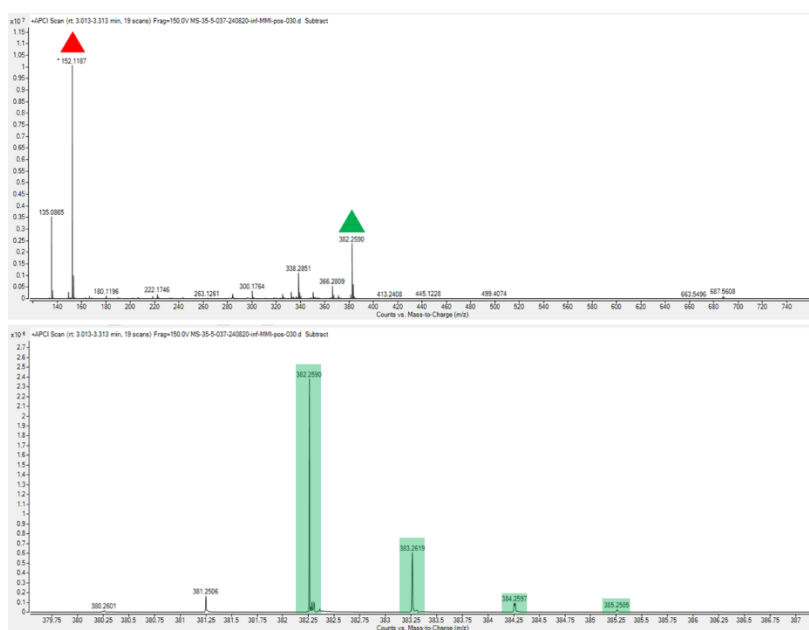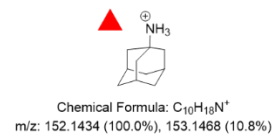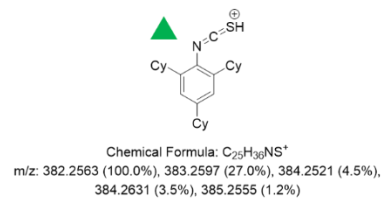

**Figure S70:** HRMS spectrum of an aliquot of the reaction mixture that gave **7**.

## 2. X-ray Crystallography

### *General Details*

Crystals suitable for X-ray structural determination were mounted in silicone oil. Crystallographic measurements were made using a Rigaku Xtalab Synergy Dualflex using a graphite monochromator with Cu K $\alpha$  (1.54180 Å) or Mo K $\alpha$  (0.71073 Å), or the MX1/MX2 beamlines of the Australian Synchrotron ( $\lambda = 0.71090$  Å). The software package Blu-Ice<sup>[S4]</sup> was used for synchrotron data acquisition, while the program XDS<sup>[S5]</sup> was employed for synchrotron data reduction. All structures were solved by direct methods and refined on F<sup>2</sup> by full matrix least squares (SHELX-18)<sup>[S6]</sup> using all unique data. Hydrogen atoms were included in calculated positions (riding model). Crystal data, details of data collections, and refinements for all structures can be found in their CIF files and are summarized in Table S1.

**Table S1:** Crystallographic Data for Compounds TCHP-MgBr, TCHP-N<sub>3</sub>, TCHP-NH-CO-NH-Ad and **1–7**.

| <i>Compound</i>                         | <b>TCHP-MgBr</b>                                  |                   | <b>TCHP-N<sub>3</sub></b>                            |                | <b>1</b>                                                                         |                 | <b>[1]<sub>2</sub></b>                                                                        |                   |
|-----------------------------------------|---------------------------------------------------|-------------------|------------------------------------------------------|----------------|----------------------------------------------------------------------------------|-----------------|-----------------------------------------------------------------------------------------------|-------------------|
| <i>Empirical formula</i>                | C <sub>24</sub> H <sub>35</sub> N <sub>3</sub>    |                   | C <sub>35.5</sub> H <sub>55</sub> BrMgO <sub>2</sub> |                | C <sub>24</sub> H <sub>42</sub> N <sub>2</sub> O <sub>2</sub> Si <sub>2</sub> Sn |                 | C <sub>48</sub> H <sub>84</sub> N <sub>4</sub> O <sub>2</sub> Si <sub>4</sub> Sn <sub>2</sub> |                   |
| <i>Formula weight</i>                   | 365.55                                            |                   | 618.01                                               |                | 549.46                                                                           |                 | 1098.93                                                                                       |                   |
| <i>Temperature</i>                      | 123(2) K                                          |                   | 100(2) K                                             |                | 123(2) K                                                                         |                 | 123(2) K                                                                                      |                   |
| <i>Crystal system</i>                   | Monoclinic                                        |                   | Triclinic                                            |                | Monoclinic                                                                       |                 | Monoclinic                                                                                    |                   |
| <i>Space group</i>                      | P2 <sub>1</sub> /c                                |                   | P-1                                                  |                | C <sub>2</sub> /c                                                                |                 | P2 <sub>1</sub> /c                                                                            |                   |
| <i>Unit cell dimensions</i>             | a = 14.7377(2) Å                                  | α = 90°           | a = 11.650(2) Å                                      | α = 110.10(3)° | a = 23.4081(3) Å                                                                 | α = 90°         | a = 13.88140(10) Å                                                                            | α = 90°           |
|                                         | b = 12.0636(2) Å                                  | β = 101.9570(10)° | b = 16.270(3) Å                                      | β = 90.20(3)°  | b = 9.85020(10) Å                                                                | β = 117.035(2)° | b = 15.80820(10) Å                                                                            | β = 108.9800(10)° |
|                                         | c = 12.0363(2) Å                                  | γ = 90°           | c = 20.410(4) Å                                      | γ = 110.90(3)° | c = 24.8391(4) Å                                                                 | γ = 90°         | c = 12.12920(10) Å                                                                            | γ = 90°           |
| <i>Volume</i>                           | 2093.50(6) Å <sup>3</sup>                         |                   | 3358.7(15) Å <sup>3</sup>                            |                | 5101.44(14) Å <sup>3</sup>                                                       |                 | 2516.92(3) Å <sup>3</sup>                                                                     |                   |
| <i>Z</i>                                | 4                                                 |                   | 4                                                    |                | 8                                                                                |                 | 2                                                                                             |                   |
| <i>Density (calculated)</i>             | 1.160 Mg/m <sup>3</sup>                           |                   | 1.222 Mg/m <sup>3</sup>                              |                | 1.431 Mg/m <sup>3</sup>                                                          |                 | 1.450 Mg/m <sup>3</sup>                                                                       |                   |
| <i>Absorption coefficient</i>           | 0.516 mm <sup>-1</sup>                            |                   | 1.271 mm <sup>-1</sup>                               |                | 8.997 mm <sup>-1</sup>                                                           |                 | 9.118 mm <sup>-1</sup>                                                                        |                   |
| <i>F(000)</i>                           | 800                                               |                   | 1324                                                 |                | 2288                                                                             |                 | 1144                                                                                          |                   |
| <i>Crystal size</i>                     | 0.530 x 0.430 x 0.250 mm <sup>3</sup>             |                   | 0.150 x 0.130 x 0.080 mm <sup>3</sup>                |                | 0.400 x 0.300 x 0.300 mm <sup>3</sup>                                            |                 | 0.230 x 0.100 x 0.080 mm <sup>3</sup>                                                         |                   |
| <i>Theta range for data collection</i>  | 4.780 to 79.941°                                  |                   | 1.074 to 26.372°                                     |                | 3.996 to 79.851°                                                                 |                 | 4.378 to 80.466°                                                                              |                   |
| <i>Index ranges</i>                     | -18<=h<=14, -14<=k<=15, -15<=l<=15                |                   | -14<=h<=14, -20<=k<=20, -25<=l<=25                   |                | -28<=h<=29, -12<=k<=12, -30<=l<=31                                               |                 | -17<=h<=16, -19<=k<=20, -15<=l<=15                                                            |                   |
| <i>Reflections collected</i>            | 16061                                             |                   | 81308                                                |                | 31925                                                                            |                 | 61167                                                                                         |                   |
| <i>Independent reflections</i>          | 4482 [R(int) = 0.0294]                            |                   | 13370 [R(int) = 0.0811]                              |                | 5476 [R(int) = 0.0360]                                                           |                 | 5471 [R(int) = 0.0611]                                                                        |                   |
| <i>Completeness to theta = 67.684°</i>  | 100.00%                                           |                   | 99.50%                                               |                | 100.00%                                                                          |                 | 100.00%                                                                                       |                   |
| <i>Absorption correction</i>            | Gaussian                                          |                   | Semi-empirical from equivalents                      |                | Semi-empirical from equivalents                                                  |                 | Sphere                                                                                        |                   |
| <i>Max. and min. transmission</i>       | 1.000 and 0.238                                   |                   | Value not reported by XDS                            |                | 1.00000 and 0.50485                                                              |                 | 0.09790 and 0.01535                                                                           |                   |
| <i>Data / restraints / parameters</i>   | 4482 / 27 / 244                                   |                   | 13370 / 2059 / 1180                                  |                | 5476 / 2 / 285                                                                   |                 | 5471 / 0 / 275                                                                                |                   |
| <i>Goodness-of-fit on F<sup>2</sup></i> | 1.062                                             |                   | 1.053                                                |                | 1.044                                                                            |                 | 1.065                                                                                         |                   |
| <i>Final R indices [I&gt;2sigma(I)]</i> | R <sub>1</sub> = 0.0401, wR <sub>2</sub> = 0.1050 |                   | R <sub>1</sub> = 0.0682, wR <sub>2</sub> = 0.1960    |                | R <sub>1</sub> = 0.0254, wR <sub>2</sub> = 0.0675                                |                 | R <sub>1</sub> = 0.0503, wR <sub>2</sub> = 0.1194                                             |                   |
| <i>R indices (all data)</i>             | R <sub>1</sub> = 0.0440, wR <sub>2</sub> = 0.1081 |                   | R <sub>1</sub> = 0.1201, wR <sub>2</sub> = 0.2352    |                | R <sub>1</sub> = 0.0258, wR <sub>2</sub> = 0.0679                                |                 | R <sub>1</sub> = 0.0520, wR <sub>2</sub> = 0.1220                                             |                   |
| <i>Largest diff. peak and hole</i>      | 0.276 and -0.194 e.Å <sup>-3</sup>                |                   | 0.896 and -0.747 e.Å <sup>-3</sup>                   |                | 0.760 and -0.765 e.Å <sup>-3</sup>                                               |                 | 2.035 and -0.368 e.Å <sup>-3</sup>                                                            |                   |
| <i>CCDC Number</i>                      | 2375861                                           |                   | 2375864                                              |                | 2375857                                                                          |                 | 2375868                                                                                       |                   |



**Table S1 (contd.):** Crystallographic Data for Compounds TCHP-MgBr, TCHP-N<sub>3</sub>, TCHP-NH-CO-NH-Ad and 1–7.

| Compound                                | 1 + [1] <sub>2</sub>                                                |                 | 2                                                                   |                   | 3                                                                   |                | 3·THF                                                                              |         |
|-----------------------------------------|---------------------------------------------------------------------|-----------------|---------------------------------------------------------------------|-------------------|---------------------------------------------------------------------|----------------|------------------------------------------------------------------------------------|---------|
| <i>Empirical formula</i>                | C <sub>24</sub> H <sub>42</sub> N <sub>2</sub> O Si <sub>2</sub> Sn |                 | C <sub>42</sub> H <sub>64</sub> N <sub>6</sub> O Si <sub>2</sub> Sn |                   | C <sub>60</sub> H <sub>89</sub> N <sub>3</sub> O Si <sub>2</sub> Sn |                | C <sub>58</sub> H <sub>97</sub> N <sub>3</sub> O <sub>3.5</sub> Si <sub>2</sub> Sn |         |
| <i>Formula weight</i>                   | 549.46                                                              |                 | 843.86                                                              |                   | 1043.21                                                             |                | 1067.25                                                                            |         |
| <i>Temperature</i>                      | 123(2) K                                                            |                 | 123(2) K                                                            |                   | 123(2) K                                                            |                | 123(2) K                                                                           |         |
| <i>Crystal system</i>                   | Triclinic                                                           |                 | Triclinic                                                           |                   | Monoclinic                                                          |                | Orthorhombic                                                                       |         |
| <i>Space group</i>                      | <i>P</i> -1                                                         |                 | <i>P</i> -1                                                         |                   | <i>P</i> <sub>2</sub> /n                                            |                | <i>Pbcn</i>                                                                        |         |
| <i>Unit cell dimensions</i>             | a = 12.0306(2) Å                                                    | α = 101.088(2)° | a = 10.0691(2) Å                                                    | α = 100.6960(10)° | a = 12.7009(2) Å                                                    | α = 90°        | a = 25.1156(4) Å                                                                   | α = 90° |
|                                         | b = 12.4770(2) Å                                                    | β = 90.514(2)°  | b = 12.5740(2) Å                                                    | β = 91.930(2)°    | b = 21.8593(4) Å                                                    | β = 96.796(2)° | b = 18.2987(2) Å                                                                   | β = 90° |
|                                         | c = 18.1078(4) Å                                                    | γ = 107.761(2)° | c = 18.6212(3) Å                                                    | γ = 93.539(2)°    | c = 19.9906(4) Å                                                    | γ = 90°        | c = 24.1950(3) Å                                                                   | γ = 90° |
| <i>Volume</i>                           | 2533.55(9) Å <sup>3</sup>                                           |                 | 2309.78(7) Å <sup>3</sup>                                           |                   | 5511.05(17) Å <sup>3</sup>                                          |                | 11119.6(3) Å <sup>3</sup>                                                          |         |
| <i>Z</i>                                | 4                                                                   |                 | 2                                                                   |                   | 4                                                                   |                | 8                                                                                  |         |
| <i>Density (calculated)</i>             | 1.441 Mg/m <sup>3</sup>                                             |                 | 1.213 Mg/m <sup>3</sup>                                             |                   | 1.257 Mg/m <sup>3</sup>                                             |                | 1.275 Mg/m <sup>3</sup>                                                            |         |
| <i>Absorption coefficient</i>           | 9.058 mm <sup>-1</sup>                                              |                 | 5.169 mm <sup>-1</sup>                                              |                   | 0.549 mm <sup>-1</sup>                                              |                | 4.417 mm <sup>-1</sup>                                                             |         |
| <i>F(000)</i>                           | 1144                                                                |                 | 888                                                                 |                   | 2224                                                                |                | 4576                                                                               |         |
| <i>Crystal size</i>                     | 0.314 x 0.124 x 0.081 mm <sup>3</sup>                               |                 | 0.400 x 0.300 x 0.300 mm <sup>3</sup>                               |                   | 0.400 x 0.300 x 0.300 mm <sup>3</sup>                               |                | 0.190 x 0.170 x 0.120 mm <sup>3</sup>                                              |         |
| <i>Theta range for data collection</i>  | 3.868 to 80.021°                                                    |                 | 3.586 to 80.313°                                                    |                   | 3.362 to 32.333°                                                    |                | 3.503 to 80.617°                                                                   |         |
| <i>Index ranges</i>                     | -10<=h<=15, -15<=k<=15, -23<=l<=23                                  |                 | -12<=h<=9, -16<=k<=16, -23<=l<=23                                   |                   | -17<=h<=18, -30<=k<=30, -25<=l<=29                                  |                | -29<=h<=31, -23<=k<=20, -30<=l<=29                                                 |         |
| <i>Reflections collected</i>            | 33647                                                               |                 | 49282                                                               |                   | 76316                                                               |                | 61675                                                                              |         |
| <i>Independent reflections</i>          | 10624 [R(int) = 0.0370]                                             |                 | 9879 [R(int) = 0.0610]                                              |                   | 16800 [R(int) = 0.0666]                                             |                | 11906 [R(int) = 0.0684]                                                            |         |
| <i>Completeness to theta = 67.684°</i>  | 99.20%                                                              |                 | 100.00%                                                             |                   | 99.70%                                                              |                | 99.80%                                                                             |         |
| <i>Absorption correction</i>            | Semi-empirical from equivalents                                     |                 | Semi-empirical from equivalents                                     |                   | Semi-empirical from equivalents                                     |                | Semi-empirical from equivalents                                                    |         |
| <i>Max. and min. transmission</i>       | 1.00000 and 0.29927                                                 |                 | 1.00000 and 0.50616                                                 |                   | 1.00000 and 0.42137                                                 |                | 1.00000 and 0.69084                                                                |         |
| <i>Data / restraints / parameters</i>   | 10624 / 0 / 549                                                     |                 | 9879 / 424 / 570                                                    |                   | 16800 / 0 / 608                                                     |                | 11906 / 273 / 681                                                                  |         |
| <i>Goodness-of-fit on F<sup>2</sup></i> | 1.053                                                               |                 | 1.069                                                               |                   | 1.035                                                               |                | 1.049                                                                              |         |
| <i>Final R indices [I&gt;2sigma(I)]</i> | R <sub>1</sub> = 0.0524, wR <sub>2</sub> = 0.1379                   |                 | R <sub>1</sub> = 0.0362, wR <sub>2</sub> = 0.0982                   |                   | R <sub>1</sub> = 0.0393, wR <sub>2</sub> = 0.0827                   |                | R <sub>1</sub> = 0.0533, wR <sub>2</sub> = 0.1398                                  |         |
| <i>R indices (all data)</i>             | R <sub>1</sub> = 0.0540, wR <sub>2</sub> = 0.1389                   |                 | R <sub>1</sub> = 0.0375, wR <sub>2</sub> = 0.1009                   |                   | R <sub>1</sub> = 0.0643, wR <sub>2</sub> = 0.0905                   |                | R <sub>1</sub> = 0.0667, wR <sub>2</sub> = 0.1523                                  |         |
| <i>Largest diff. peak and hole</i>      | 3.476 and -1.398 e.Å <sup>-3</sup>                                  |                 | 1.089 and -1.645 e.Å <sup>-3</sup>                                  |                   | 0.914 and -0.553 e.Å <sup>-3</sup>                                  |                | 0.977 and -1.927 e.Å <sup>-3</sup>                                                 |         |
| <i>CCDC Number</i>                      | 2375866                                                             |                 | 2375869                                                             |                   | 2375863                                                             |                | 2375858                                                                            |         |

**Table S1 (contd.):** Crystallographic Data for Compounds TCHP-MgBr, TCHP-N<sub>3</sub>, TCHP-NH-CO-NH-Ad and 1–7.

| Compound                                | 4                                                                   |                | 5                                                                                |         | 6                                                                                              |                | 7                                                                                                             |                |
|-----------------------------------------|---------------------------------------------------------------------|----------------|----------------------------------------------------------------------------------|---------|------------------------------------------------------------------------------------------------|----------------|---------------------------------------------------------------------------------------------------------------|----------------|
| <i>Empirical formula</i>                | C <sub>48</sub> H <sub>77</sub> N <sub>3</sub> O Si <sub>2</sub> Sn |                | C <sub>49</sub> H <sub>77</sub> N <sub>3</sub> O <sub>3</sub> Si <sub>2</sub> Sn |         | C <sub>66</sub> H <sub>102</sub> N <sub>4</sub> O <sub>4</sub> Si <sub>4</sub> Sn <sub>2</sub> |                | C <sub>62</sub> H <sub>100</sub> N <sub>4</sub> O <sub>2</sub> S <sub>2</sub> Si <sub>4</sub> Sn <sub>2</sub> |                |
| <i>Formula weight</i>                   | 886.99                                                              |                | 931                                                                              |         | 1365.25                                                                                        |                | 1347.31                                                                                                       |                |
| <i>Temperature</i>                      | 123(2) K                                                            |                | 100(2) K                                                                         |         | 150(2) K                                                                                       |                | 100(2) K                                                                                                      |                |
| <i>Crystal system</i>                   | Triclinic                                                           |                | Orthorhombic                                                                     |         | Triclinic                                                                                      |                | Monoclinic                                                                                                    |                |
| <i>Space group</i>                      | P-1                                                                 |                | I222                                                                             |         | P-1                                                                                            |                | P2 <sub>1</sub> /c                                                                                            |                |
| <i>Unit cell dimensions</i>             | a = 11.1935(2) Å                                                    | α = 76.517(2)° | a = 15.850(3) Å                                                                  | α = 90° | a = 12.0275(3) Å                                                                               | α = 76.540(2)° | a = 15.660(3) Å                                                                                               | α = 90°        |
|                                         | b = 12.7879(3) Å                                                    | β = 79.309(2)° | b = 25.750(5) Å                                                                  | β = 90° | b = 12.2587(2) Å                                                                               | β = 65.263(2)° | b = 17.710(4) Å                                                                                               | β = 107.76(3)° |
|                                         | c = 16.5797(3) Å                                                    | γ = 82.645(2)° | c = 28.570(6) Å                                                                  | γ = 90° | c = 12.5878(3) Å                                                                               | γ = 87.402(2)° | c = 12.130(2) Å                                                                                               | γ = 90°        |
| <i>Volume</i>                           | 2258.83(8) Å <sup>3</sup>                                           |                | 11660(4) Å <sup>3</sup>                                                          |         | 1636.51(7) Å <sup>3</sup>                                                                      |                | 3203.7(12) Å <sup>3</sup>                                                                                     |                |
| <i>Z</i>                                | 2                                                                   |                | 8                                                                                |         | 1                                                                                              |                | 2                                                                                                             |                |
| <i>Density (calculated)</i>             | 1.304 Mg/m <sup>3</sup>                                             |                | 1.061 Mg/m <sup>3</sup>                                                          |         | 1.385 Mg/m <sup>3</sup>                                                                        |                | 1.397 Mg/m <sup>3</sup>                                                                                       |                |
| <i>Absorption coefficient</i>           | 5.288 mm <sup>-1</sup>                                              |                | 0.514 mm <sup>-1</sup>                                                           |         | 7.149 mm <sup>-1</sup>                                                                         |                | 0.964 mm <sup>-1</sup>                                                                                        |                |
| <i>F(000)</i>                           | 944                                                                 |                | 3952                                                                             |         | 714                                                                                            |                | 1408                                                                                                          |                |
| <i>Crystal size</i>                     | 0.180 x 0.070 x 0.020 mm <sup>3</sup>                               |                | 0.080 x 0.050 x 0.020 mm <sup>3</sup>                                            |         | 0.310 x 0.130 x 0.100 mm <sup>3</sup>                                                          |                | 0.100 x 0.080 x 0.040 mm <sup>3</sup>                                                                         |                |
| <i>Theta range for data collection</i>  | 3.568 to 80.621°                                                    |                | 1.065 to 26.372°                                                                 |         | 3.714 to 80.719°                                                                               |                | 1.365 to 26.371°                                                                                              |                |
| <i>Index ranges</i>                     | -14<=h<=14, -15<=k<=12, -21<=l<=20                                  |                | -19<=h<=19, -32<=k<=32, -35<=l<=35                                               |         | -15<=h<=13, -15<=k<=15, -16<=l<=12                                                             |                | -19<=h<=19, -22<=k<=20, -14<=l<=15                                                                            |                |
| <i>Reflections collected</i>            | 46149                                                               |                | 150791                                                                           |         | 34469                                                                                          |                | 75988                                                                                                         |                |
| <i>Independent reflections</i>          | 9606 [R(int) = 0.0653]                                              |                | 11929 [R(int) = 0.1001]                                                          |         | 6990 [R(int) = 0.0897]                                                                         |                | 6512 [R(int) = 0.0419]                                                                                        |                |
| <i>Completeness to theta = 67.684°</i>  | 99.80%                                                              |                | 100.00%                                                                          |         | 99.90%                                                                                         |                | 99.90%                                                                                                        |                |
| <i>Absorption correction</i>            | Gaussian                                                            |                | Semi-empirical from equivalents                                                  |         | Gaussian                                                                                       |                | Semi-empirical from equivalents                                                                               |                |
| <i>Max. and min. transmission</i>       | 1.000 and 0.614                                                     |                | Value not reported by XDS                                                        |         | 1.000 and 0.173                                                                                |                | Value not reported by XDS                                                                                     |                |
| <i>Data / restraints / parameters</i>   | 9606 / 0 / 503                                                      |                | 11929 / 0 / 527                                                                  |         | 6990 / 0 / 365                                                                                 |                | 6512 / 0 / 348                                                                                                |                |
| <i>Goodness-of-fit on F<sup>2</sup></i> | 1.04                                                                |                | 1.045                                                                            |         | 1.024                                                                                          |                | 1.1                                                                                                           |                |
| <i>Final R indices [I&gt;2σ(I)]</i>     | R <sub>1</sub> = 0.0508, wR <sub>2</sub> = 0.1304                   |                | R <sub>1</sub> = 0.0787, wR <sub>2</sub> = 0.2127                                |         | R <sub>1</sub> = 0.0458, wR <sub>2</sub> = 0.1176                                              |                | R <sub>1</sub> = 0.0278, wR <sub>2</sub> = 0.0771                                                             |                |
| <i>R indices (all data)</i>             | R <sub>1</sub> = 0.0566, wR <sub>2</sub> = 0.1339                   |                | R <sub>1</sub> = 0.0860, wR <sub>2</sub> = 0.2284                                |         | R <sub>1</sub> = 0.0470, wR <sub>2</sub> = 0.1192                                              |                | R <sub>1</sub> = 0.0296, wR <sub>2</sub> = 0.0787                                                             |                |
| <i>Largest diff. peak and hole</i>      | 2.159 and -1.465 e.Å <sup>-3</sup>                                  |                | 2.359 and -0.540 e.Å <sup>-3</sup>                                               |         | 2.591 and -1.750 e.Å <sup>-3</sup>                                                             |                | 0.980 and -1.131 e.Å <sup>-3</sup>                                                                            |                |
| <i>CCDC Number</i>                      | 2375867                                                             |                | 2375860                                                                          |         | 2375865                                                                                        |                | 2375862                                                                                                       |                |

**Table S1 (contd.):** Crystallographic Data for Compounds TCHP-MgBr, TCHP-N<sub>3</sub>, TCHP-NH-CO-NH-Ad and 1–7.

| <i>Compound</i>                         | <b>TCHP-NH-CO-NH-Ad</b>                           |                  |
|-----------------------------------------|---------------------------------------------------|------------------|
| <i>Empirical formula</i>                | C <sub>35</sub> H <sub>52</sub> N <sub>2</sub> O  |                  |
| <i>Formula weight</i>                   | 516.78                                            |                  |
| <i>Temperature</i>                      | 123(2) K                                          |                  |
| <i>Crystal system</i>                   | Monoclinic                                        |                  |
| <i>Space group</i>                      | P2 <sub>1</sub> /n                                |                  |
| <i>Unit cell dimensions</i>             | a = 13.3416(2) Å                                  | α = 90°          |
|                                         | b = 11.50200(10) Å                                | β = 95.9520(10)° |
|                                         | c = 20.3224(2) Å                                  | γ = 90°          |
| <i>Volume</i>                           | 3101.76(6) Å <sup>3</sup>                         |                  |
| <i>Z</i>                                | 4                                                 |                  |
| <i>Density (calculated)</i>             | 1.107 Mg/m <sup>3</sup>                           |                  |
| <i>Absorption coefficient</i>           | 0.494 mm <sup>-1</sup>                            |                  |
| <i>F(000)</i>                           | 1136                                              |                  |
| <i>Crystal size</i>                     | 0.300 x 0.200 x 0.100 mm <sup>3</sup>             |                  |
| <i>Theta range for data collection</i>  | 3.790 to 80.197°.                                 |                  |
| <i>Index ranges</i>                     | -16 ≤ h ≤ 17, -14 ≤ k ≤ 9, -24 ≤ l ≤ 25           |                  |
| <i>Reflections collected</i>            | 33658                                             |                  |
| <i>Independent reflections</i>          | 6652 [R(int) = 0.0534]                            |                  |
| <i>Completeness to theta = 67.684°</i>  | 100.00%                                           |                  |
| <i>Absorption correction</i>            | Semi-empirical from equivalents                   |                  |
| <i>Max. and min. transmission</i>       | 1.00000 and 0.72277                               |                  |
| <i>Data / restraints / parameters</i>   | 6652 / 0 / 351                                    |                  |
| <i>Goodness-of-fit on F<sup>2</sup></i> | 1.032                                             |                  |
| <i>Final R indices [I &gt; 2σ(I)]</i>   | R <sub>1</sub> = 0.0619, wR <sub>2</sub> = 0.1750 |                  |
| <i>R indices (all data)</i>             | R <sub>1</sub> = 0.0694, wR <sub>2</sub> = 0.1833 |                  |
| <i>Largest diff. peak and hole</i>      | 0.933 and -0.405 e.Å <sup>-3</sup>                |                  |
| <i>CCDC Number</i>                      | 2375859                                           |                  |

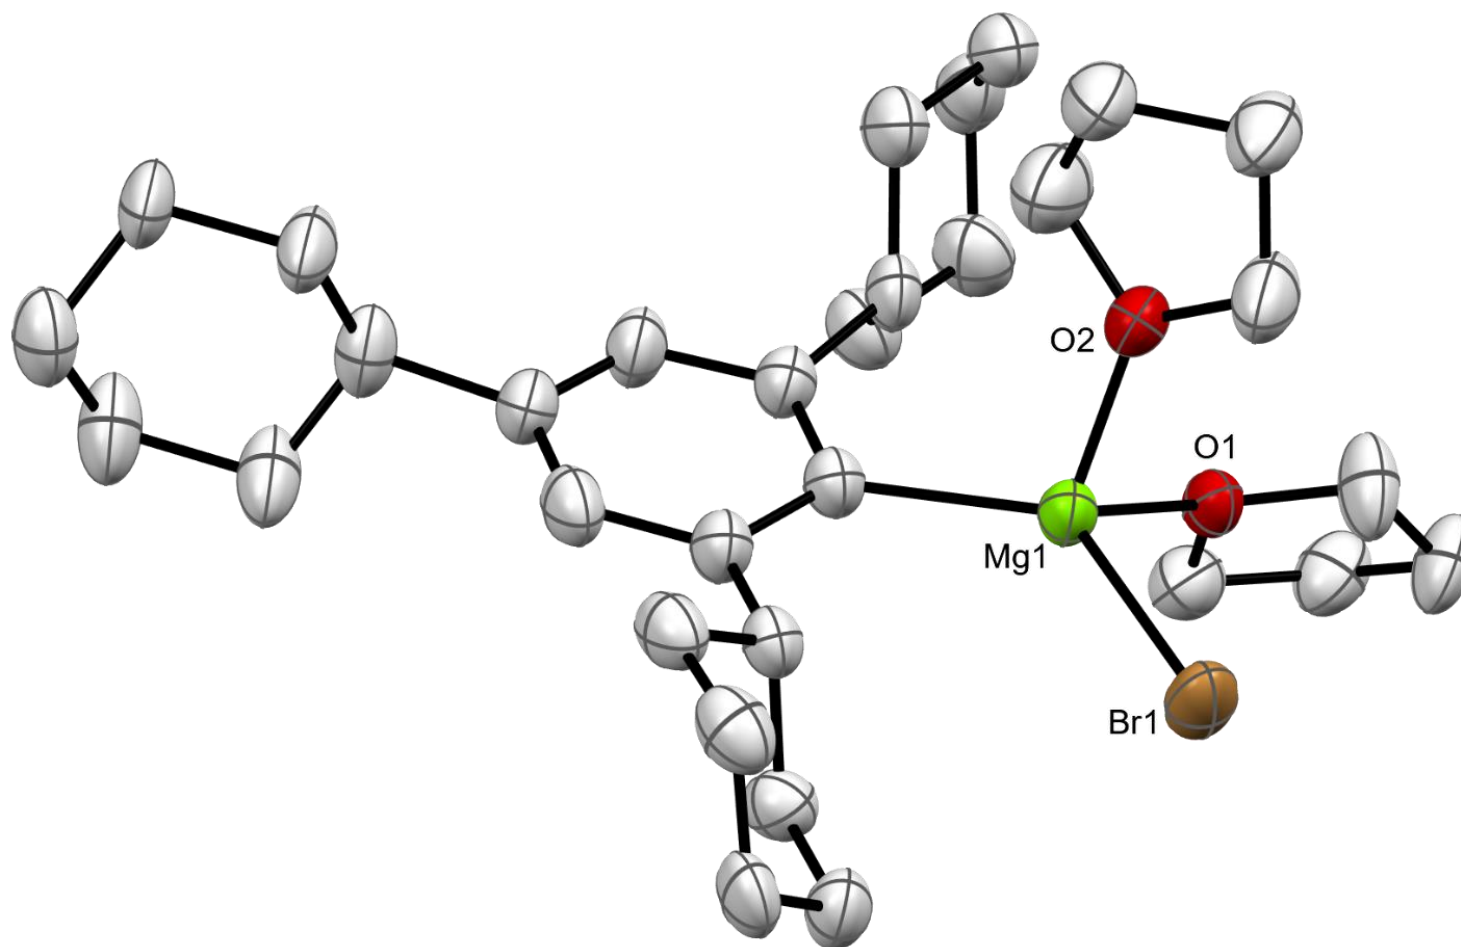

**Figure S71:** Molecular structure of 2,4,6-tricyclohexylphenyl magnesium bromide (TCHP-MgBr). Thermal ellipsoids shown at 20% probability; hydrogen atoms omitted.

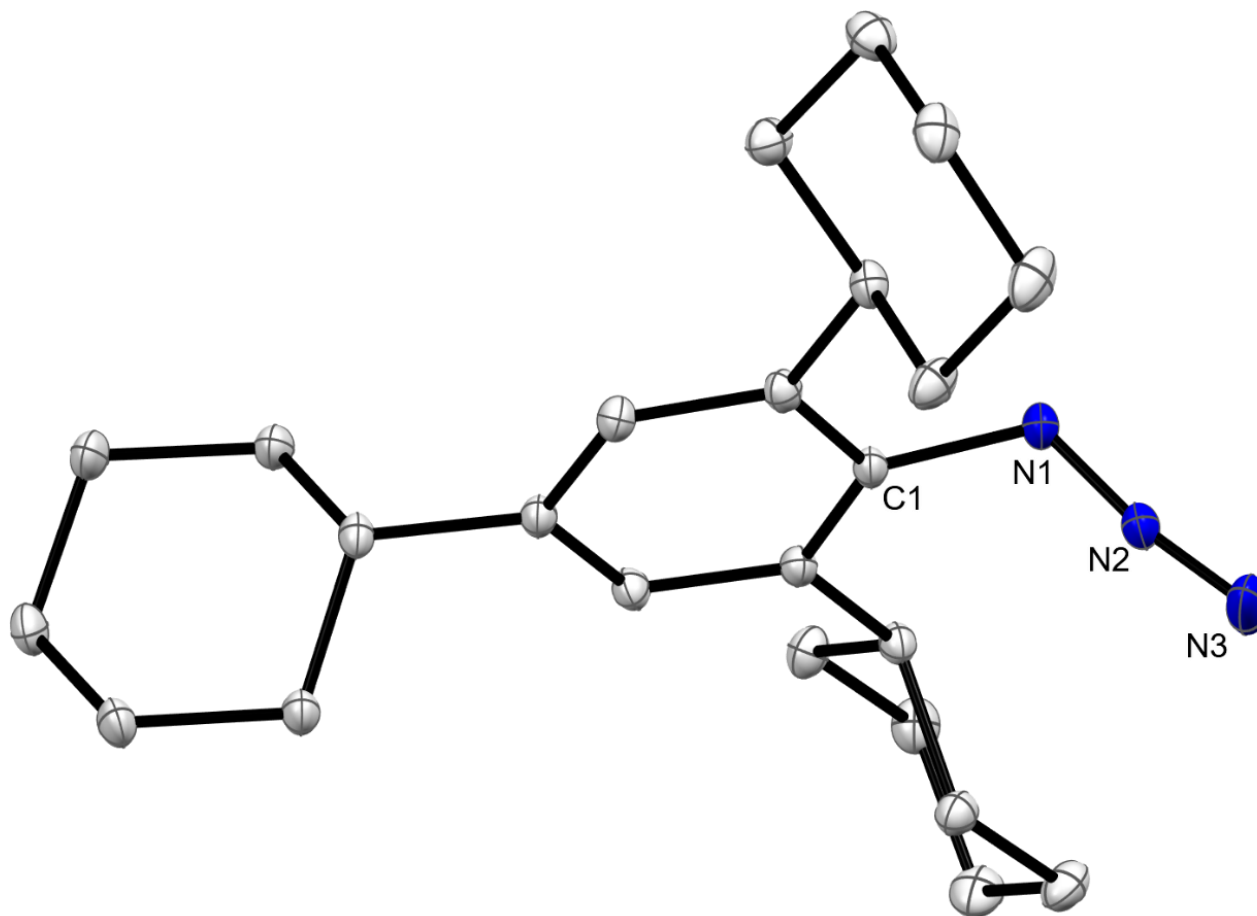

**Figure S72:** Molecular structure of 2,4,6-tricyclohexylphenyl azide (TCHP-N<sub>3</sub>). Thermal ellipsoids shown at 20% probability; hydrogen atoms omitted.

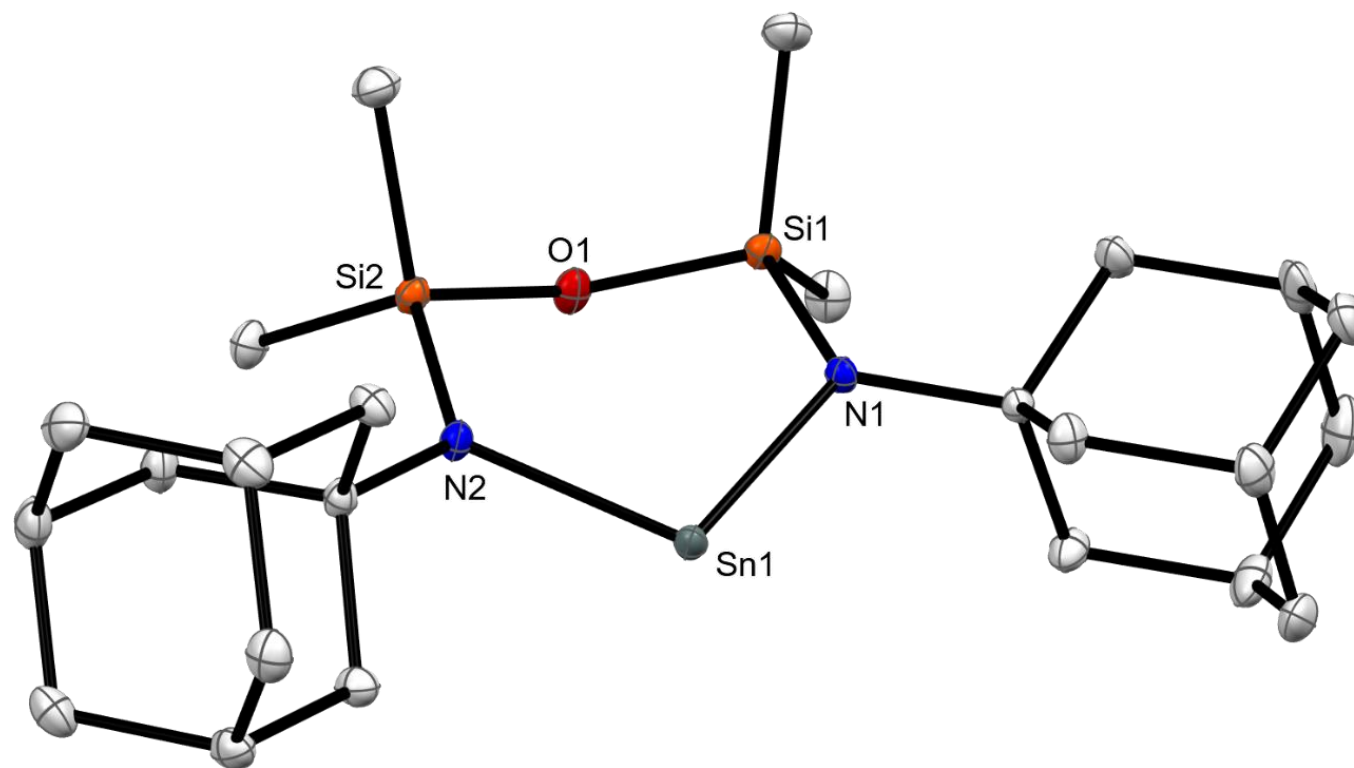

**Figure S73:** Molecular structure of  $\text{Sn}(\text{NON}^{\text{Ad}})$  (**1**). Thermal ellipsoids shown at 20% probability; hydrogen atoms omitted.

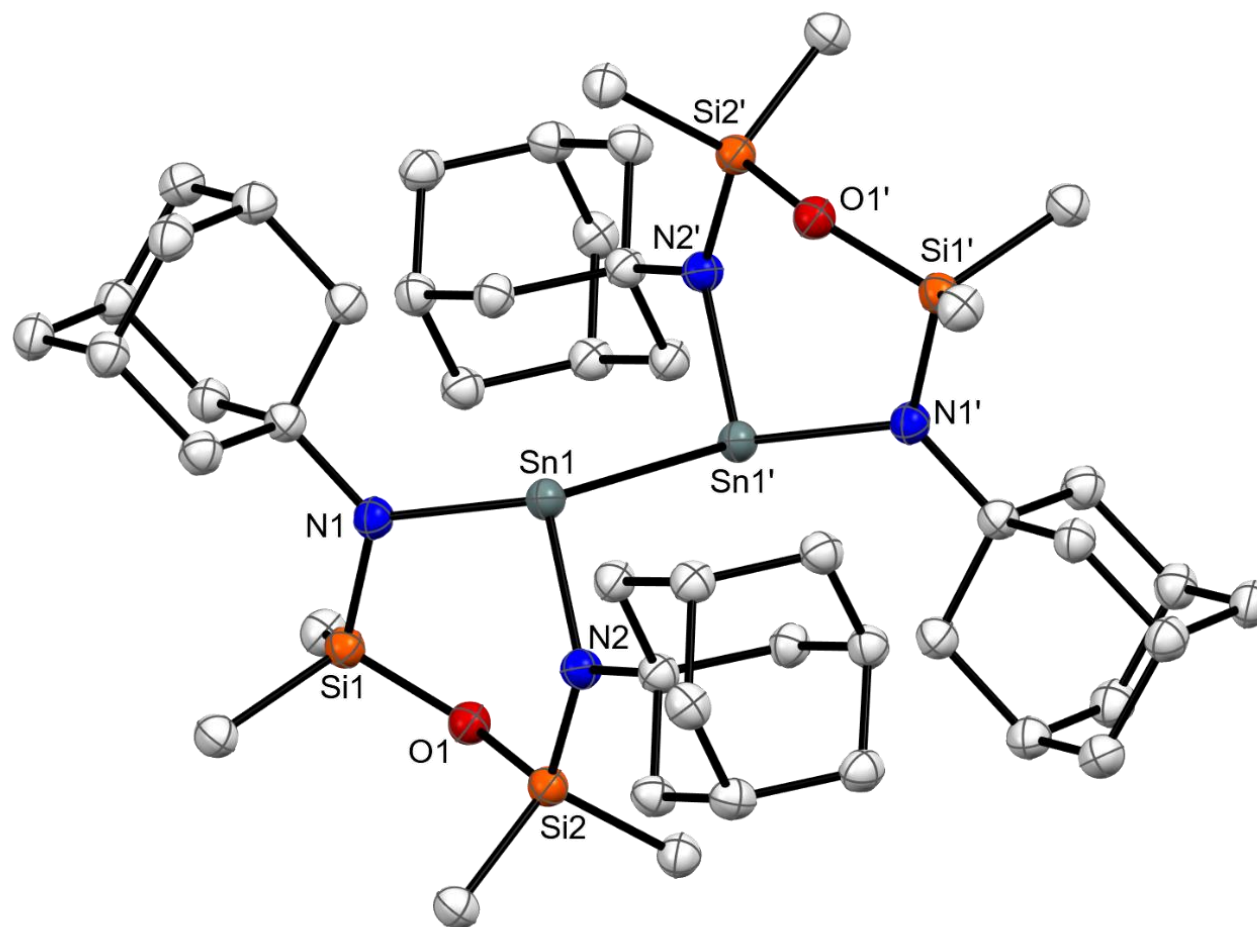

**Figure S74:** Molecular structure of  $[\text{Sn}(\text{NON}^{\text{Ad}})]_2$  ( $[\mathbf{1}]_2$ ). Thermal ellipsoids shown at 20% probability; hydrogen atoms omitted.  $\prime = 1-x, 1-y, -z$ .

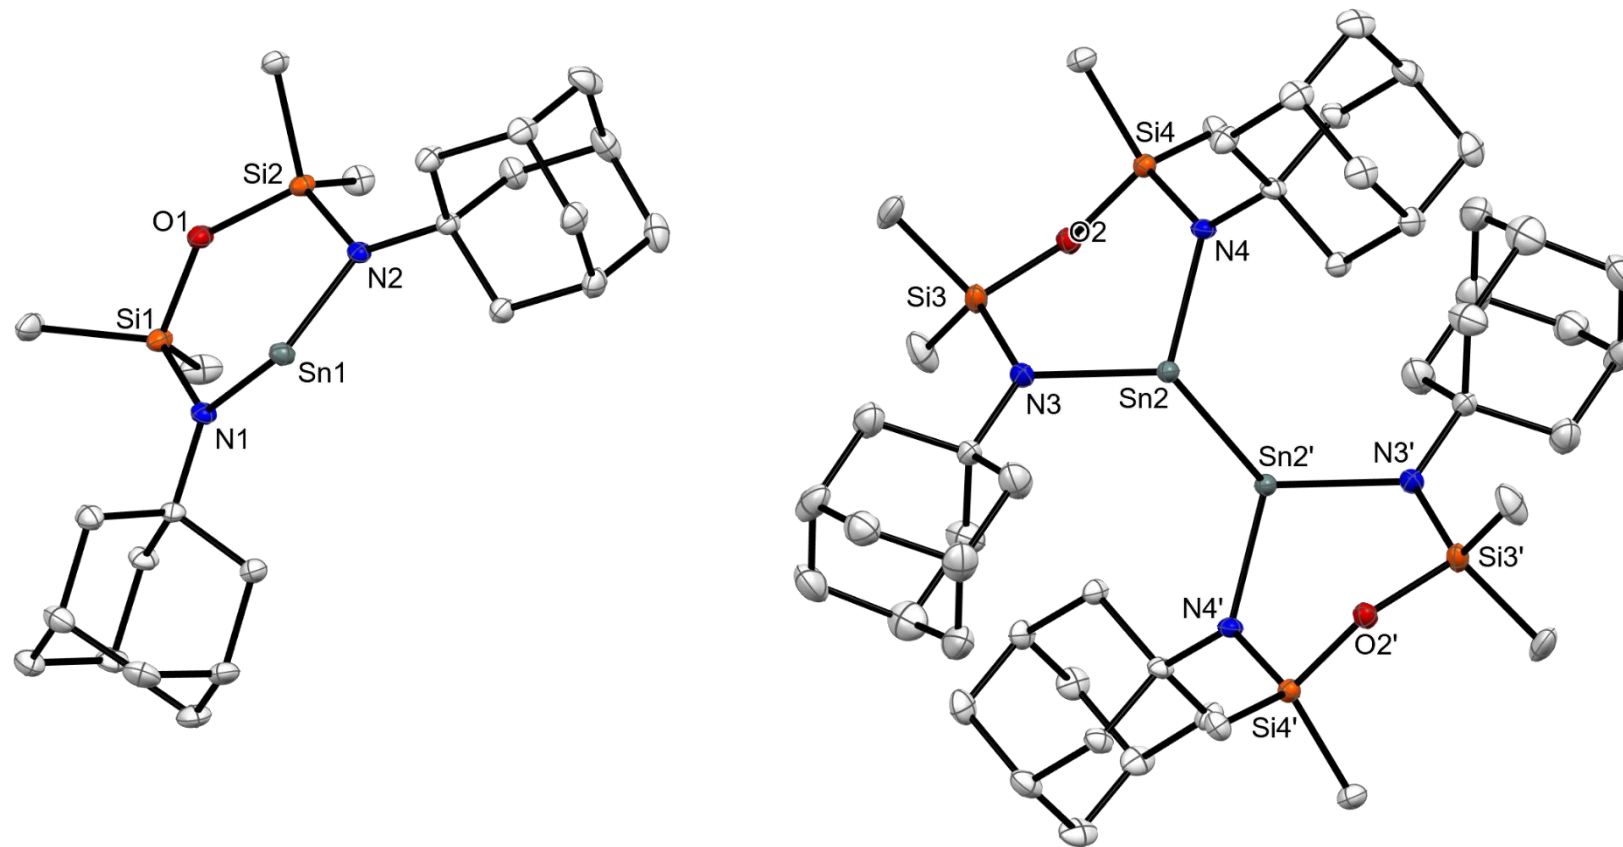

**Figure S75:** Molecular structure of co-crystallised  $\text{Sn}(\text{NON}^{\text{Ad}}) + [\text{Sn}(\text{NON}^{\text{Ad}})]_2$  ( $\mathbf{1} + [\mathbf{1}]_2$ ). Thermal ellipsoids shown at 20% probability; hydrogen atoms omitted.  $' = 2-x, 1-y, 1-z$ .



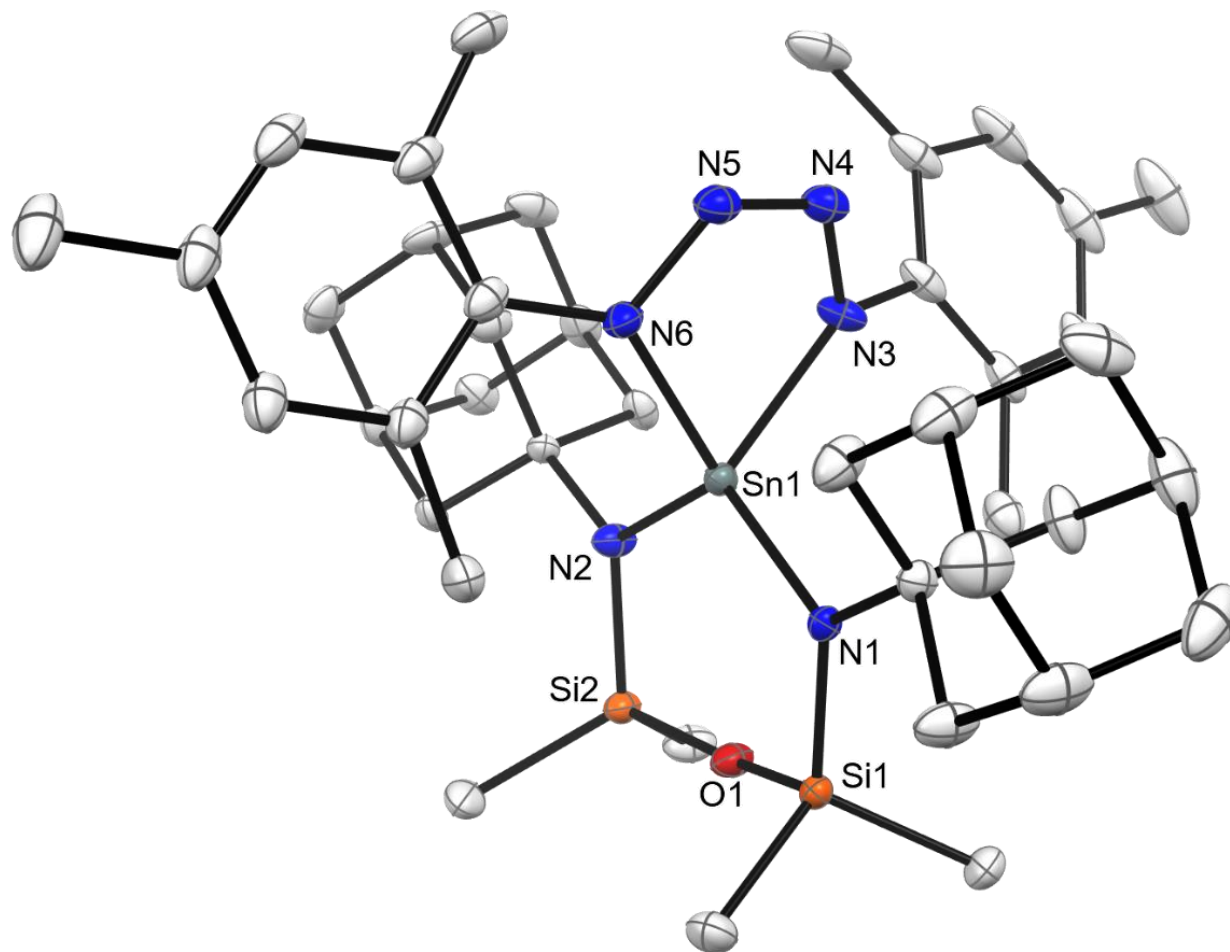

**Figure S76:** Molecular structure of  $\text{Sn}(\text{NON}^{\text{Ad}})(\text{Mes}_2\text{N}_4)$  (2). Thermal ellipsoids shown at 20% probability; hydrogen atoms omitted.



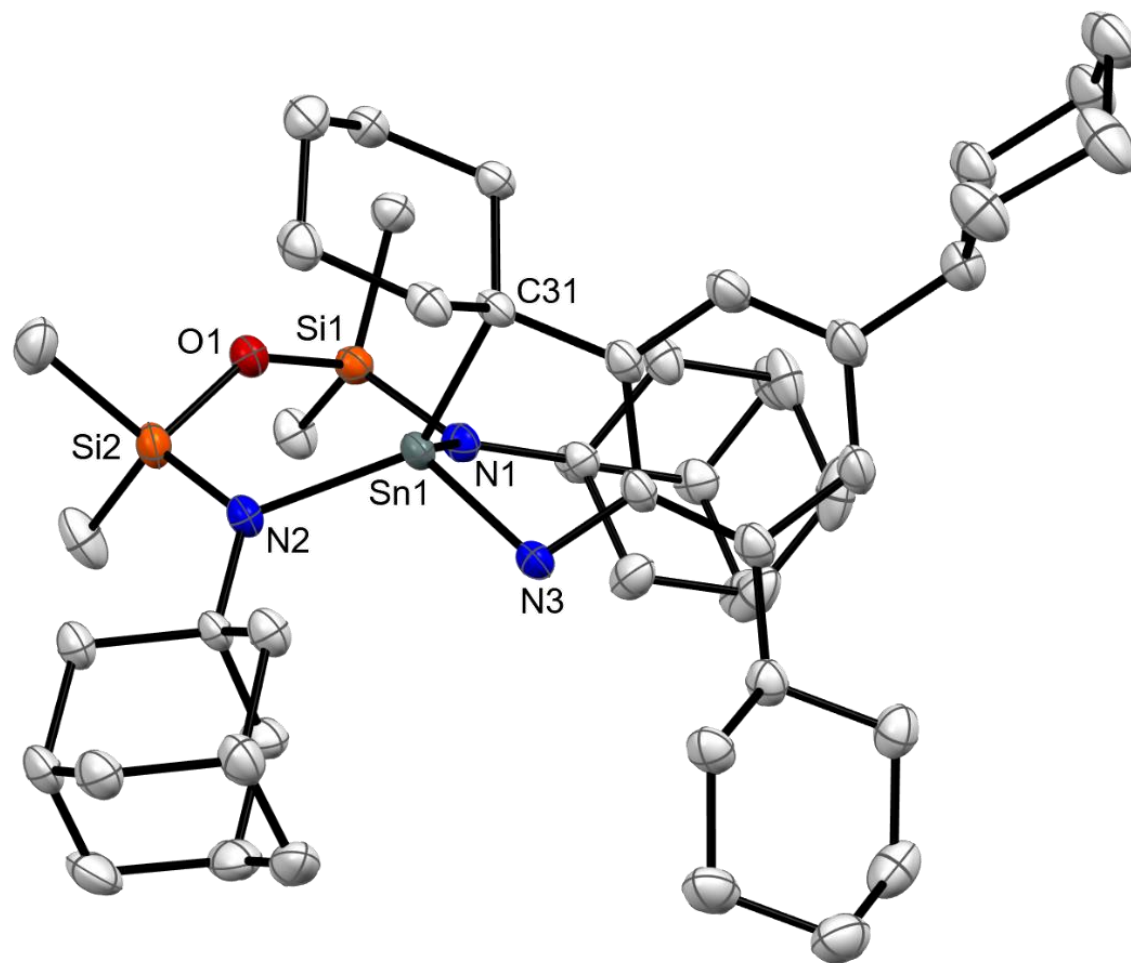

**Figure S78:** Molecular structure of  $\text{Sn}(\text{NON}^{\text{Ad}})(\text{NTCHP}^*)$  (**4**). Thermal ellipsoids shown at 20% probability; hydrogen atoms omitted.

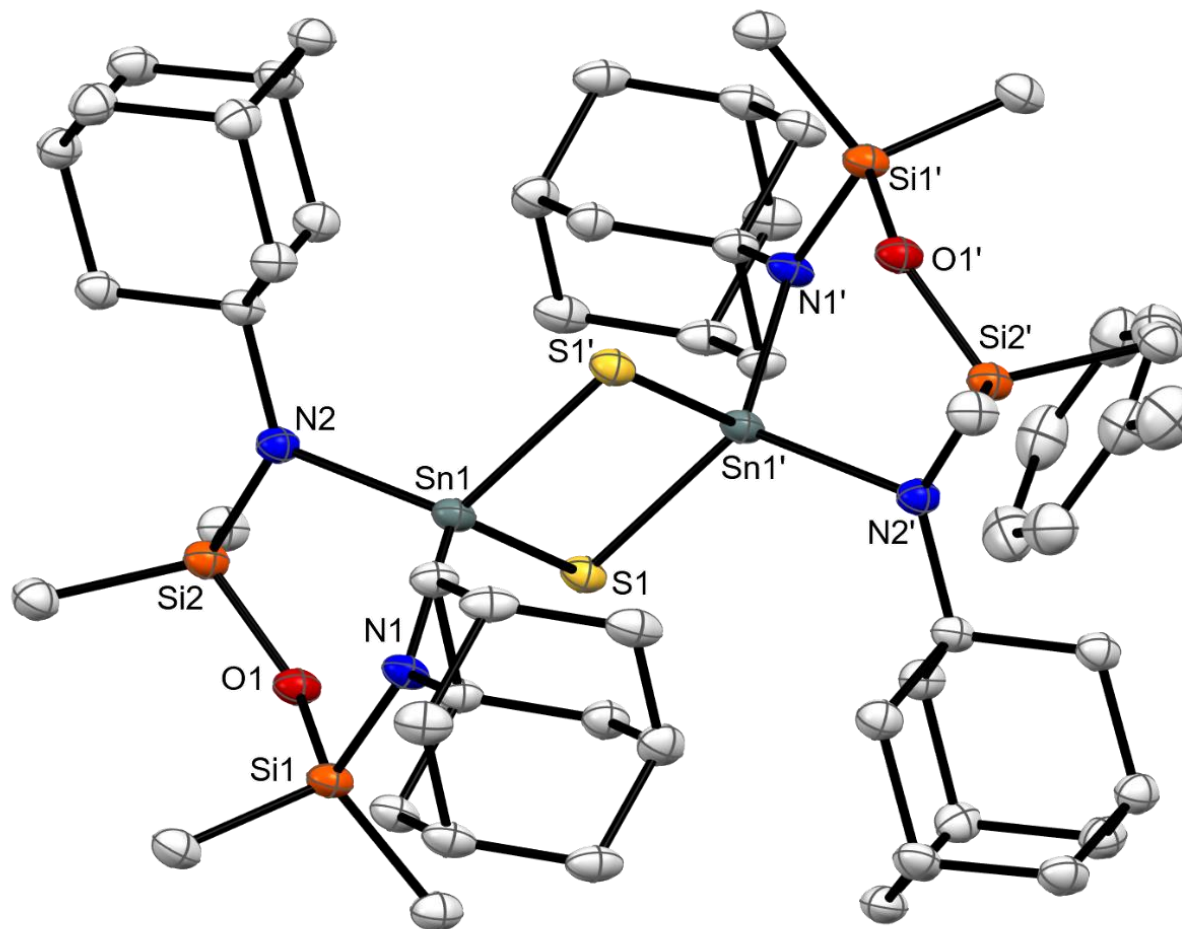

**Figure S79:** Molecular structure of  $[\text{Sn}(\text{NON}^{\text{Ad}})(\mu\text{-S})_2]$  (**7**). Thermal ellipsoids shown at 20% probability; hydrogen atoms omitted.  $' = -x -1 -y -1 -z$ .

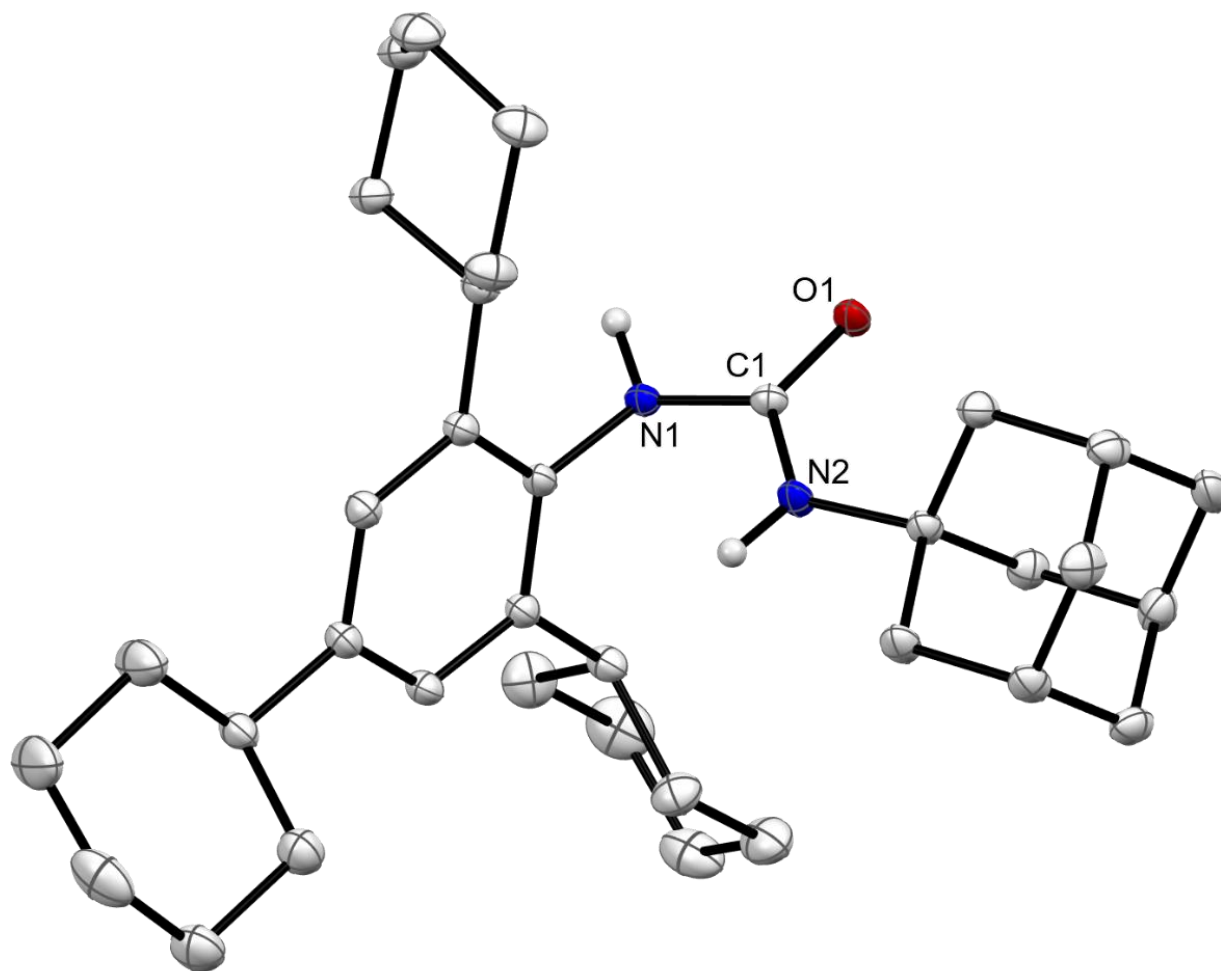

**Figure S80:** Molecular structure of 1-(1-adamantyl)-3-(2,4,6-tricyclohexylphenyl)urea (TCHP-NH-CO-NH-Ad). Thermal ellipsoids shown at 20% probability; hydrogen atoms except H1 and H2 omitted.

### 3. Computational

#### 3.1 General Details

DFT calculations were run using Gaussian 09 (Revision D.01)<sup>[S7]</sup> using the M06-2X functional and an ultrafine integration grid (keyword int=ultrafine).<sup>[S8]</sup> Geometry optimisation and frequency calculations were carried out using BS1, with and without dispersion corrections (keyword: empiricaldispersion = gd3). Single point frequency calculations were then carried out at BS2 to obtain the final free energies.<sup>[S9]</sup> The M06-2X functional and BS2 were tested against the solid-state data (**Table S2**) and have recently been used by Fischer, Aldridge and co-workers in a related stannamine project.<sup>[S10]</sup>

BS1 was built as follows. Sn centres were described with Stuttgart SDDAll RECPs and associated basis sets, while 6-31g\*\* was used for all other atoms (C, H, N, O, Si, S).<sup>[S11]–[S13]</sup>

BS2 was built as follows. Sn centres were described with Stuttgart SDDAll RECPs and associated basis sets, while def2-SVP was used for all other atoms (C, H, N, O, Si, S).<sup>[S14]</sup>

Geometry optimisations were performed without symmetry constraints (keyword = nosymm). Frequency analyses for all stationary points were performed to confirm their nature of the structures as minima (no imaginary frequency). Single point solvent corrections (benzene, epsilon = 2.2706) were applied using the polarised continuum model (PCM) to free energies.<sup>[S15]</sup> Gaussview 5.0.9 was used to visualise the various properties of compounds.<sup>[S16]</sup>

Natural Bond Orbital (NBO) analysis was carried out in NBO 6.0.<sup>[S17],[S18]</sup> A full NBO analysis for select stationary points was carried out and the relevant NPA charges and Wiberg Bond Indices recorded (**Figure S85**). ETS-NOCV calculations were performed using DFT as implemented in ORCA 4.2.1.<sup>[S19],[S20]</sup> The optimised geometry of stannamine complex **3** from the Gaussian 09 calculation detailed above was used as the input geometry. Single point calculations were performed using the M06-2X functional on the relevant fragments (**Figure S87**). The def2-tzvp basis set was used for all atoms.<sup>[S14]</sup> Graphical surface representations were plotted using Avogadro 1.2.0 (**Figure S88**).

### 3.2 Computed Structures

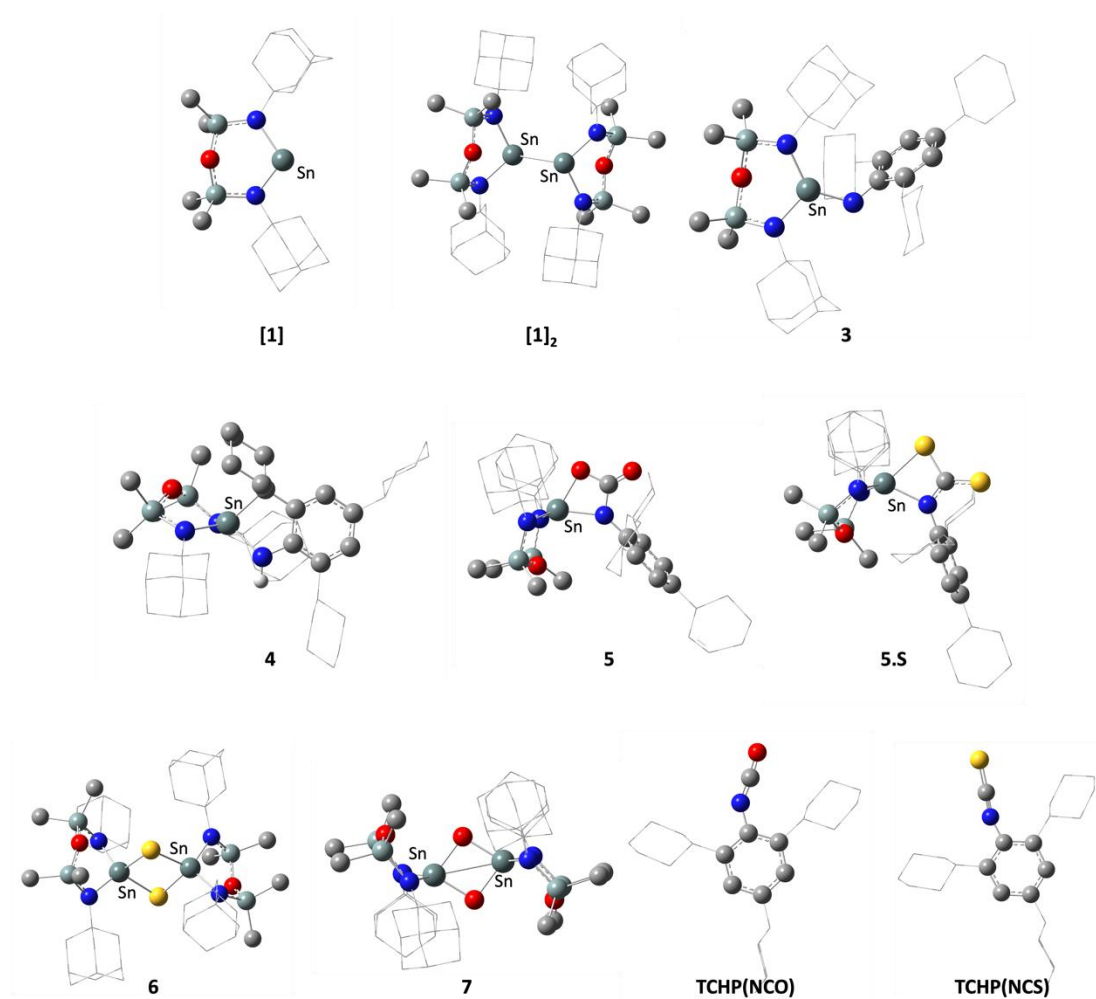

**Figure S81:** Structures of all stationary point minima as calculated by DFT (grey = carbon, white = hydrogen, red = oxygen, blue = nitrogen, yellow = sulphur, teal = silicon or tin, labelled). Most hydrogen atoms omitted and adamantly/cyclohexyl units shown in wireframe for clarity.

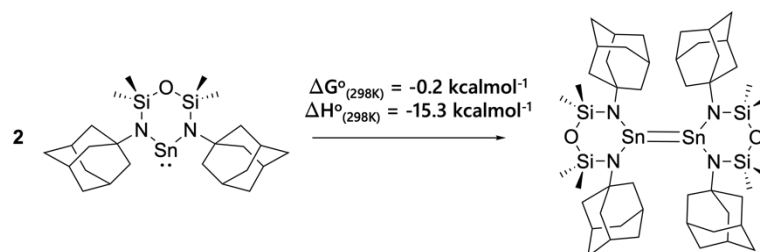

**Figure S82:** Equilibria for monomer-dimer relationship of 1/[1]<sub>2</sub> (M06-2X).

**Table S2.** Comparison of DFT calculated structures to solid-state data (Å); DFT(disp) includes dispersion corrections in the geometry optimisation calculation.

|                        |           | Sn=N  | Sn-Sn | Sn-N         | N-Si         |
|------------------------|-----------|-------|-------|--------------|--------------|
| <b>1</b>               | XRD       | -     | -     | 2.093, 2.092 | 1.724, 1.725 |
|                        | DFT       | -     | -     | 2.118, 2.129 | 1.737, 1.739 |
|                        | DFT(disp) | -     | -     | 2.117, 2.129 | 1.738, 1.737 |
| <b>[1]<sub>2</sub></b> | XRD       | -     | 3.145 | 2.091, 2.095 | 1.720, 1.725 |
|                        | DFT       | -     | 3.202 | 2.114, 2.114 | 1.735, 1.736 |
|                        | DFT(disp) | -     | 3.190 | 2.113, 2.113 | 1.736, 1.736 |
| <b>3</b>               | XRD       | 1.934 | -     | 2.046, 2.027 | 1.733, 1.731 |
|                        | DFT       | 1.917 | -     | 2.044, 2.030 | 1.749, 1.747 |
|                        | DFT(disp) | 1.917 | -     | 2.044, 2.030 | 1.749, 1.747 |
| <b>4</b>               | XRD       | 2.062 | -     | 2.090, 2.053 | 1.714, 1.718 |
|                        | DFT       | 2.077 | -     | 2.093, 2.062 | 1.741, 1.741 |
|                        | DFT(disp) | 2.078 | -     | 2.092, 2.060 | 1.741, 1.740 |
| <b>5</b>               | XRD       | 2.087 | -     | 2.014, 2.036 | 1.740, 1.732 |
|                        | DFT       | 2.067 | -     | 2.026, 2.026 | 1.744, 1.740 |
|                        | DFT(disp) | 2.065 | -     | 2.026, 2.026 | 1.744, 1.740 |



### 3.3 Molecular Orbitals

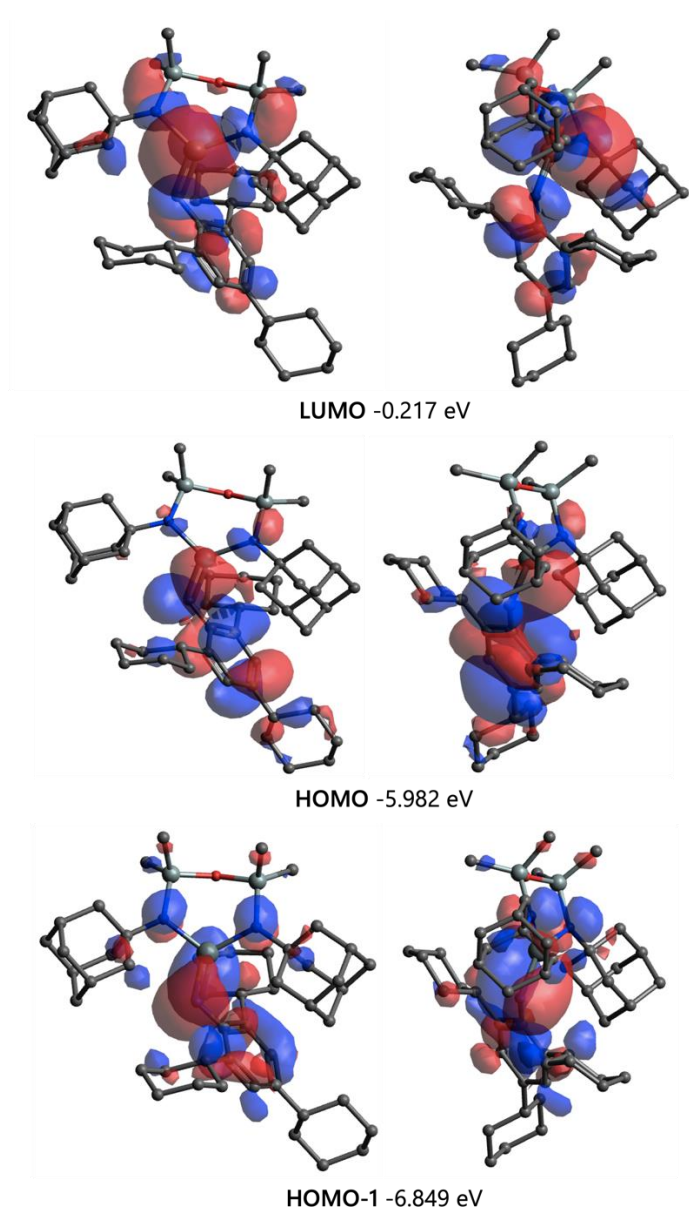

**Figure S83:** Selected molecular orbitals of the optimised structure of stannamine complex **3**. HOMO-LUMO gap = 5.77 eV.

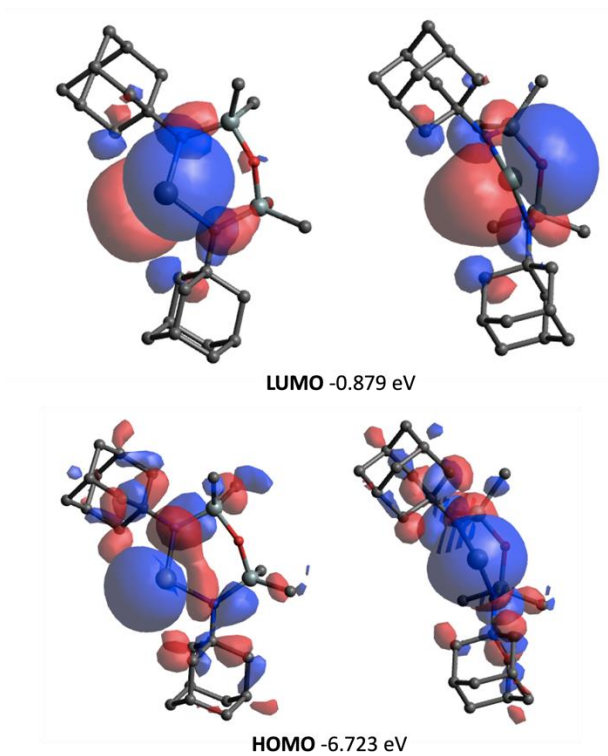

**Figure S84:** Selected molecular orbitals of the optimized structure of stannylene monomer complex 1. HOMO-LUMO gap = 5.84 eV.

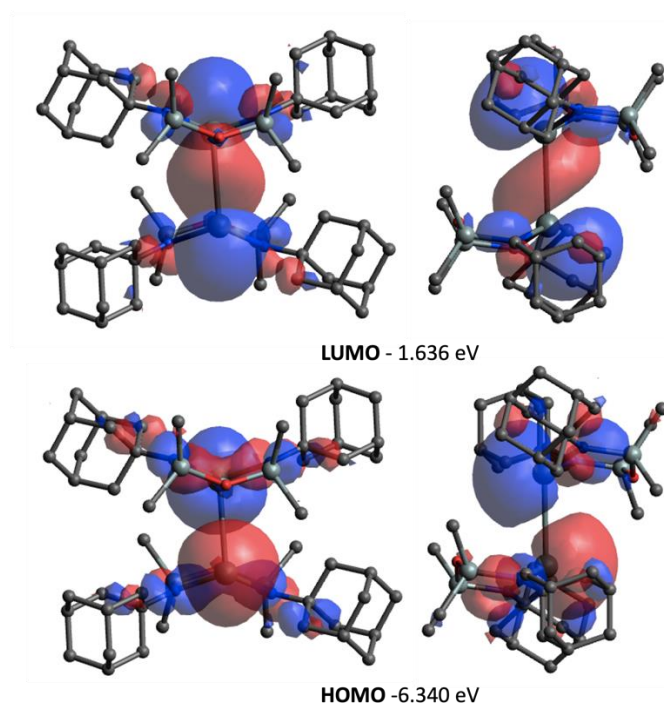

**Figure S85:** Selected molecular orbitals of the optimized structure of stannylene dimer complex [1]<sub>2</sub>. HOMO-LUMO gap = 4.70 eV.

### 3.4 Natural Bond Orbital (NBO) Analysis

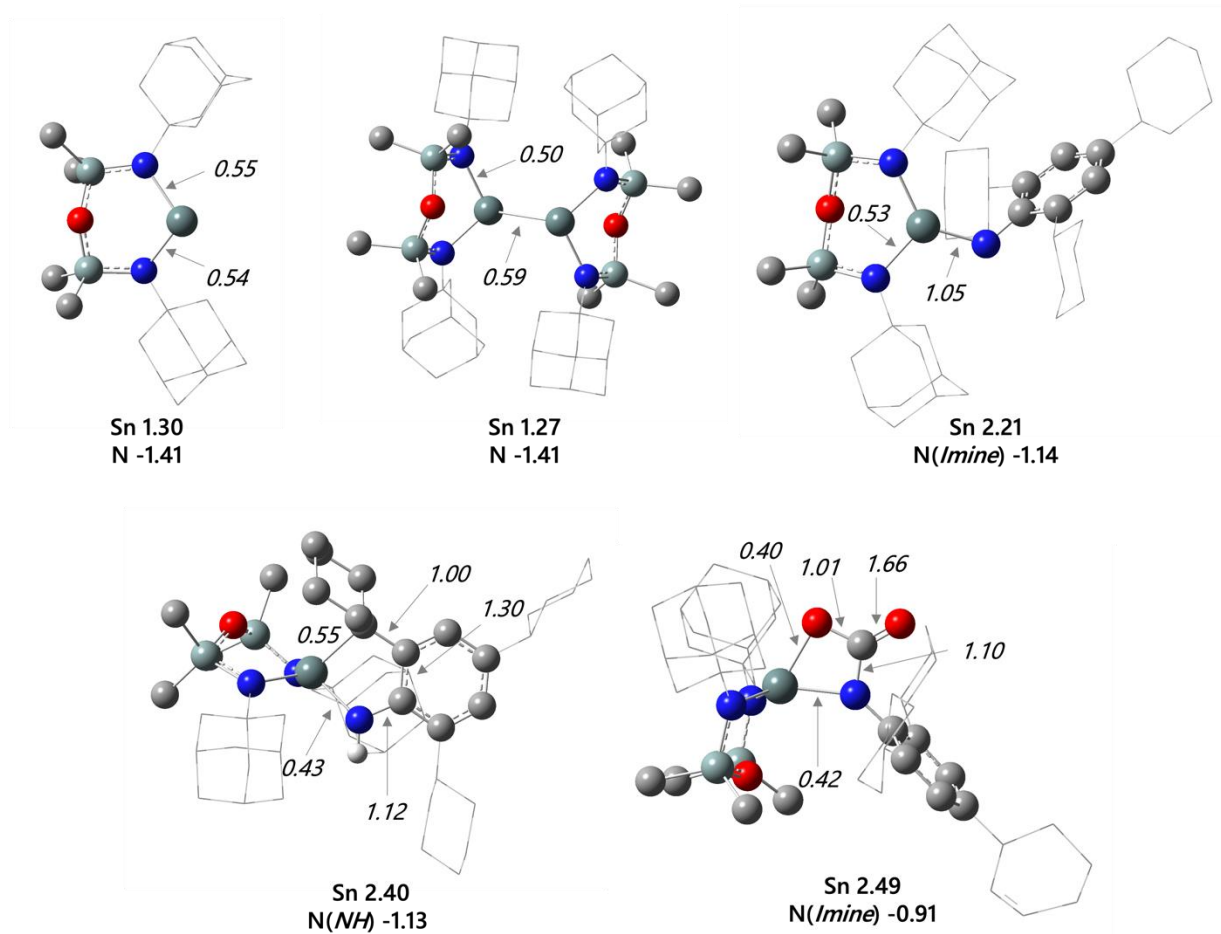

**Figure S86:** Select DFT optimised structures with NBO analysis annotated; Select Natural Population Analysis (NPA) Charges shown in bold, and Wiberg Bond Indices (WBI) annotated in italics.

### 3.5 DFT Calculated Thermodynamics

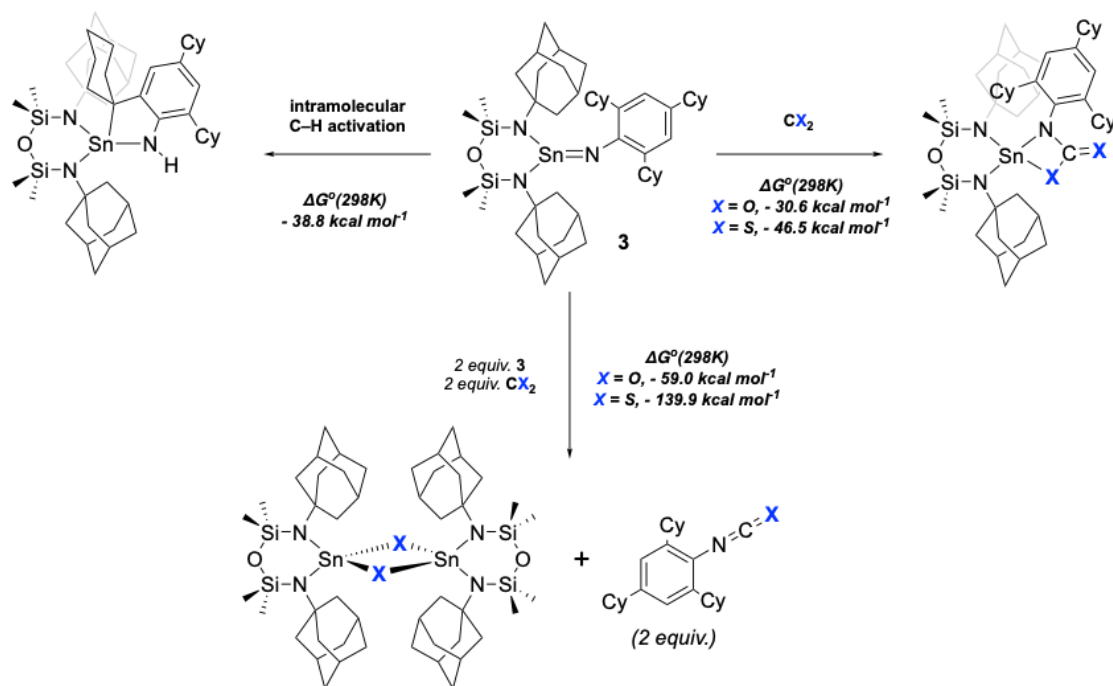

**Figure S87:** DFT calculated thermodynamics (298.15 K and 1 atm) for intramolecular C–H activation and [2+2] cycloaddition reactions with  $CO_2$  and  $CS_2$  of stannamine **3** (Gibbs Free Energy, M06-2X).

### 3.6 Extended Transition State- Natural Orbital Chemical Valence (ETS-NOCV) Calculations

Stannamine complex **3** was fragmented at the Sn=N bond and submitted for ETS-NOCV calculations as described above. The total orbital interaction energy ( $\Delta E_{ORB}$ ) was calculated as  $-243.7 \text{ kcal mol}^{-1}$ .

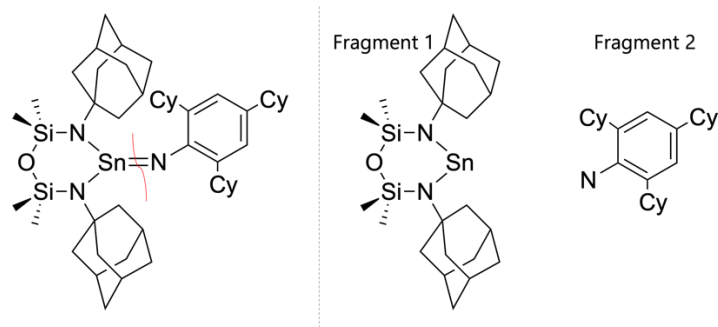

**Figure S88:** Fragments of stannamine complex **3** used for ETS-NOCV calculations.

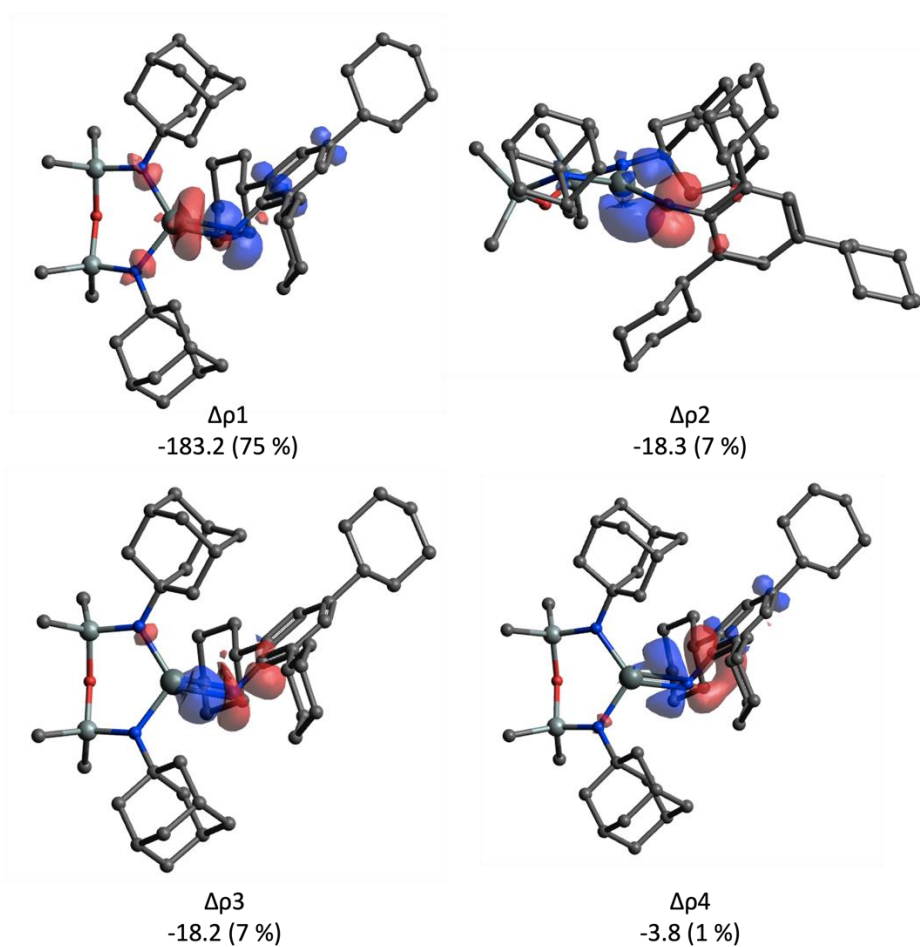

**Figure S89:** Plots all energies in kcal mol<sup>-1</sup> with the percentage contribution to the overall orbital interaction energy ( $\Delta E_{\text{ORB}} = -243.7$  kcal mol<sup>-1</sup>) shown in brackets. Charge flow is from red to blue (isovalue = 0.01)

### 3.7 Cartesian Coordinates

1-dimer.log

SCF (M06-2X) = -3411.35344291

E(SCF)+ZPE(0 K)= -3410.085398

H(298 K)= -3410.027845

G(298 K)= -3410.173291

Lowest Frequency = -164.0660 cm<sup>-1</sup>

|    |           |           |          |
|----|-----------|-----------|----------|
| Sn | 6.934149  | 8.181986  | 1.576564 |
| Si | 9.181429  | 5.880193  | 2.175967 |
| Si | 6.192778  | 5.170017  | 2.632549 |
| O  | 7.680073  | 5.228062  | 1.894274 |
| N  | 8.878209  | 7.589199  | 2.159697 |
| N  | 5.682506  | 6.829298  | 2.612779 |
| C  | 9.894752  | 8.606320  | 2.470156 |
| C  | 4.312671  | 7.267368  | 2.923857 |
| C  | 3.661054  | 6.343209  | 3.975615 |
| H  | 4.282247  | 6.342926  | 4.880481 |
| H  | 3.633286  | 5.313538  | 3.595293 |
| C  | 3.419651  | 7.267583  | 1.665591 |
| H  | 3.876371  | 7.917852  | 0.902909 |
| H  | 3.403738  | 6.251038  | 1.249921 |
| C  | 4.306908  | 8.696617  | 3.511868 |
| H  | 4.948093  | 8.711601  | 4.403219 |
| H  | 4.739069  | 9.397125  | 2.782268 |
| C  | 2.881918  | 9.162180  | 3.848595 |
| H  | 2.922641  | 10.178499 | 4.256805 |
| C  | 11.299102 | 8.155745  | 2.010776 |
| H  | 11.561087 | 7.212236  | 2.508611 |
| H  | 11.274100 | 7.961778  | 0.931529 |
| C  | 9.953522  | 8.879527  | 3.989191 |

|   |           |           |           |
|---|-----------|-----------|-----------|
| H | 8.958973  | 9.208030  | 4.321849  |
| H | 10.173317 | 7.940995  | 4.513135  |
| C | 2.262532  | 8.212384  | 4.882400  |
| H | 1.246885  | 8.541908  | 5.134276  |
| H | 2.850356  | 8.226945  | 5.808548  |
| C | 6.397553  | 4.430136  | 4.347715  |
| H | 7.080139  | 3.574933  | 4.306198  |
| H | 5.446709  | 4.079973  | 4.759632  |
| H | 6.813829  | 5.164672  | 5.043381  |
| C | 12.367003 | 9.207644  | 2.340777  |
| H | 13.345244 | 8.841583  | 2.007094  |
| C | 2.030342  | 9.152679  | 2.569764  |
| H | 2.449356  | 9.847809  | 1.832303  |
| H | 1.012185  | 9.492536  | 2.796929  |
| C | 12.392963 | 9.447162  | 3.857694  |
| H | 13.162421 | 10.187880 | 4.108438  |
| H | 12.653638 | 8.516900  | 4.378397  |
| C | 1.379667  | 6.774084  | 3.024015  |
| H | 0.349987  | 7.074950  | 3.253550  |
| H | 1.338583  | 5.756262  | 2.614314  |
| C | 2.228994  | 6.791402  | 4.304510  |
| H | 1.798592  | 6.102902  | 5.040841  |
| C | 1.991676  | 7.731015  | 1.989894  |
| H | 1.386121  | 7.721002  | 1.073778  |
| C | 9.857022  | 5.217289  | 3.799635  |
| H | 9.248540  | 5.556743  | 4.643057  |
| H | 10.889028 | 5.533005  | 3.983244  |
| H | 9.842808  | 4.122326  | 3.790593  |
| C | 10.206229 | 5.242607  | 0.738966  |
| H | 10.203000 | 4.147822  | 0.742094  |
| H | 11.244332 | 5.584219  | 0.741782  |
| H | 9.737110  | 5.569463  | -0.196558 |

|    |           |           |           |
|----|-----------|-----------|-----------|
| C  | 5.180050  | 4.014484  | 1.551527  |
| H  | 5.266098  | 4.337823  | 0.508712  |
| H  | 4.117858  | 3.971050  | 1.810062  |
| H  | 5.583831  | 2.998852  | 1.617217  |
| C  | 11.014616 | 9.941680  | 4.322190  |
| H  | 11.030194 | 10.112648 | 5.404839  |
| C  | 9.588483  | 9.945377  | 1.769773  |
| H  | 9.509594  | 9.771955  | 0.688915  |
| H  | 8.613776  | 10.328093 | 2.108162  |
| C  | 10.652130 | 11.007356 | 2.080430  |
| H  | 10.392613 | 11.934862 | 1.556279  |
| C  | 12.027634 | 10.514280 | 1.612733  |
| H  | 12.790887 | 11.274507 | 1.820374  |
| H  | 12.018893 | 10.346970 | 0.526911  |
| C  | 10.680279 | 11.253881 | 3.596491  |
| H  | 11.428392 | 12.018709 | 3.839374  |
| H  | 9.706660  | 11.632399 | 3.932175  |
| Sn | 6.947252  | 7.626215  | -1.576576 |
| Si | 4.699961  | 9.927997  | -2.175986 |
| Si | 7.688611  | 10.638191 | -2.632552 |
| O  | 6.201312  | 10.580136 | -1.894287 |
| N  | 5.003189  | 8.218992  | -2.159704 |
| N  | 8.198889  | 8.978911  | -2.612788 |
| C  | 3.986649  | 7.201864  | -2.470156 |
| C  | 9.568728  | 8.540849  | -2.923862 |
| C  | 10.220346 | 9.465017  | -3.975611 |
| H  | 9.599158  | 9.465304  | -4.880479 |
| H  | 10.248109 | 10.494685 | -3.595281 |
| C  | 10.461742 | 8.540629  | -1.665591 |
| H  | 10.005021 | 7.890353  | -0.902915 |
| H  | 10.477649 | 9.557171  | -1.249915 |
| C  | 9.574498  | 7.111603  | -3.511882 |



|   |           |           |           |
|---|-----------|-----------|-----------|
| H | 8.933318  | 7.096624  | -4.403236 |
| H | 9.142337  | 6.411089  | -2.782289 |
| C | 10.999492 | 6.646048  | -3.848606 |
| H | 10.958775 | 5.629731  | -4.256823 |
| C | 2.582296  | 7.652440  | -2.010786 |
| H | 2.320310  | 8.595943  | -2.508633 |
| H | 2.607293  | 7.846419  | -0.931542 |
| C | 3.927886  | 6.928639  | -3.989187 |
| H | 4.922437  | 6.600135  | -4.321837 |
| H | 3.708091  | 7.867164  | -4.513143 |
| C | 11.618879 | 7.595853  | -4.882402 |
| H | 12.634529 | 7.266335  | -5.134274 |
| H | 11.031060 | 7.581296  | -5.808552 |
| C | 7.483846  | 11.378083 | -4.347713 |
| H | 6.801252  | 12.233280 | -4.306195 |
| H | 8.434690  | 11.728257 | -4.759620 |
| H | 7.067582  | 10.643550 | -5.043389 |
| C | 1.514400  | 6.600534  | -2.340779 |
| H | 0.536156  | 6.966597  | -2.007104 |
| C | 11.851062 | 6.655544  | -2.569771 |
| H | 11.432047 | 5.960407  | -1.832316 |
| H | 12.869222 | 6.315693  | -2.796933 |
| C | 1.488446  | 6.360998  | -3.857693 |
| H | 0.718992  | 5.620274  | -4.108431 |
| H | 1.227771  | 7.291252  | -4.378409 |
| C | 12.501730 | 9.034145  | -3.024003 |
| H | 13.531413 | 8.733284  | -3.253535 |
| H | 12.542809 | 10.051964 | -2.614295 |
| C | 11.652409 | 9.016832  | -4.304502 |
| H | 12.082813 | 9.705338  | -5.040826 |
| C | 11.889720 | 8.077204  | -1.989890 |
| H | 12.495271 | 8.087213  | -1.073772 |

|   |          |           |           |
|---|----------|-----------|-----------|
| C | 4.024377 | 10.590887 | -3.799663 |
| H | 4.632870 | 10.251431 | -4.643078 |
| H | 2.992375 | 10.275162 | -3.983280 |
| H | 4.038583 | 11.685849 | -3.790629 |
| C | 3.675151 | 10.565587 | -0.738995 |
| H | 3.678379 | 11.660373 | -0.742129 |
| H | 2.637048 | 10.223975 | -0.741814 |
| H | 4.144266 | 10.238737 | 0.196533  |
| C | 8.701328 | 11.793719 | -1.551515 |
| H | 8.615277 | 11.470371 | -0.508702 |
| H | 9.763521 | 11.837162 | -1.810044 |
| H | 8.297541 | 12.809350 | -1.617196 |
| C | 2.866797 | 5.866478  | -4.322178 |
| H | 2.851224 | 5.695497  | -5.404824 |
| C | 4.292920 | 5.862816  | -1.769755 |
| H | 4.371805 | 6.036252  | -0.688899 |
| H | 5.267629 | 5.480099  | -2.108136 |
| C | 3.229277 | 4.800831  | -2.080403 |
| H | 3.488795 | 3.873331  | -1.556239 |
| C | 1.853769 | 5.293908  | -1.612718 |
| H | 1.090520 | 4.533677  | -1.820353 |
| H | 1.862505 | 5.461232  | -0.526898 |
| C | 3.201135 | 4.554287  | -3.596461 |
| H | 2.453025 | 3.789454  | -3.839338 |
| H | 4.174757 | 4.175767  | -3.932136 |

1.log

SCF (M06-2X) = -1705.66513850

E(SCF)+ZPE(0 K)= -1705.031382

H(298 K)= -1705.003575

G(298 K)= -1705.086061

Lowest Frequency = -168.0352 cm<sup>-1</sup>

|    |           |          |           |
|----|-----------|----------|-----------|
| Si | 10.123145 | 5.274257 | 12.338220 |
| Si | 8.492886  | 3.975373 | 14.575407 |
| O  | 9.849421  | 4.543682 | 13.806626 |
| N  | 10.058389 | 3.948213 | 11.217417 |
| N  | 7.853017  | 2.821685 | 13.442086 |
| C  | 10.409279 | 4.025863 | 9.787642  |
| C  | 6.716324  | 1.935824 | 13.762156 |
| C  | 9.113686  | 3.222493 | 16.180024 |
| H  | 9.838236  | 2.430301 | 15.968142 |
| H  | 8.316002  | 2.794854 | 16.795011 |
| H  | 9.620068  | 3.988607 | 16.775980 |
| C  | 8.774188  | 6.547491 | 12.022115 |
| H  | 7.803556  | 6.049804 | 11.925446 |
| H  | 8.953050  | 7.102749 | 11.095466 |
| H  | 8.706314  | 7.273739 | 12.838545 |
| C  | 11.262152 | 2.814549 | 9.344777  |
| H  | 12.173304 | 2.789608 | 9.955917  |
| H  | 10.718616 | 1.880790 | 9.536832  |
| C  | 5.749098  | 2.605403 | 14.763004 |
| H  | 6.282582  | 2.833822 | 15.695004 |
| H  | 5.402649  | 3.556852 | 14.340352 |
| C  | 11.776058 | 6.136736 | 12.542695 |
| H  | 11.774783 | 6.634893 | 13.517441 |
| H  | 11.971925 | 6.890476 | 11.776549 |
| H  | 12.599128 | 5.416502 | 12.538884 |
| C  | 7.185331  | 0.597902 | 14.378374 |
| H  | 7.763832  | 0.811386 | 15.286444 |
| H  | 7.863586  | 0.095748 | 13.674519 |
| C  | 10.304152 | 2.909788 | 7.028931  |
| H  | 10.537393 | 2.942720 | 5.957451  |

|   |           |           |           |
|---|-----------|-----------|-----------|
| H | 9.731641  | 1.991142  | 7.209303  |
| C | 4.703224  | 0.703351  | 12.799664 |
| H | 4.158133  | 0.495259  | 11.871762 |
| C | 11.604195 | 2.888464  | 7.848148  |
| H | 12.198331 | 2.009860  | 7.571660  |
| C | 11.229763 | 5.293105  | 9.466239  |
| H | 10.660753 | 6.184494  | 9.764455  |
| H | 12.154460 | 5.277541  | 10.054554 |
| C | 5.896094  | 1.619904  | 12.489913 |
| H | 5.561597  | 2.567158  | 12.047511 |
| H | 6.537164  | 1.120616  | 11.749883 |
| C | 9.466259  | 4.136191  | 7.421949  |
| H | 8.537426  | 4.151682  | 6.840071  |
| C | 10.270346 | 5.414972  | 7.148902  |
| H | 9.675335  | 6.296982  | 7.417169  |
| H | 10.504793 | 5.492076  | 6.080009  |
| C | 9.130899  | 4.061731  | 8.917980  |
| H | 8.520102  | 4.919701  | 9.228719  |
| H | 8.538947  | 3.155679  | 9.119322  |
| C | 7.379018  | 5.436509  | 14.980997 |
| H | 8.001048  | 6.276080  | 15.309516 |
| H | 6.677071  | 5.207318  | 15.787518 |
| H | 6.801761  | 5.765247  | 14.112797 |
| C | 5.993618  | -0.318013 | 14.696645 |
| H | 6.361056  | -1.256404 | 15.127807 |
| C | 4.554424  | 1.696523  | 15.089001 |
| H | 3.902698  | 2.207825  | 15.806812 |
| C | 5.217955  | -0.612634 | 13.403572 |
| H | 5.868783  | -1.126331 | 12.684800 |
| H | 4.374657  | -1.281624 | 13.615384 |
| C | 12.405399 | 4.165635  | 7.564779  |
| H | 13.346434 | 4.152510  | 8.128365  |

|    |           |           |           |
|----|-----------|-----------|-----------|
| H  | 12.662734 | 4.221863  | 6.499716  |
| C  | 5.065745  | 0.383399  | 15.698969 |
| H  | 4.219833  | -0.268660 | 15.949734 |
| H  | 5.607267  | 0.588470  | 16.631179 |
| C  | 11.567083 | 5.385092  | 7.970127  |
| H  | 12.138650 | 6.302957  | 7.790566  |
| C  | 3.773174  | 1.397536  | 13.802949 |
| H  | 2.911930  | 0.755336  | 14.025426 |
| H  | 3.384345  | 2.329247  | 13.373845 |
| Sn | 9.097247  | 2.167047  | 11.843197 |

3.log

SCF (M06-2X) = -2694.88265967

E(SCF)+ZPE(0 K)= -2693.698919

H(298 K)= -2693.649034

G(298 K)= -2693.778210

Lowest Frequency = -177.8429 cm<sup>-1</sup>

|    |          |           |          |
|----|----------|-----------|----------|
| Sn | 4.923360 | 9.462930  | 3.828141 |
| Si | 4.644781 | 11.533062 | 6.203248 |
| Si | 2.070167 | 10.541184 | 4.701171 |
| O  | 3.258113 | 10.674010 | 5.863058 |
| N  | 6.116613 | 8.041218  | 3.347284 |
| N  | 5.706683 | 10.978867 | 4.928223 |
| N  | 2.957876 | 9.809027  | 3.386221 |
| C  | 5.725937 | 6.899621  | 2.655025 |
| C  | 7.166509 | 11.202659 | 4.874848 |
| C  | 4.976421 | 5.853625  | 3.270521 |
| C  | 7.514328 | 12.546307 | 5.545426 |
| H  | 7.185804 | 12.536063 | 6.593543 |
| H  | 6.972722 | 13.352699 | 5.033999 |

|   |          |           |           |
|---|----------|-----------|-----------|
| C | 2.356227 | 9.148856  | 2.212380  |
| C | 1.992103 | 7.683361  | 2.517580  |
| H | 1.304987 | 7.652854  | 3.373719  |
| H | 2.904055 | 7.144684  | 2.803101  |
| C | 4.492910 | 6.025541  | 4.694187  |
| H | 4.059875 | 7.040144  | 4.777371  |
| C | 6.150776 | 6.726451  | 1.308895  |
| C | 3.332796 | 9.163866  | 1.019212  |
| H | 4.243711 | 8.603860  | 1.278073  |
| H | 3.615711 | 10.203669 | 0.803784  |
| C | 5.848524 | 5.541809  | 0.637195  |
| H | 6.176466 | 5.412154  | -0.391035 |
| C | 7.650950 | 11.270842 | 3.412192  |
| H | 7.440318 | 10.310865 | 2.916378  |
| H | 7.092220 | 12.059799 | 2.890751  |
| C | 7.935166 | 10.072496 | 5.588301  |
| H | 7.594806 | 10.015160 | 6.631084  |
| H | 7.690141 | 9.118469  | 5.101265  |
| C | 6.945926 | 7.831856  | 0.648799  |
| H | 6.487946 | 8.786715  | 0.955086  |
| C | 1.403367 | 12.242803 | 4.294018  |
| H | 1.137831 | 12.779059 | 5.210705  |
| H | 0.508356 | 12.184752 | 3.668066  |
| H | 2.150167 | 12.833446 | 3.755539  |
| C | 9.163720 | 11.534856 | 3.348440  |
| H | 9.479217 | 11.577629 | 2.300188  |
| C | 1.362970 | 7.007052  | 1.291280  |
| H | 1.121461 | 5.966244  | 1.538207  |
| C | 1.079692 | 9.897493  | 1.779976  |
| H | 0.353792 | 9.901777  | 2.604646  |
| H | 1.334882 | 10.941851 | 1.557634  |
| C | 5.117579 | 4.515279  | 1.231268  |

|   |           |           |           |
|---|-----------|-----------|-----------|
| C | 5.648946  | 5.966829  | 5.707572  |
| H | 6.057268  | 4.946807  | 5.702356  |
| H | 6.445898  | 6.641372  | 5.383477  |
| C | 4.772473  | 3.256390  | 0.466805  |
| H | 5.230853  | 3.336443  | -0.530654 |
| C | 0.441012  | 9.222152  | 0.554905  |
| H | -0.468720 | 9.769207  | 0.281974  |
| C | 4.689532  | 4.698235  | 2.547918  |
| H | 4.111106  | 3.909892  | 3.022470  |
| C | 9.899782  | 10.391573 | 4.062717  |
| H | 10.983715 | 10.552468 | 4.008017  |
| H | 9.681856  | 9.439613  | 3.562400  |
| C | 8.393230  | 7.867459  | 1.171401  |
| H | 8.369473  | 7.909929  | 2.265102  |
| H | 8.890265  | 6.929784  | 0.885112  |
| C | 9.028730  | 12.803786 | 5.499936  |
| H | 9.242490  | 13.756570 | 5.997771  |
| C | 4.998696  | 0.732605  | 0.331152  |
| H | 5.485853  | 0.787805  | -0.652087 |
| H | 5.399206  | -0.154962 | 0.832207  |
| C | 1.433474  | 9.249676  | -0.615560 |
| H | 0.982782  | 8.782612  | -1.499768 |
| H | 1.674012  | 10.286944 | -0.880604 |
| C | 0.740451  | 9.462132  | 5.451837  |
| H | 1.168028  | 8.503386  | 5.759803  |
| H | -0.092120 | 9.260437  | 4.772204  |
| H | 0.335313  | 9.951503  | 6.343295  |
| C | 3.372885  | 5.073533  | 5.124408  |
| H | 3.750435  | 4.041745  | 5.131943  |
| H | 2.548621  | 5.107352  | 4.400840  |
| C | 6.945252  | 7.795383  | -0.882746 |
| H | 5.915001  | 7.759691  | -1.258641 |

|   |           |           |           |
|---|-----------|-----------|-----------|
| H | 7.442312  | 6.879530  | -1.230988 |
| C | 2.708165  | 8.495818  | -0.214668 |
| H | 3.431706  | 8.522192  | -1.037490 |
| C | 5.151402  | 11.009368 | 7.926150  |
| H | 4.357927  | 11.267151 | 8.634868  |
| H | 6.074751  | 11.483641 | 8.269895  |
| H | 5.294324  | 9.925329  | 7.962267  |
| C | 9.485847  | 12.867342 | 4.037268  |
| H | 10.563951 | 13.063706 | 3.989006  |
| H | 8.979947  | 13.692254 | 3.520133  |
| C | 9.157730  | 9.058571  | 0.590977  |
| H | 8.683210  | 9.985539  | 0.943874  |
| H | 10.189702 | 9.071437  | 0.961040  |
| C | 0.087601  | 7.765591  | 0.895681  |
| H | -0.384985 | 7.286138  | 0.029659  |
| H | -0.637807 | 7.738686  | 1.719159  |
| C | 2.367009  | 7.037963  | 0.129570  |
| H | 3.279621  | 6.496476  | 0.410398  |
| H | 1.940036  | 6.537732  | -0.749390 |
| C | 9.133477  | 9.047805  | -0.938930 |
| H | 9.675056  | 8.163040  | -1.300572 |
| H | 9.654747  | 9.924357  | -1.338424 |
| C | 9.449132  | 10.329051 | 5.530553  |
| H | 9.973862  | 9.514953  | 6.042855  |
| C | 2.872403  | 5.426434  | 6.527364  |
| H | 2.426643  | 6.431047  | 6.505650  |
| H | 2.078415  | 4.736183  | 6.831026  |
| C | 5.340701  | 1.991552  | 1.130829  |
| H | 4.921345  | 1.901515  | 2.142544  |
| H | 6.424478  | 2.096040  | 1.248718  |
| C | 7.694973  | 8.998122  | -1.460166 |
| H | 7.686975  | 8.960448  | -2.554710 |



|   |           |           |           |
|---|-----------|-----------|-----------|
| H | 7.174401  | 9.921403  | -1.170109 |
| C | 4.271996  | 13.366783 | 6.145830  |
| H | 4.110686  | 13.704050 | 5.118210  |
| H | 5.085729  | 13.959987 | 6.571834  |
| H | 3.365596  | 13.579669 | 6.721794  |
| C | 3.254877  | 3.109041  | 0.261624  |
| H | 2.767773  | 3.061692  | 1.246050  |
| H | 2.865741  | 4.003665  | -0.238101 |
| C | 4.013066  | 5.408870  | 7.548199  |
| H | 4.393668  | 4.382439  | 7.639616  |
| H | 3.642858  | 5.699074  | 8.537123  |
| C | 9.764929  | 11.664469 | 6.220950  |
| H | 10.845639 | 11.852003 | 6.205427  |
| H | 9.456382  | 11.624906 | 7.273563  |
| C | 5.159400  | 6.323964  | 7.111473  |
| H | 5.984350  | 6.274512  | 7.829992  |
| H | 4.804423  | 7.366669  | 7.108302  |
| C | 3.487406  | 0.598447  | 0.132867  |
| H | 3.256605  | -0.292719 | -0.460227 |
| H | 3.008154  | 0.461881  | 1.112056  |
| C | 2.910862  | 1.848673  | -0.535008 |
| H | 1.825515  | 1.756177  | -0.648651 |
| H | 3.328500  | 1.938953  | -1.547202 |

4.log

SCF (M06-2X) = -2694.94794248

E(SCF)+ZPE(0 K)= -2693.762543

H(298 K)= -2693.711684

G(298 K)= -2693.843578

Lowest Frequency = -170.6268 cm<sup>-1</sup>

|    |           |           |           |
|----|-----------|-----------|-----------|
| Sn | 5.160233  | 9.006947  | 3.584742  |
| Si | 3.075442  | 9.197780  | 1.228254  |
| Si | 4.411874  | 11.783428 | 2.300874  |
| O  | 4.194631  | 10.438661 | 1.331128  |
| N  | 3.350658  | 8.380306  | 2.740699  |
| N  | 5.164426  | 11.065614 | 3.696521  |
| N  | 5.546358  | 8.196625  | 5.458512  |
| H  | 4.910935  | 8.260946  | 6.243188  |
| C  | 6.936070  | 7.833978  | 3.056781  |
| C  | 3.536778  | 8.229453  | -0.310488 |
| H  | 3.506143  | 8.888100  | -1.184631 |
| H  | 2.855139  | 7.393781  | -0.497319 |
| H  | 4.550330  | 7.825135  | -0.229696 |
| C  | 2.730311  | 7.082817  | 3.081573  |
| C  | 6.793473  | 6.688605  | 4.052806  |
| C  | 5.481739  | 11.771917 | 4.950810  |
| C  | 1.332628  | 6.967124  | 2.435871  |
| H  | 0.710856  | 7.806785  | 2.771996  |
| H  | 1.420414  | 7.035825  | 1.342634  |
| C  | 6.099222  | 6.924393  | 5.270751  |
| C  | 0.665601  | 5.627579  | 2.789948  |
| H  | -0.318708 | 5.584098  | 2.309398  |
| C  | 6.479417  | 4.627504  | 5.905307  |
| H  | 6.349379  | 3.812207  | 6.612212  |
| C  | 6.010980  | 7.022035  | 8.452596  |
| H  | 6.898529  | 6.447954  | 8.751713  |
| H  | 6.377646  | 7.913326  | 7.930998  |
| C  | 5.646102  | 13.284892 | 4.694901  |
| H  | 4.729237  | 13.694765 | 4.251527  |
| H  | 6.461073  | 13.433905 | 3.975095  |
| C  | 7.160931  | 8.590789  | 0.642182  |
| H  | 7.202310  | 8.237656  | -0.394269 |

|   |          |           |          |
|---|----------|-----------|----------|
| H | 6.288996 | 9.257819  | 0.709079 |
| C | 3.581637 | 5.895013  | 2.587745 |
| H | 3.713170 | 5.981701  | 1.500129 |
| H | 4.578564 | 5.945156  | 3.045262 |
| C | 5.937414 | 5.879205  | 6.203447 |
| C | 5.184336 | 6.145707  | 7.491132 |
| H | 4.269169 | 6.710258  | 7.235411 |
| C | 6.809319 | 11.277646 | 5.562822 |
| H | 7.612319 | 11.440364 | 4.831175 |
| H | 6.744186 | 10.201942 | 5.759944 |
| C | 7.299888 | 5.416953  | 3.802985 |
| H | 7.808349 | 5.228976  | 2.861203 |
| C | 6.987380 | 7.399083  | 1.589350 |
| H | 7.849747 | 6.731575  | 1.440260 |
| H | 6.093640 | 6.816995  | 1.330432 |
| C | 5.496706 | 12.947130 | 1.317379 |
| H | 6.491014 | 12.510685 | 1.179715 |
| H | 5.613748 | 13.923713 | 1.793608 |
| H | 5.057039 | 13.102413 | 0.327209 |
| C | 1.361059 | 9.923841  | 0.983766 |
| H | 0.935763 | 10.306486 | 1.914670 |
| H | 0.668384 | 9.183112  | 0.574884 |
| H | 1.419689 | 10.752257 | 0.269691 |
| C | 8.201609 | 8.654277  | 3.390808 |
| H | 8.174859 | 8.986312  | 4.434963 |
| H | 9.060395 | 7.969430  | 3.307606 |
| C | 8.411780 | 9.838385  | 2.443705 |
| H | 9.346971 | 10.352036 | 2.692938 |
| H | 7.602374 | 10.568427 | 2.588261 |
| C | 7.154231 | 4.367779  | 4.714996 |
| C | 4.352345 | 11.577302 | 5.983042 |
| H | 4.227867 | 10.501657 | 6.174022 |

|   |           |           |          |
|---|-----------|-----------|----------|
| H | 3.411458  | 11.938270 | 5.547084 |
| C | 8.426253  | 9.381680  | 0.983348 |
| H | 8.527515  | 10.243302 | 0.314904 |
| H | 9.303975  | 8.742798  | 0.815156 |
| C | 7.258688  | 13.516574 | 6.602187 |
| H | 7.485120  | 14.053596 | 7.531774 |
| H | 8.089224  | 13.697815 | 5.908855 |
| C | 4.698280  | 4.893748  | 8.228534 |
| H | 4.115736  | 4.259799  | 7.549147 |
| H | 5.564278  | 4.303299  | 8.557315 |
| C | 5.947176  | 14.038586 | 6.000925 |
| H | 6.039937  | 15.108139 | 5.779947 |
| C | 0.503530  | 5.517589  | 4.312339 |
| H | 0.019476  | 4.567256  | 4.569497 |
| H | -0.142329 | 6.324327  | 4.681129 |
| C | 7.120752  | 12.013554 | 6.875396 |
| H | 8.057837  | 11.624471 | 7.289476 |
| C | 1.541256  | 4.472160  | 2.283155 |
| H | 1.642209  | 4.528225  | 1.191561 |
| H | 1.065010  | 3.511988  | 2.517421 |
| C | 2.539709  | 6.946209  | 4.604449 |
| H | 1.935152  | 7.791620  | 4.959841 |
| H | 3.515461  | 7.002543  | 5.092331 |
| C | 2.924469  | 4.553225  | 2.944101 |
| H | 3.558731  | 3.735245  | 2.583268 |
| C | 4.802928  | 13.815093 | 7.000768 |
| H | 3.862598  | 14.205778 | 6.591401 |
| H | 5.006879  | 14.362897 | 7.929001 |
| C | 7.645083  | 2.973506  | 4.392061 |
| H | 7.545123  | 2.366409  | 5.304718 |
| C | 6.770525  | 2.316409  | 3.309590 |
| H | 6.822241  | 2.929864  | 2.398437 |

|   |           |           |           |
|---|-----------|-----------|-----------|
| H | 5.723978  | 2.326965  | 3.635904  |
| C | 2.774756  | 4.456510  | 4.469870  |
| H | 3.764919  | 4.512447  | 4.941816  |
| H | 2.329005  | 3.491820  | 4.744483  |
| C | 5.200902  | 7.408941  | 9.691142  |
| H | 5.810940  | 8.012938  | 10.371017 |
| H | 4.353922  | 8.038984  | 9.383199  |
| C | 3.868564  | 5.275586  | 9.457114  |
| H | 2.967048  | 5.811842  | 9.129562  |
| H | 3.527644  | 4.374099  | 9.976558  |
| C | 5.978715  | 11.775961 | 7.875750  |
| H | 5.883360  | 10.702197 | 8.085492  |
| H | 6.201381  | 12.276056 | 8.826514  |
| C | 1.886035  | 5.606225  | 4.971037  |
| H | 1.785028  | 5.544031  | 6.062208  |
| C | 4.662807  | 12.313697 | 7.293216  |
| H | 3.847096  | 12.151181 | 8.007180  |
| C | 2.736846  | 12.563515 | 2.642043  |
| H | 2.210341  | 12.769449 | 1.704389  |
| H | 2.815803  | 13.506953 | 3.189860  |
| H | 2.118110  | 11.883637 | 3.236165  |
| C | 9.578634  | 1.500302  | 3.674621  |
| H | 9.512120  | 0.899646  | 4.592152  |
| H | 10.630222 | 1.494603  | 3.369306  |
| C | 8.704757  | 0.860489  | 2.593589  |
| H | 8.832688  | 1.415908  | 1.654302  |
| H | 9.027109  | -0.167975 | 2.400135  |
| C | 9.123421  | 2.929939  | 3.976708  |
| H | 9.739584  | 3.377591  | 4.763707  |
| H | 9.264636  | 3.544835  | 3.077354  |
| C | 4.667993  | 6.167708  | 10.410479 |
| H | 5.517037  | 5.594244  | 10.806556 |

|   |          |          |           |
|---|----------|----------|-----------|
| H | 4.052597 | 6.456429 | 11.268846 |
| C | 7.228515 | 0.890867 | 2.995174  |
| H | 7.087082 | 0.264298 | 3.886506  |
| H | 6.607113 | 0.458601 | 2.203789  |

5.log

SCF (M06-2X) = -2882.10313299

E(SCF)+ZPE(0 K)= -2880.926677

H(298 K)= -2880.873854

G(298 K)= -2881.011467

Lowest Frequency = -166.1643 cm<sup>-1</sup>

|    |           |           |           |
|----|-----------|-----------|-----------|
| Sn | 12.849436 | 11.905155 | 16.569296 |
| Si | 12.055770 | 14.461588 | 15.126236 |
| Si | 14.062229 | 14.493505 | 17.566623 |
| O  | 12.508506 | 9.893395  | 16.640607 |
| O  | 13.951552 | 8.445570  | 15.635238 |
| N  | 13.443647 | 12.982104 | 18.179730 |
| N  | 14.292188 | 10.763140 | 15.630032 |
| O  | 13.508319 | 14.353050 | 15.979889 |
| C  | 16.792117 | 11.245832 | 12.929685 |
| H  | 16.834421 | 11.387970 | 11.853670 |
| C  | 12.515624 | 14.627477 | 13.326724 |
| H  | 13.200559 | 13.817085 | 13.058074 |
| H  | 13.020276 | 15.578689 | 13.132390 |
| H  | 11.644235 | 14.564458 | 12.667547 |
| N  | 11.404702 | 12.908165 | 15.564117 |
| C  | 10.181273 | 12.240628 | 15.107553 |
| C  | 17.987718 | 11.255229 | 13.642365 |
| C  | 13.236796 | 10.519861 | 21.101690 |
| H  | 13.187469 | 9.425662  | 21.113528 |

|   |           |           |           |
|---|-----------|-----------|-----------|
| C | 13.290296 | 11.002103 | 19.645874 |
| H | 14.158435 | 10.571144 | 19.128230 |
| H | 12.392278 | 10.650866 | 19.115546 |
| C | 16.718603 | 9.058945  | 17.427708 |
| H | 15.874097 | 8.608949  | 16.900125 |
| H | 17.630128 | 8.641349  | 16.975540 |
| C | 13.959009 | 9.530178  | 12.395579 |
| H | 14.789319 | 9.137559  | 11.790659 |
| H | 13.921832 | 8.928964  | 13.308811 |
| C | 17.942724 | 11.065296 | 15.019635 |
| H | 18.879568 | 11.066046 | 15.568408 |
| C | 16.745491 | 10.584641 | 17.194332 |
| H | 15.827907 | 11.014914 | 17.625741 |
| C | 15.561740 | 11.065411 | 13.560999 |
| C | 16.739781 | 10.874429 | 15.702279 |
| C | 13.367212 | 12.535694 | 19.573931 |
| C | 15.921271 | 14.549578 | 17.433520 |
| H | 16.260227 | 13.693275 | 16.838400 |
| H | 16.407410 | 14.498054 | 18.412112 |
| H | 16.255080 | 15.462361 | 16.931073 |
| C | 15.538478 | 10.880945 | 14.959598 |
| C | 14.617322 | 12.999328 | 20.342039 |
| H | 14.674421 | 14.097829 | 20.317725 |
| H | 15.505194 | 12.615146 | 19.826560 |
| C | 13.631857 | 9.572464  | 15.930772 |
| C | 10.493282 | 11.236831 | 13.985064 |
| H | 11.213769 | 10.495085 | 14.361036 |
| H | 10.979100 | 11.776277 | 13.160458 |
| C | 17.893368 | 10.849374 | 19.442835 |
| H | 18.755393 | 11.293009 | 19.952479 |
| H | 16.998241 | 11.295102 | 19.894857 |
| C | 12.650725 | 9.410872  | 11.610523 |

|   |           |           |           |
|---|-----------|-----------|-----------|
| H | 12.475427 | 8.365309  | 11.336348 |
| H | 11.817630 | 9.707209  | 12.260108 |
| C | 14.568731 | 12.525805 | 21.801775 |
| H | 15.470687 | 12.867389 | 22.322259 |
| C | 14.497340 | 10.992060 | 21.840038 |
| H | 15.391007 | 10.558349 | 21.372740 |
| H | 14.474184 | 10.645126 | 22.880250 |
| C | 7.246680  | 11.833451 | 15.265554 |
| H | 6.322024  | 11.346512 | 14.932541 |
| H | 6.975991  | 12.538179 | 16.061775 |
| C | 19.774984 | 10.045066 | 12.361956 |
| H | 18.944986 | 9.607749  | 11.791786 |
| H | 19.988691 | 9.360510  | 13.189050 |
| C | 14.287931 | 10.997442 | 12.741077 |
| H | 13.462621 | 11.383745 | 13.359188 |
| C | 17.856810 | 9.336970  | 19.668035 |
| H | 17.794757 | 9.112756  | 20.738884 |
| H | 18.796204 | 8.897739  | 19.305396 |
| C | 17.937951 | 11.189374 | 17.950988 |
| H | 17.976694 | 12.274849 | 17.800279 |
| H | 18.873020 | 10.778663 | 17.549448 |
| C | 11.056570 | 15.927359 | 15.718834 |
| H | 10.625194 | 15.737395 | 16.705520 |
| H | 10.235940 | 16.144127 | 15.028552 |
| H | 11.684677 | 16.821737 | 15.780718 |
| C | 11.990842 | 11.107901 | 21.781304 |
| H | 11.934122 | 10.764241 | 22.821325 |
| H | 11.084941 | 10.756752 | 21.272092 |
| C | 8.234990  | 11.593240 | 12.972063 |
| H | 7.319320  | 11.109745 | 12.610497 |
| H | 8.681151  | 12.123991 | 12.121253 |
| C | 19.315122 | 11.400931 | 12.925124 |



|   |           |           |           |
|---|-----------|-----------|-----------|
| H | 20.055721 | 11.730370 | 13.669834 |
| C | 9.513623  | 11.484370 | 16.273567 |
| H | 9.296614  | 12.200417 | 17.077568 |
| H | 10.210417 | 10.729028 | 16.664886 |
| C | 12.648790 | 10.294885 | 10.361397 |
| H | 13.397211 | 9.916340  | 9.651721  |
| H | 11.678162 | 10.240867 | 9.856342  |
| C | 12.991691 | 11.746335 | 10.706726 |
| H | 13.028747 | 12.356148 | 9.797654  |
| H | 12.198773 | 12.170966 | 11.338640 |
| C | 12.121027 | 13.111213 | 20.274940 |
| H | 11.226664 | 12.789284 | 19.723638 |
| H | 12.155189 | 14.207182 | 20.225975 |
| C | 16.685775 | 8.704321  | 18.915363 |
| H | 15.741545 | 9.059471  | 19.352922 |
| H | 16.693083 | 7.616501  | 19.038669 |
| C | 8.579170  | 9.786787  | 14.684340 |
| H | 7.672327  | 9.266166  | 14.353019 |
| H | 9.275275  | 9.028834  | 15.062762 |
| C | 13.369882 | 16.023402 | 18.389876 |
| H | 13.649845 | 16.916168 | 17.821418 |
| H | 13.764588 | 16.142403 | 19.403892 |
| H | 12.279608 | 15.984744 | 18.455162 |
| C | 19.260582 | 12.437671 | 11.826024 |
| H | 18.713887 | 13.351875 | 12.049882 |
| C | 13.320945 | 13.115451 | 22.478237 |
| H | 13.279408 | 12.799682 | 23.527739 |
| H | 13.372499 | 14.211732 | 22.470013 |
| C | 8.230453  | 10.783579 | 15.801171 |
| H | 7.779626  | 10.249594 | 16.644925 |
| C | 7.891340  | 12.586785 | 14.092556 |
| H | 7.197562  | 13.346252 | 13.714534 |

|   |           |           |           |
|---|-----------|-----------|-----------|
| C | 14.328066 | 11.822926 | 11.447238 |
| H | 14.605809 | 12.862155 | 11.659280 |
| H | 15.102920 | 11.422874 | 10.780598 |
| C | 9.175418  | 13.278728 | 14.578216 |
| H | 8.943618  | 13.994629 | 15.377596 |
| H | 9.627078  | 13.838858 | 13.746254 |
| C | 12.059447 | 12.642120 | 21.738146 |
| H | 11.170132 | 13.065722 | 22.218432 |
| C | 20.620621 | 11.066411 | 10.231217 |
| H | 20.040212 | 10.467684 | 9.515341  |
| H | 21.524299 | 11.379510 | 9.695921  |
| C | 19.822189 | 12.281287 | 10.626860 |
| H | 19.716089 | 13.070082 | 9.884965  |
| C | 9.215133  | 10.537407 | 13.503874 |
| H | 9.465341  | 9.828536  | 12.705885 |
| C | 20.987363 | 10.215529 | 11.448558 |
| H | 21.790905 | 10.711769 | 12.007155 |
| H | 21.371591 | 9.241669  | 11.130126 |

6.log

SCF (M06-2X) = -3561.68188406

E(SCF)+ZPE(0 K)= -3560.405706

H(298 K)= -3560.345784

G(298 K)= -3560.497760

Lowest Frequency = -176.8582 cm<sup>-1</sup>

|    |          |          |          |
|----|----------|----------|----------|
| Sn | 5.783124 | 6.821843 | 1.258884 |
| Si | 5.220793 | 9.772819 | 1.843521 |
| Si | 3.017876 | 7.553466 | 2.353507 |
| O  | 7.077002 | 5.374480 | 0.835297 |
| O  | 3.922073 | 8.744215 | 1.598309 |

|   |           |           |           |
|---|-----------|-----------|-----------|
| N | 4.210696  | 6.288156  | 2.437689  |
| N | 6.521147  | 8.613882  | 1.888947  |
| C | 4.027561  | 4.901422  | 2.877718  |
| C | 3.720037  | 3.968108  | 1.688638  |
| H | 2.836914  | 4.347583  | 1.154842  |
| H | 4.572725  | 4.004013  | 0.992365  |
| C | 7.904902  | 8.871904  | 2.311416  |
| C | 2.867380  | 4.817639  | 3.887424  |
| H | 1.940644  | 5.178651  | 3.417819  |
| H | 3.088313  | 5.477133  | 4.736504  |
| C | 2.421002  | 8.186010  | 4.011961  |
| H | 3.247307  | 8.238110  | 4.726662  |
| H | 1.644269  | 7.545163  | 4.438580  |
| H | 2.001840  | 9.191006  | 3.898012  |
| C | 3.505206  | 2.523432  | 2.163779  |
| H | 3.273703  | 1.882544  | 1.303257  |
| C | 5.260404  | 10.889390 | 0.347121  |
| H | 6.102674  | 11.586642 | 0.362248  |
| H | 4.335468  | 11.467565 | 0.261766  |
| H | 5.351703  | 10.260904 | -0.544482 |
| C | 5.109722  | 2.932596  | 4.049566  |
| H | 6.030160  | 2.586871  | 4.533224  |
| C | 5.301900  | 4.381389  | 3.572981  |
| H | 6.143847  | 4.429573  | 2.867759  |
| H | 5.530024  | 5.041073  | 4.420644  |
| C | 10.300519 | 8.046041  | 2.262385  |
| H | 10.947888 | 7.238774  | 1.901744  |
| C | 2.662452  | 3.373263  | 4.367727  |
| H | 1.830519  | 3.346981  | 5.080892  |
| C | 2.339142  | 2.479356  | 3.161609  |
| H | 2.169229  | 1.448052  | 3.494539  |
| H | 1.416182  | 2.821650  | 2.675834  |

|   |           |           |          |
|---|-----------|-----------|----------|
| C | 4.789899  | 2.030925  | 2.846068 |
| H | 5.621489  | 2.047938  | 2.130392 |
| H | 4.664849  | 0.993156  | 3.179693 |
| C | 3.945426  | 2.875537  | 5.049188 |
| H | 3.804209  | 1.847709  | 5.405950 |
| H | 4.169875  | 3.497304  | 5.924770 |
| C | 8.854005  | 7.756865  | 1.835784 |
| H | 8.788580  | 7.659681  | 0.743568 |
| H | 8.533934  | 6.792523  | 2.252449 |
| C | 4.969819  | 10.761864 | 3.414785 |
| H | 4.923081  | 10.111935 | 4.292918 |
| H | 4.029542  | 11.319384 | 3.350316 |
| H | 5.773697  | 11.487924 | 3.573176 |
| C | 10.372260 | 8.120793  | 3.794501 |
| H | 11.403764 | 8.315207  | 4.113973 |
| H | 10.070503 | 7.160441  | 4.230123 |
| C | 1.590415  | 7.182436  | 1.204974 |
| H | 0.939633  | 8.054902  | 1.092857 |
| H | 0.977273  | 6.345822  | 1.553896 |
| H | 1.990767  | 6.926026  | 0.218718 |
| C | 8.397576  | 10.209785 | 1.723655 |
| H | 7.742385  | 11.023305 | 2.068694 |
| H | 8.317429  | 10.165259 | 0.629170 |
| C | 9.839994  | 10.505374 | 2.159226 |
| H | 10.158222 | 11.462607 | 1.730319 |
| C | 9.446624  | 9.239389  | 4.293262 |
| H | 9.486805  | 9.293688  | 5.387356 |
| C | 8.004379  | 8.947189  | 3.849680 |
| H | 7.652022  | 7.994710  | 4.268089 |
| H | 7.332098  | 9.730947  | 4.218654 |
| C | 10.758628 | 9.381416  | 1.660524 |
| H | 11.796941 | 9.588062  | 1.948487 |

|    |           |           |           |
|----|-----------|-----------|-----------|
| H  | 10.727933 | 9.329821  | 0.563988  |
| C  | 9.900854  | 10.579131 | 3.693001  |
| H  | 10.923807 | 10.807743 | 4.016803  |
| H  | 9.255962  | 11.390641 | 4.054225  |
| Sn | 6.785202  | 5.449495  | -1.159451 |
| Si | 7.804163  | 2.631924  | -1.641679 |
| Si | 9.677631  | 5.162072  | -2.117836 |
| O  | 5.395016  | 6.801809  | -0.724222 |
| O  | 8.929931  | 3.846619  | -1.398337 |
| N  | 8.316728  | 6.231918  | -2.252643 |
| N  | 6.366887  | 3.591990  | -1.882341 |
| C  | 8.200520  | 7.552691  | -2.876672 |
| C  | 8.178344  | 8.677489  | -1.822111 |
| H  | 9.111189  | 8.626293  | -1.242711 |
| H  | 7.345221  | 8.503530  | -1.125001 |
| C  | 5.046580  | 3.131756  | -2.323724 |
| C  | 9.386935  | 7.804419  | -3.825578 |
| H  | 10.328541 | 7.742811  | -3.259462 |
| H  | 9.406342  | 7.019147  | -4.591657 |
| C  | 10.451040 | 4.609349  | -3.731456 |
| H  | 9.681111  | 4.407472  | -4.482172 |
| H  | 11.138842 | 5.354800  | -4.139743 |
| H  | 11.016327 | 3.686386  | -3.565241 |
| C  | 8.038746  | 10.053833 | -2.489045 |
| H  | 8.011510  | 10.832901 | -1.716433 |
| C  | 7.809575  | 1.664921  | -0.043468 |
| H  | 7.038628  | 0.890355  | -0.006955 |
| H  | 8.781722  | 1.192746  | 0.127765  |
| H  | 7.628583  | 2.375212  | 0.770883  |
| C  | 6.772992  | 9.006621  | -4.388344 |
| H  | 5.845105  | 9.036061  | -4.970669 |
| C  | 6.902173  | 7.636493  | -3.706502 |

|   |           |           |           |
|---|-----------|-----------|-----------|
| H | 6.041100  | 7.482494  | -3.039167 |
| H | 6.911497  | 6.826983  | -4.448787 |
| C | 2.602479  | 3.761516  | -2.566476 |
| H | 1.880363  | 4.568229  | -2.397575 |
| C | 9.270672  | 9.183875  | -4.492899 |
| H | 10.133051 | 9.336351  | -5.152123 |
| C | 9.240531  | 10.281381 | -3.418239 |
| H | 9.170405  | 11.267080 | -3.894715 |
| H | 10.171802 | 10.264936 | -2.837484 |
| C | 6.741165  | 10.100074 | -3.310546 |
| H | 5.874894  | 9.946299  | -2.656774 |
| H | 6.629454  | 11.086579 | -3.777681 |
| C | 7.974940  | 9.235379  | -5.315661 |
| H | 7.886104  | 10.209153 | -5.813117 |
| H | 7.997991  | 8.468605  | -6.100117 |
| C | 3.992092  | 4.233621  | -2.119447 |
| H | 3.961990  | 4.533582  | -1.065004 |
| H | 4.284435  | 5.126263  | -2.693481 |
| C | 8.299406  | 1.563988  | -3.097125 |
| H | 8.286598  | 2.132441  | -4.031137 |
| H | 9.313356  | 1.182281  | -2.939219 |
| H | 7.636047  | 0.700942  | -3.213363 |
| C | 2.642239  | 3.399764  | -4.057988 |
| H | 1.651515  | 3.066248  | -4.391049 |
| H | 2.905764  | 4.284284  | -4.650835 |
| C | 10.957914 | 5.759622  | -0.894715 |
| H | 11.813465 | 5.082190  | -0.819815 |
| H | 11.330636 | 6.758633  | -1.144607 |
| H | 10.474078 | 5.813579  | 0.086575  |
| C | 4.613967  | 1.883446  | -1.530726 |
| H | 5.347307  | 1.080251  | -1.696186 |
| H | 4.631142  | 2.122513  | -0.459093 |

|   |          |          |           |
|---|----------|----------|-----------|
| C | 3.224656 | 1.404445 | -1.974883 |
| H | 2.940786 | 0.520542 | -1.391330 |
| C | 3.675981 | 2.287059 | -4.283309 |
| H | 3.716529 | 2.030167 | -5.348134 |
| C | 5.061017 | 2.772550 | -3.824187 |
| H | 5.374241 | 3.658493 | -4.391838 |
| H | 5.808785 | 1.991103 | -4.003792 |
| C | 2.201481 | 2.526484 | -1.746093 |
| H | 1.200588 | 2.187955 | -2.041228 |
| H | 2.158924 | 2.783647 | -0.679279 |
| C | 3.271681 | 1.047681 | -3.469102 |
| H | 2.290180 | 0.686220 | -3.800098 |
| H | 3.991097 | 0.236115 | -3.637265 |

7.log

SCF (M06-2X) = -4207.58242154

E(SCF)+ZPE(0 K)= -4206.308722

H(298 K)= -4206.248625

G(298 K)= -4206.399595

Lowest Frequency = -185.9090 cm<sup>-1</sup>

|    |          |          |          |
|----|----------|----------|----------|
| Sn | 5.767025 | 7.059689 | 1.386744 |
| Si | 4.659540 | 9.716259 | 2.514808 |
| Si | 2.794000 | 7.250921 | 2.162625 |
| O  | 3.581200 | 8.675012 | 1.762459 |
| N  | 4.184355 | 6.226812 | 2.407975 |
| N  | 6.162134 | 8.888502 | 2.205253 |
| C  | 4.227512 | 4.863381 | 2.956503 |
| C  | 4.345445 | 3.792290 | 1.850911 |
| H  | 3.468881 | 3.883021 | 1.193172 |
| H  | 5.236219 | 3.977583 | 1.236258 |

|   |           |           |          |
|---|-----------|-----------|----------|
| C | 7.539557  | 9.346540  | 2.425777 |
| C | 2.936847  | 4.566142  | 3.747227 |
| H | 2.068076  | 4.657634  | 3.078278 |
| H | 2.823658  | 5.309320  | 4.545483 |
| C | 1.684685  | 7.562204  | 3.641166 |
| H | 2.248713  | 7.672115  | 4.570580 |
| H | 0.948278  | 6.765969  | 3.777622 |
| H | 1.138156  | 8.495247  | 3.464964 |
| C | 4.413319  | 2.382872  | 2.458954 |
| H | 4.527474  | 1.644034  | 1.655920 |
| C | 4.449806  | 11.375794 | 1.680542 |
| H | 4.912099  | 12.193768 | 2.238851 |
| H | 3.380312  | 11.589595 | 1.589260 |
| H | 4.875993  | 11.354077 | 0.673442 |
| C | 5.460740  | 3.315018  | 4.544149 |
| H | 6.316935  | 3.245014  | 5.224425 |
| C | 5.409487  | 4.724415  | 3.937592 |
| H | 6.351787  | 4.923505  | 3.411458 |
| H | 5.296843  | 5.487224  | 4.719375 |
| C | 9.796990  | 9.750238  | 1.340904 |
| H | 10.347660 | 9.683474  | 0.394054 |
| C | 2.969814  | 3.153348  | 4.352875 |
| H | 2.035732  | 2.980473  | 4.899768 |
| C | 3.117419  | 2.111117  | 3.234936 |
| H | 3.135877  | 1.102305  | 3.665617 |
| H | 2.256754  | 2.160550  | 2.555163 |
| C | 5.615464  | 2.289326  | 3.411320 |
| H | 6.545726  | 2.483112  | 2.863817 |
| H | 5.683533  | 1.276120  | 3.826761 |
| C | 4.161620  | 3.042015  | 5.314139 |
| H | 4.189832  | 2.039906  | 5.759672 |
| H | 4.051736  | 3.761777  | 6.134864 |



|    |           |           |           |
|----|-----------|-----------|-----------|
| C  | 8.351886  | 9.284595  | 1.117243  |
| H  | 7.846592  | 9.900034  | 0.359241  |
| H  | 8.366413  | 8.252341  | 0.747565  |
| C  | 4.242826  | 9.823583  | 4.340186  |
| H  | 4.382227  | 8.844166  | 4.809486  |
| H  | 3.205952  | 10.138372 | 4.496196  |
| H  | 4.889324  | 10.537029 | 4.860086  |
| C  | 10.459479 | 8.842580  | 2.389233  |
| H  | 11.502062 | 9.146992  | 2.544475  |
| H  | 10.468023 | 7.805398  | 2.030474  |
| C  | 1.773317  | 6.756098  | 0.675626  |
| H  | 0.925952  | 7.429867  | 0.517393  |
| H  | 1.382846  | 5.737827  | 0.786904  |
| H  | 2.406488  | 6.780760  | -0.218252 |
| C  | 7.561614  | 10.806818 | 2.916651  |
| H  | 6.981442  | 10.892307 | 3.846285  |
| H  | 7.088626  | 11.446725 | 2.162323  |
| C  | 9.005044  | 11.280498 | 3.157896  |
| H  | 8.983488  | 12.317063 | 3.513434  |
| C  | 9.684348  | 8.932427  | 3.713719  |
| H  | 10.158237 | 8.287966  | 4.462693  |
| C  | 8.237206  | 8.472217  | 3.487161  |
| H  | 8.231345  | 7.424667  | 3.154020  |
| H  | 7.656144  | 8.524319  | 4.417553  |
| C  | 9.792693  | 11.200982 | 1.841463  |
| H  | 10.820411 | 11.550656 | 1.999809  |
| H  | 9.336217  | 11.856613 | 1.089060  |
| C  | 9.676749  | 10.385796 | 4.209435  |
| H  | 10.702960 | 10.729132 | 4.389747  |
| H  | 9.137464  | 10.454566 | 5.162581  |
| Sn | 6.853749  | 5.498799  | -1.410222 |
| Si | 7.361897  | 2.480366  | -1.683863 |

|    |           |           |           |
|----|-----------|-----------|-----------|
| Si | 9.617273  | 4.577505  | -2.401378 |
| O  | 8.685980  | 3.488522  | -1.538904 |
| N  | 8.443589  | 5.844358  | -2.658535 |
| N  | 6.083056  | 3.657342  | -1.881787 |
| C  | 8.711474  | 7.173067  | -3.226234 |
| C  | 8.972465  | 8.213350  | -2.119748 |
| H  | 9.815690  | 7.871889  | -1.501562 |
| H  | 8.090058  | 8.266383  | -1.471207 |
| C  | 4.709522  | 3.324590  | -2.299323 |
| C  | 9.945747  | 7.124735  | -4.149581 |
| H  | 10.824515 | 6.791389  | -3.580013 |
| H  | 9.767994  | 6.393268  | -4.948354 |
| C  | 10.239270 | 3.762328  | -3.968643 |
| H  | 9.434929  | 3.668059  | -4.703785 |
| H  | 11.054438 | 4.328178  | -4.428069 |
| H  | 10.614580 | 2.759630  | -3.739293 |
| C  | 9.249152  | 9.598847  | -2.718228 |
| H  | 9.423872  | 10.317148 | -1.906920 |
| C  | 7.283142  | 1.544976  | -0.068679 |
| H  | 6.462020  | 0.824150  | -0.028796 |
| H  | 8.220925  | 1.011143  | 0.112959  |
| H  | 7.146260  | 2.270714  | 0.740297  |
| C  | 7.785083  | 9.032231  | -4.679832 |
| H  | 6.914920  | 9.345367  | -5.267650 |
| C  | 7.518140  | 7.642633  | -4.082094 |
| H  | 6.613269  | 7.685894  | -3.462523 |
| H  | 7.345611  | 6.901315  | -4.872970 |
| C  | 2.286559  | 4.076525  | -2.370340 |
| H  | 1.618050  | 4.902448  | -2.101150 |
| C  | 10.232669 | 8.510544  | -4.751535 |
| H  | 11.118752 | 8.442682  | -5.393171 |
| C  | 10.487272 | 9.521167  | -3.622976 |

|   |           |           |           |
|---|-----------|-----------|-----------|
| H | 10.707762 | 10.507546 | -4.049543 |
| H | 11.362654 | 9.216621  | -3.035009 |
| C | 8.029134  | 10.037996 | -3.543415 |
| H | 7.144138  | 10.093213 | -2.896906 |
| H | 8.197375  | 11.038809 | -3.960442 |
| C | 9.024812  | 8.965899  | -5.582452 |
| H | 9.224355  | 9.950354  | -6.023650 |
| H | 8.851658  | 8.266054  | -6.409446 |
| C | 3.718516  | 4.448456  | -1.961388 |
| H | 3.766173  | 4.674040  | -0.887619 |
| H | 4.009997  | 5.363513  | -2.491581 |
| C | 7.618661  | 1.319034  | -3.132126 |
| H | 7.705919  | 1.871087  | -4.072144 |
| H | 8.547094  | 0.758610  | -2.978831 |
| H | 6.807477  | 0.592214  | -3.238282 |
| C | 2.242477  | 3.841807  | -3.887231 |
| H | 1.223352  | 3.581581  | -4.199281 |
| H | 2.521504  | 4.761326  | -4.416182 |
| C | 11.023446 | 5.036829  | -1.257493 |
| H | 11.631338 | 4.155792  | -1.029104 |
| H | 11.683149 | 5.804168  | -1.672609 |
| H | 10.606937 | 5.413688  | -0.317314 |
| C | 4.239064  | 2.041499  | -1.582931 |
| H | 4.918421  | 1.212509  | -1.827720 |
| H | 4.296476  | 2.204666  | -0.498917 |
| C | 2.814072  | 1.658668  | -2.006335 |
| H | 2.517834  | 0.741427  | -1.484288 |
| C | 3.211054  | 2.707957  | -4.253032 |
| H | 3.192219  | 2.540002  | -5.336067 |
| C | 4.638004  | 3.088003  | -3.823060 |
| H | 4.968793  | 4.002385  | -4.333690 |
| H | 5.337257  | 2.291393  | -4.101644 |

|   |          |          |           |
|---|----------|----------|-----------|
| C | 1.854958 | 2.798705 | -1.638956 |
| H | 0.827479 | 2.533023 | -1.916929 |
| H | 1.867735 | 2.963234 | -0.552923 |
| C | 2.784165 | 1.424130 | -3.524410 |
| H | 1.774729 | 1.131944 | -3.839187 |
| H | 3.459029 | 0.599645 | -3.788555 |
| S | 5.320178 | 7.346655 | -1.031228 |
| S | 7.595024 | 5.509160 | 0.970677  |

**co2.log**

SCF (M06-2X) = -188.371533571

E(SCF)+ZPE(0 K)= -188.359587

H(298 K)= -188.356045

G(298 K)= -188.380274

Lowest Frequency = 694.7538 cm<sup>-1</sup>

|   |           |          |          |
|---|-----------|----------|----------|
| C | 0.234483  | 1.165517 | 0.000000 |
| O | 1.397336  | 1.165517 | 0.000000 |
| O | -0.928370 | 1.165517 | 0.000000 |

**cs2.log**

SCF (M06-2X) = -834.162742185

E(SCF)+ZPE(0 K)= -834.155647

H(298 K)= -834.151640

G(298 K)= -834.178545

Lowest Frequency = 416.9051 cm<sup>-1</sup>

|   |           |          |          |
|---|-----------|----------|----------|
| C | 0.234483  | 1.165517 | 0.000000 |
| S | 1.788861  | 1.165517 | 0.000000 |
| S | -1.319895 | 1.165517 | 0.000000 |

**TCHP\_CO2.log**

SCF (M06-2X) = -1102.46745722

E(SCF)+ZPE(0 K)= -1101.907684

H(298 K)= -1101.884005

G(298 K)= -1101.959142

Lowest Frequency = -53.5775 cm<sup>-1</sup>

|   |          |          |           |
|---|----------|----------|-----------|
| N | 5.925868 | 8.064660 | 3.379827  |
| C | 5.663631 | 6.899849 | 2.645009  |
| C | 4.917841 | 5.893869 | 3.282744  |
| C | 4.470474 | 6.089979 | 4.716230  |
| H | 4.184470 | 7.145613 | 4.825712  |
| C | 6.119596 | 6.764458 | 1.322082  |
| C | 5.816859 | 5.577826 | 0.653929  |
| H | 6.151601 | 5.446892 | -0.370794 |
| C | 6.934102 | 7.865085 | 0.677153  |
| H | 6.493440 | 8.828911 | 0.975654  |
| C | 5.087976 | 4.552926 | 1.253439  |
| C | 5.634119 | 5.834311 | 5.693194  |
| H | 5.939212 | 4.782690 | 5.598369  |
| H | 6.496860 | 6.445612 | 5.409999  |
| C | 4.773112 | 3.281763 | 0.495600  |
| H | 5.224634 | 3.369759 | -0.503818 |
| C | 4.647182 | 4.731342 | 2.566572  |
| H | 4.069440 | 3.943555 | 3.040538  |
| C | 8.393019 | 7.846426 | 1.177195  |
| H | 8.429548 | 7.824938 | 2.271857  |
| H | 8.854417 | 6.910197 | 0.834103  |
| C | 5.080041 | 0.768341 | 0.372976  |
| H | 5.565161 | 0.834111 | -0.610465 |

|   |           |           |           |
|---|-----------|-----------|-----------|
| H | 5.508917  | -0.102945 | 0.878585  |
| C | 3.260747  | 5.241106  | 5.122407  |
| H | 3.524181  | 4.175751  | 5.071010  |
| H | 2.433834  | 5.401324  | 4.421499  |
| C | 6.926927  | 7.854874  | -0.855973 |
| H | 5.896787  | 7.838403  | -1.228474 |
| H | 7.416774  | 6.941557  | -1.219593 |
| C | 9.173761  | 9.046450  | 0.638611  |
| H | 8.734068  | 9.965390  | 1.048844  |
| H | 10.210456 | 9.008514  | 0.988050  |
| C | 9.127845  | 9.092227  | -0.890418 |
| H | 9.664154  | 8.220970  | -1.290584 |
| H | 9.647551  | 9.981552  | -1.261012 |
| C | 2.831159  | 5.560283  | 6.556298  |
| H | 2.515986  | 6.610753  | 6.613935  |
| H | 1.963006  | 4.953351  | 6.832986  |
| C | 5.384151  | 2.040607  | 1.166895  |
| H | 4.969316  | 1.942881  | 2.179708  |
| H | 6.464510  | 2.179173  | 1.281462  |
| C | 7.686101  | 9.066160  | -1.404117 |
| H | 7.672292  | 9.053577  | -2.498696 |
| H | 7.172555  | 9.984912  | -1.090780 |
| C | 3.260095  | 3.087749  | 0.299880  |
| H | 2.779279  | 3.023334  | 1.285867  |
| H | 2.838736  | 3.967241  | -0.198557 |
| C | 3.981938  | 5.323276  | 7.537003  |
| H | 4.234060  | 4.254008  | 7.539216  |
| H | 3.673911  | 5.578238  | 8.556232  |
| C | 5.220206  | 6.128084  | 7.136705  |
| H | 6.050816  | 5.915402  | 7.817649  |
| H | 4.999350  | 7.199865  | 7.231191  |
| C | 3.573512  | 0.585991  | 0.176980  |

|   |          |           |           |
|---|----------|-----------|-----------|
| H | 3.371316 | -0.313288 | -0.413809 |
| H | 3.099822 | 0.435956  | 1.156787  |
| C | 2.956310 | 1.815108  | -0.493404 |
| H | 1.874342 | 1.688790  | -0.603446 |
| H | 3.367910 | 1.916557  | -1.506861 |
| C | 6.504469 | 9.116055  | 3.361007  |
| O | 7.033468 | 10.161554 | 3.453002  |

### TCHP\_CS2.log

SCF (M06-2X) = -1425.37352488

E(SCF)+ZPE(0 K)= -1424.816405

H(298 K)= -1424.792130

G(298 K)= -1424.870113

Lowest Frequency = -53.7001 cm<sup>-1</sup>

|   |          |          |           |
|---|----------|----------|-----------|
| N | 5.940858 | 8.047301 | 3.307555  |
| C | 5.658282 | 6.880653 | 2.614911  |
| C | 4.914290 | 5.879876 | 3.264522  |
| C | 4.477536 | 6.087461 | 4.698965  |
| H | 4.179089 | 7.141301 | 4.799814  |
| C | 6.115060 | 6.748993 | 1.290944  |
| C | 5.809540 | 5.561797 | 0.627740  |
| H | 6.140591 | 5.427023 | -0.397556 |
| C | 6.927913 | 7.857626 | 0.658251  |
| H | 6.484910 | 8.814554 | 0.972598  |
| C | 5.080545 | 4.539531 | 1.234876  |
| C | 5.652796 | 5.855333 | 5.668919  |
| H | 5.966919 | 4.805706 | 5.583522  |
| H | 6.509343 | 6.470285 | 5.373857  |
| C | 4.762795 | 3.267117 | 0.480812  |
| H | 5.210781 | 3.353094 | -0.520161 |

|   |           |           |           |
|---|-----------|-----------|-----------|
| C | 4.642296  | 4.717474  | 2.550072  |
| H | 4.065880  | 3.929781  | 3.025501  |
| C | 8.382414  | 7.839533  | 1.170692  |
| H | 8.402724  | 7.838005  | 2.265655  |
| H | 8.848083  | 6.899681  | 0.842950  |
| C | 5.069931  | 0.754347  | 0.361379  |
| H | 5.552451  | 0.818916  | -0.623353 |
| H | 5.500459  | -0.115945 | 0.867134  |
| C | 3.280500  | 5.230178  | 5.123868  |
| H | 3.556493  | 4.167657  | 5.080293  |
| H | 2.446205  | 5.374552  | 4.428369  |
| C | 6.925512  | 7.849435  | -0.874409 |
| H | 5.896603  | 7.838093  | -1.250894 |
| H | 7.412547  | 6.934104  | -1.237449 |
| C | 9.169670  | 9.033312  | 0.627243  |
| H | 8.730880  | 9.956334  | 1.029386  |
| H | 10.203914 | 8.993988  | 0.983629  |
| C | 9.132268  | 9.073165  | -0.901929 |
| H | 9.663501  | 8.196419  | -1.297054 |
| H | 9.660192  | 9.957293  | -1.273347 |
| C | 2.859639  | 5.560373  | 6.557858  |
| H | 2.531632  | 6.607292  | 6.606009  |
| H | 2.001471  | 4.945838  | 6.848164  |
| C | 5.376332  | 2.027470  | 1.153029  |
| H | 4.964214  | 1.930910  | 2.167030  |
| H | 6.456998  | 2.166223  | 1.264148  |
| C | 7.692305  | 9.056644  | -1.420325 |
| H | 7.680915  | 9.044281  | -2.514942 |
| H | 7.183371  | 9.977997  | -1.107407 |
| C | 3.248806  | 3.073404  | 0.291072  |
| H | 2.771341  | 3.009709  | 1.278697  |
| H | 2.825532  | 3.952062  | -0.207152 |



|   |          |           |           |
|---|----------|-----------|-----------|
| C | 4.021255 | 5.348867  | 7.531607  |
| H | 4.285707 | 4.282695  | 7.545445  |
| H | 3.718352 | 5.613349  | 8.549803  |
| C | 5.246870 | 6.162920  | 7.111730  |
| H | 6.085706 | 5.967573  | 7.787447  |
| H | 5.016054 | 7.233456  | 7.194684  |
| C | 3.562870 | 0.571547  | 0.170074  |
| H | 3.359313 | -0.328229 | -0.419348 |
| H | 3.092056 | 0.422100  | 1.151336  |
| C | 2.943209 | 1.799691  | -0.499793 |
| H | 1.860949 | 1.673243  | -0.605979 |
| H | 3.351317 | 1.900334  | -1.514676 |
| C | 6.389108 | 9.103420  | 3.595769  |
| S | 6.978132 | 10.516761 | 4.031604  |

#### 4. References

- [S1] L. A. McLean, A. J. B. Watson, *Eur. J. Org. Chem.* 2021, **2021**, 4943–4945.
- [S2] D. T. Nguyen, M. J. Evans, C. Jones, *J. Organomet. Chem.* 2024, **1012**, 123143.
- [S3] S. Wiese, M. J. B. Aguila, E. Kogut, T. H. Warren, *Organometallics* 2013, **32**, 2300–2308.
- [S4] T.M. McPhillips, S.E. McPhillips, H.-J. Chiu, A.E. Cohen, A.M. Deacon, P.J. Ellis, E. Garman, A. Gonzalez, N.K. Sauter, R.P. Phizackerley, S.M. Soltis, P. Kuhn, *J. Synchrotron Rad.* 2002, **9**, 401–406.
- [S5] W. Kabsch, *J. Appl. Crystallogr.* 1993, **26**, 795–800.
- [S6] G. M. Sheldrick, *SHELX-18*; University of Göttingen, 2018.
- [S7] M. J. Frisch, G. W. Trucks, H. B. Schlegel, G. E. Scuseria, M. A. Robb, J. R. Cheeseman, G. Scalmani, V. Barone, B. Mennucci, G. A. Petersson, Gaussian 09; Revision D.01, Gaussian Inc., 2009.
- [S8] Y. Zhao, D. G. Truhlar, *Theor. Chem. Acc.*, 2008, **120**, 215–241.
- [S9] A. Lledós, *Eur. J. Inorg. Chem.*, 2021, **2021**, 2547–2555.
- [S10] M. Fischer, M. M. D. Roy, L. L. Wales, M. A. Ellwanger, C. McManus, A. F. Roper, A. Heilmann, S. Aldridge, *Angew. Chem. Int. Ed.*, 2022, **61**, e202211616.
- [S11] W. J. Hehre, R. Ditchfield, J. A. Pople, *J. Chem. Phys.*, 1972, **56**, 2257–2261.
- [S12] P. C. Hariharan, J. A. Pople, *Theor. Chim. Acta*, 1973, **28**, 213–222.
- [S13] T. Clark, J. Chandrasekar, W. Spitznagel, Gunther, P. von R. Schleyer, *J. Comput. Chem.*, 1983, **4**, 294–301.
- [S14] F. Weigend, R. Ahlrichs, *Phys. Chem. Chem. Phys.*, 2005, **7**, 3297–3305.
- [S15] J. Tomasi, B. Mennucci, R. Cammi, *Chem. Rev.*, 2005, **105**, 2999–3093.
- [S16] R. Dennington, T. Keith, J. Milliam, GaussView 5.0, Semichem Inc., Shawnee Mission, KS., 2009.
- [S17] E. D. Glendening, J. K. Badenhoop, A. E. Reed, J. E. Carpenter, J. A. Bohmann, C. M. Morales, C. R. Landis, F. Weinhold, NBO 6.0., 2013.
- [S18] F. Weinhold, C. R. Landis, *Chem. Educ. Res. Pr.*, 2001, **2**, 91–104.

[S19] M. P. Mitoraj, A. Michalak, T. Ziegler, *J. Chem. Theory. Comput.*, 2009, **5**, 962-975.

[S20] F. Neese, *WIREs Comput Mol Sci* 2018, 8:e1327.
